# Supplementary material for: Sulfonylpyrazole- and pyrazole-directed ortho-selective C–H functionalization/alkenylation and desulfenylative olefination of aryl(sulfonyl)pyrazoles
Source: Royal Society of Chemistry journal article supplement (doi:10.1039/d3ob01262j), 2023-01-01
Supplement: d3ob01262j1.pdf [file d3ob01262j1.pdf]

# Supporting Information

## **Sulfonylpyrazole and pyrazole directed *ortho*-selective C–H functionalization/alkenylation and desulfenylative olefination of aryl(sulfonyl)pyrazoles**

Mukhtar Ahmed,<sup>a,b</sup> Shivangani Mahajan,<sup>a,b</sup> Jaspreet Kour,<sup>a,b</sup> and Sanghapal D. Sawant<sup>a,b\*</sup>

<sup>a</sup>Natural Products and Medicinal Chemistry Division, CSIR-Indian Institute of Integrative Medicine, Canal Road, Jammu-180001 (UT of J&K), India.

<sup>b</sup>Academy of Scientific and Innovative Research, Ghaziabad-201002 (Uttar Pradesh), India.

## Content

|                                                                                                                   |                  |
|-------------------------------------------------------------------------------------------------------------------|------------------|
| <b>1. General experimental section</b>                                                                            | <b>S3</b>        |
| <b>2. General experimental procedures</b>                                                                         | <b>S4 – S5</b>   |
| <b>3. Optimization Studies</b>                                                                                    | <b>S6 – S7</b>   |
| <b>4. Physical and Spectroscopic Characterization</b>                                                             | <b>S8 – S22</b>  |
| <b>Data of Compounds</b>                                                                                          |                  |
| <b>5. <math>^1\text{H}</math> and <math>^{13}\text{C}</math> <math>\{^1\text{H}\}</math> NMR and HRMS Spectra</b> | <b>S22 – S68</b> |
| <b>6. References</b>                                                                                              | <b>S69</b>       |

### **General experimental section:**

All reactions were performed in oven-dried glass apparatus. Solvents were distilled in the standard way, and commercial reagents were used without any purification. Analytical TLC was performed on 60 F254 plates, and visualized by exposure to ultraviolet light (UV-254 nm). Column chromatography was carried out with silica (60-120, 100-200 mesh). NMR spectra for characterization of compounds were recorded on Bruker Advance DPX FT-NMR 400 MHz instrument ( $^1\text{H}$ ) at 400 MHz and ( $^{13}\text{C}$ ) at 101 MHz respectively.  $^{19}\text{F}$  NMR were recorded at 377 MHz. Chemical shifts ( $\delta$ ) are reported in ppm, using the residual solvent peak in  $\text{CDCl}_3$  ( $\delta\text{H} = 7.26$  and  $\delta\text{C} = 77.16$  ppm) and  $\text{DMSO-d}_6$  ( $\delta\text{H} = 2.50$  and  $\delta\text{C} = 39.52$  ppm) as internal reference and coupling constants (J) are given in hertz (Hz). The following abbreviations were used to explain the multiplicities: s = singlet, d = doublet, t = triplet, q = quartet, m = multiplet. High-Resolution Mass Spectra (HRMS) were recorded using Waters XEVO-G2-XS-Q-TOF mass spectrometer. Melting points were recorded on BUCHI melting point M-560.

## General Procedure for the synthesis of Sulfonyl hydrazide from Sulfonyl chloride:-

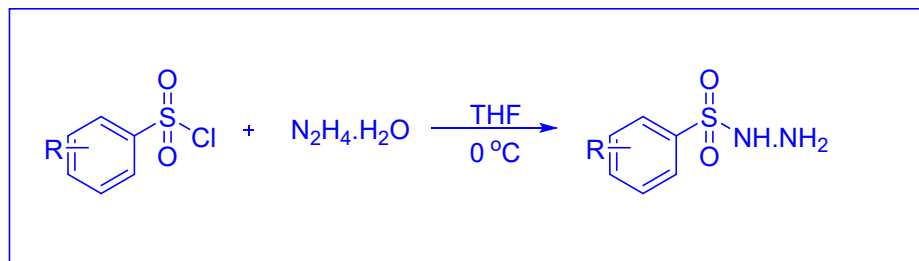

In an round bottom flask, benzenesulfonylchloride (500mg, 2.8mmol, 1.0 equiv) was dissolved in THF and then hydrazine hydrate (0.357 mL 7.14 mmol, 2.5 equiv) was added drop wise at 0 °C. The reaction mixture was stirred at 0 °C for 2 h. The reaction mixture was then cooled to room temperature and extracted with ethyl acetate twice. The organic layer was dried over anhydrous Na<sub>2</sub>SO<sub>4</sub>, filtered and concentrated *in vacuo*. The resulting crude residue was used in the further step without any purification.

## General Procedure for the synthesis Sulfonyl pyrazole from Sulfonyl hydrazide:-

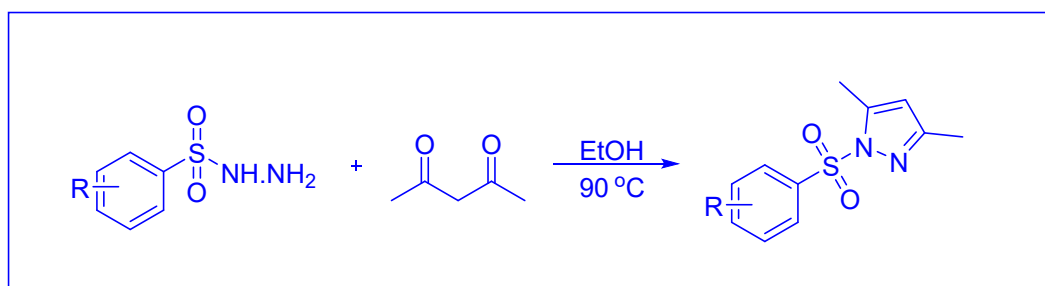

In an round bottom flask, equipped with a magnetic stir bar was added benzenesulfonylhydrazide (500mg, 2.9 mmol, 1.0 equiv), acetylacetone (0.436 mL 4.36 mmol, 1.5 equiv) and ethanol. The reaction mixture was then stirred at 90 °C for 3 h. The reaction mixture was cooled to room temperature and extracted with ethyl acetate twice. The organic layer was dried over anhydrous Na<sub>2</sub>SO<sub>4</sub>, filtered and concentrated *in vacuo*. The resulting crude residue was subjected to silica gel column-chromatography by using EtOAc/hexane to afford the desired product.

## General Procedure for the synthesis of alkenylated sulfonylpyrazole

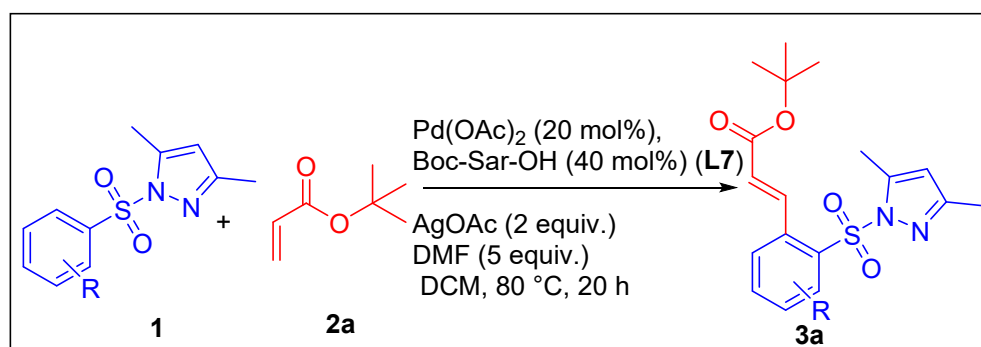

In a round bottom flask, benzenesulfonylpyrazole (100 mg, 0.4 mmol, 1.0 equiv), Pd(OAc)<sub>2</sub> (17.92 mg, 0.08 mmol, 20 mol%), BOC-SAR-OH (29.76 mg, 0.025 mmol, 0.4 equiv), AgOAc (132 mg, 0.8 mmol, 2 equiv.) and DMF (0.144 mL, 2.0 mmol, 5 equiv), *tert*-butyl acrylate (0.234 mL, 0.847 mmol, 2 equiv.) were dissolved in CH<sub>2</sub>Cl<sub>2</sub> (2 mL) under air. The reaction mixture was then stirred at 80 °C for 20 h. The reaction mixture was cooled to room temperature and then diluted with ethyl acetate and filtered through a small pad of Celite. The filtrate was concentrated *in vacuo* and purified by a silica gel packed flash chromatography column, using ethyl acetate/hexane as the eluent.

## General Procedure for the synthesis of Cinnamic acid

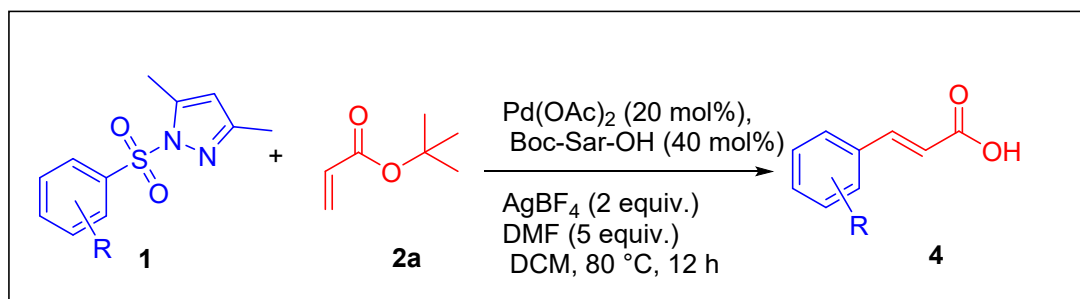

In a round bottom flask, benzenesulfonylpyrazole (100 mg, 0.4 mmol, 1.0 equiv), Pd(OAc)<sub>2</sub> (17.92 mg, 0.08 mmol, 20 mol%), BOC-SAR-OH (29.76 mg, 0.025 mmol, 0.4 equiv), AgBF<sub>4</sub> (155 mg, 0.8 mmol, 2 equiv) and DMF (0.144 mL, 2.0 mmol, 5 equiv), *tert*-butyl acrylate (0.234 mL, 0.847 mmol, 2 equiv.) were dissolved in CH<sub>2</sub>Cl<sub>2</sub> (2 mL) under air. The reaction mixture was then stirred at 80 °C for 12 h. The reaction mixture was cooled to room temperature and then diluted with ethyl acetate and filtered through a small pad of Celite. The filtrate was concentrated *in vacuo* and purified by a silica gel packed flash chromatography column, using ethyl acetate/hexane as the eluent.

### a) Table S1. Screening of Different Bases and Solvents

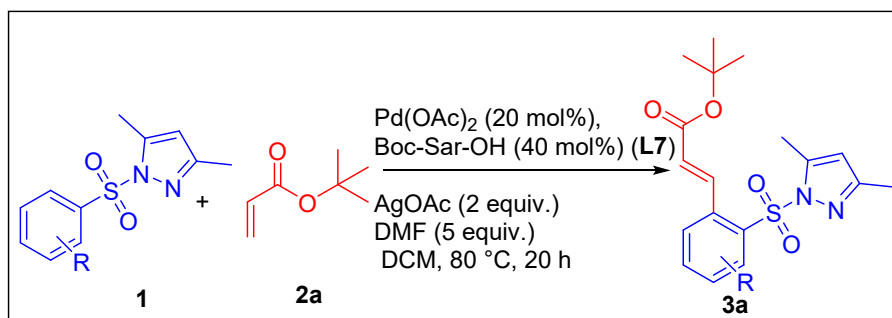

| Entry | Catalyst             | Temp. (°C) | Ligand | Oxidant | Base                            | Solvent | Yield (%) <sup>[b]</sup> |     |
|-------|----------------------|------------|--------|---------|---------------------------------|---------|--------------------------|-----|
|       |                      |            |        |         |                                 |         | 3a                       | 3aa |
| 1.    | Pd(OAc) <sub>2</sub> | 80 °C      | L7     | AgOAc   | Na <sub>2</sub> CO <sub>3</sub> | DCM     | Nr                       |     |
| 2.    | Pd(OAc) <sub>2</sub> | 80 °C      | L7     | AgOAc   | DMF                             | DMSO    | traces                   |     |
| 3.    | Pd(OAc) <sub>2</sub> | 80 °C      | L7     | AgOAc   | DMF                             | THF     | 10                       |     |
| 4.    | Pd(OAc) <sub>2</sub> | 80 °C      | L7     | AgOAc   | DMF                             | Toluene | 20                       |     |
| 5.    | Pd(OAc) <sub>2</sub> | 80 °C      | L7     | AgOAc   | DMF                             | ACN     | 25                       |     |
| 6.    | Pd(OAc) <sub>2</sub> | 80 °C      | L7     | AgOAc   | DMF                             | HFIP    | 45                       |     |
| 7.    | Pd(OAc) <sub>2</sub> | 80 °C      | L7     | AgOAc   | DMF                             | DCE     | 50                       |     |

### b) Table S2. Screening of Different Metal Catalysts

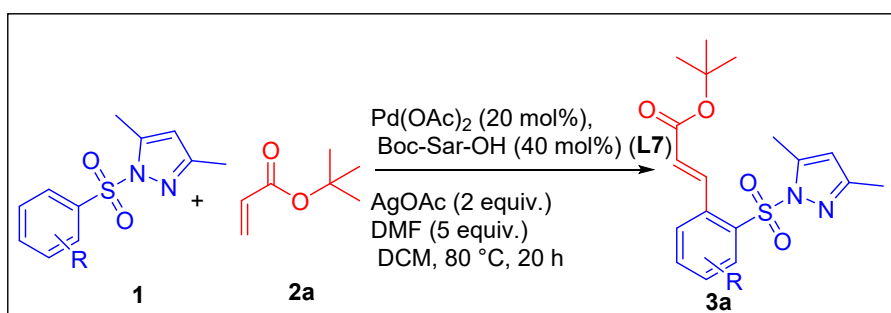

| Entry | Catalyst                                    | Temp. (°C) | Ligand | Oxidant | Base | Solvent | Yield (%) <sup>[b]</sup> |     |
|-------|---------------------------------------------|------------|--------|---------|------|---------|--------------------------|-----|
|       |                                             |            |        |         |      |         | 3a                       | 3aa |
| 1.    | Cu(OAc) <sub>2</sub> ·H <sub>2</sub> O      | 80 °C      | L7     | AgOAc   | DMF  | DCM     | nr                       |     |
| 2.    | RuCl <sub>2</sub>                           | 80 °C      | L7     | AgOAc   | DMF  | DCM     | nr                       |     |
| 3.    | [RuCl <sub>2</sub> (p-cymene)] <sub>2</sub> | 80 °C      | L7     | AgOAc   | DMF  | DCM     | nr                       |     |
| 4.    | [Rh(1,5-COD)Cl] <sub>2</sub>                | 80 °C      | L7     | AgOAc   | DMF  | DCM     | nr                       |     |

### C) Table S3. Optimization of Equivalence of Acrylate

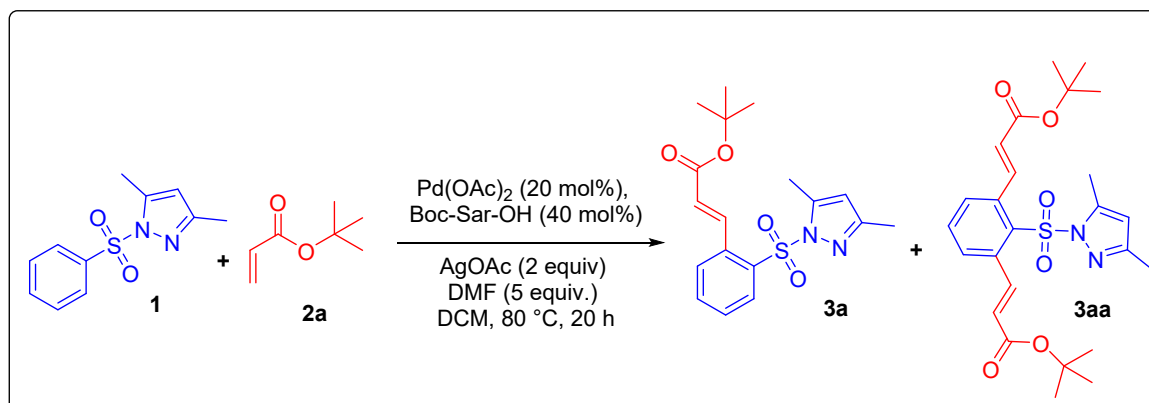

<sup>a</sup>Reaction conditions: **1** (0.423 mmol, 1 equiv.), **2a** (6 equiv., 1.694 mmol),  $\text{Pd}(\text{OAc})_2$  (20 mol %, 0.08 mmol), Boc-Sar-OH (40 mol%, 0.025 mmol), AgOAc (2 equiv., 0.8 mmol), DMF (5 equiv., 2.0 mmol), DCM (4 mL), 80 °C, 20 h. <sup>b</sup> Isolated yields.

| Entry     | Catalyst                                    | Equiv.<br><b>2a</b> | Ligand    | Oxidant      | Base       | Solvent    | Yield (%) <sup>[b]</sup> |            |
|-----------|---------------------------------------------|---------------------|-----------|--------------|------------|------------|--------------------------|------------|
|           |                                             |                     |           |              |            |            | <b>3a</b>                | <b>3aa</b> |
| 1.        | $\text{Pd}(\text{OAc})_2$                   | 1                   | <b>L7</b> | AgOAc        | DMF        | DCM        | 15                       | -          |
| 2.        | $\text{Pd}(\text{OAc})_2$                   | 2                   | <b>L7</b> | AgOAc        | DMF        | DCM        | 35                       | -          |
| 3.        | $\text{Pd}(\text{OAc})_2$                   | 3                   | <b>L7</b> | AgOAc        | DMF        | DCM        | 60                       | traces     |
| 4.        | $\text{Pd}(\text{OAc})_2$                   | 4                   | <b>L7</b> | AgOAc        | DMF        | DCM        | 70                       | 05         |
| 5.        | $\text{Pd}(\text{OAc})_2$                   | 5                   | <b>L7</b> | AgOAc        | DMF        | DCM        | 50                       | 40         |
| <b>6.</b> | <b><math>\text{Pd}(\text{OAc})_2</math></b> | <b>6</b>            | <b>L7</b> | <b>AgOAc</b> | <b>DMF</b> | <b>DCM</b> | <b>30</b>                | <b>60</b>  |

## Spectroscopic Characterization Data of Compounds:-

*tert-butyl (E)-3-(2-((3,5-dimethyl-1H-pyrazol-1-yl)sulfonyl)phenyl)acrylate (3a)*

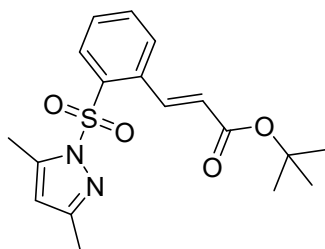

The compound **3a** was purified by column chromatography on silica gel; 108 mg, 70% yield; white solid; m.p. = 113-115 °C.

**<sup>1</sup>H NMR (400 MHz, CDCl<sub>3</sub>):** δ 8.24 (dd, *J* = 15.70, 4.63 Hz, 1H), 8.13 (dd, *J* = 7.81, 3.60 Hz, 1H), 7.62-7.51 (m, 3H), 6.11 (dd, *J* = 15.78, 4.85 Hz, 1H), 5.87 (d, *J* = 3.48 Hz, 1H), 2.56 (d, *J* = 4.25 Hz, 3H), 2.13 (d, *J* = 4.17 Hz, 3H), 1.52 (d, *J* = 4.80 Hz, 9H) ppm

**<sup>13</sup>C{<sup>1</sup>H} NMR (101 MHz, CDCl<sub>3</sub>):** δ 165.0, 153.5, 145.2, 139.0, 136.8, 135.3, 134.4, 130.3, 129.6, 129.1, 125.7, 110.2, 81.1, 28.2, 13.9, 13.4 ppm

**HRMS (ESI) m/z:** calcd. for C<sub>18</sub>H<sub>22</sub>N<sub>2</sub>O<sub>4</sub>NaS [M+Na]<sup>+</sup>: 385.1198, found: 385.1206.

*tert-butyl (E)-3-(5-bromo-2-((3,5-dimethyl-1H-pyrazol-1-yl)sulfonyl)phenyl)acrylate(3b)*

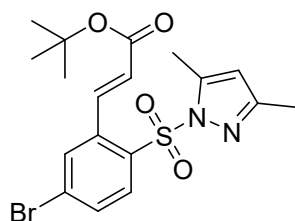

The compound **3b** was purified by column chromatography on silica gel; 89 mg, 63% yield; white semi solid.

**<sup>1</sup>H NMR (400 MHz, CDCl<sub>3</sub>):** δ 7.84-7.82 (m, 2H), 7.68-7.66 (m, 2H), 7.37 (d, *J* = 16.29 Hz, 1H), 6.06 (d, *J* = 16.20 Hz, 1H), 2.59 (s, 3H), 2.34 (s, 3H), 1.50 (s, 9H) ppm

**<sup>13</sup>C{<sup>1</sup>H} NMR (101 MHz, CDCl<sub>3</sub>):** δ 166.3, 152.9, 143.7, 136.8, 132.9, 132.5, 130.0, 129.3, 121.1, 117.9, 80.9, 28.2, 14.7, 11.7 ppm

**HRMS (ESI) m/z:** calcd. for C<sub>18</sub>H<sub>22</sub>N<sub>2</sub>O<sub>4</sub>SBr [M+H]<sup>+</sup>: 441.0484, found: 441.0478.



*tert*-butyl (*E*)-3-(5-chloro-2-((3,5-dimethyl-1*H*-pyrazol-1-yl)sulfonyl)phenyl)acrylate (**3c**)

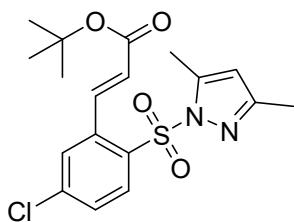

The compound **3c** was purified by column chromatography on silica gel; 94 mg, 64% yield; white solid; m.p. = 115-117 °C.

**<sup>1</sup>H NMR (400 MHz, CDCl<sub>3</sub>):** δ 7.93-7.89(m, 2H), 7.52-7.48 (m, 2H), 7.37 (d, *J* = 16.18 Hz, 1H), 6.05 (d, *J* = 16.21 Hz, 1H), 2.59 (s, 3H), 2.33 (s, 3H), 1.50 (s, 9H) ppm

**<sup>13</sup>C{<sup>1</sup>H} NMR (101 MHz, CDCl<sub>3</sub>):** δ 166.3, 152.8, 143.7, 141.3, 136.2, 132.5, 129.9, 129.3, 121.1, 117.9, 80.9, 28.2, 14.7, 11.7 ppm

**HRMS (ESI) m/z:** calcd. for C<sub>18</sub>H<sub>22</sub>N<sub>2</sub>O<sub>4</sub>SCl [M+H]<sup>+</sup>: 397.0989, found: 397.0984.

*tert*-butyl (*E*)-3-(2-((3,5-dimethyl-1*H*-pyrazol-1-yl)sulfonyl)-5-fluorophenyl)acrylate (**3d**)

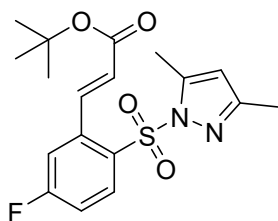

The compound **3d** was purified by column chromatography on silica gel; 90 mg, 60% yield; white solid; m.p. = 136-140 °C.

**<sup>1</sup>H NMR (400 MHz, CDCl<sub>3</sub>):** δ 8.02-7.99(m, 2H), 7.38 (d, *J* = 16.24 Hz, 1H), 7.24-7.19(m, 2H), 6.06 (d, *J* = 16.24 Hz, 1H), 2.60 (s, 3H), 2.35 (s, 3H), 1.51 (s, 9H) ppm

**<sup>13</sup>C{<sup>1</sup>H} NMR (101 MHz, CDCl<sub>3</sub>):** δ 166.3, 152.7, 143.7, 132.6, 130.9 (d, *J* = 9.87 Hz), 121.0, 117.8, 117.1, 116.8, 80.9, 28.3, 14.7, 11.7 ppm

**<sup>19</sup>F NMR (377 MHz, CDCl<sub>3</sub>):** δ -101.4 (s) ppm

**HRMS (ESI) m/z:** calcd. for C<sub>18</sub>H<sub>22</sub>N<sub>2</sub>O<sub>4</sub>FS [M+H]<sup>+</sup>: 381.1284, found: 381.1281.

*tert*-butyl (*E*)-3-(3,6-dichloro-2-((3,5-dimethyl-1*H*-pyrazol-1-yl)sulfonyl)phenyl)acrylate (**3e**)

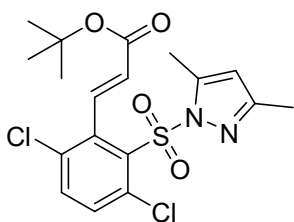

The compound **3e** was purified by column chromatography on silica gel; 88 mg, 62% yield; white semi solid.

**<sup>1</sup>H NMR (400 MHz, CDCl<sub>3</sub>):**  $\delta$  8.28 (d,  $J$  = 2.48 Hz, 1H), 7.55(dd,  $J$  = 8.52, 2.49 Hz, 1H), 7.47-7.41 (m, 2H), 6.10 (d,  $J$  = 16.22 Hz, 1H), 2.71 (s, 3H), 2.31 (s, 3H), 1.53 (s, 9H) ppm

**<sup>13</sup>C{<sup>1</sup>H} NMR (101 MHz, CDCl<sub>3</sub>):**  $\delta$  166.3, 153.0, 145.9, 136.8, 135.4, 133.8, 133.2, 132.5, 132.2, 131.1, 121.1, 116.9, 80.9, 28.3, 14.7, 12.2 ppm

**HRMS (ESI) m/z:** calcd. for C<sub>18</sub>H<sub>21</sub>N<sub>2</sub>O<sub>4</sub>SCl<sub>2</sub> [M+H]<sup>+</sup>: 431.0599, found: 431.0594.

*tert*-butyl (*E*)-3-(2-((3,5-dimethyl-1*H*-pyrazol-1-yl)sulfonyl)-3,5-difluorophenyl)acrylate (**3f**)

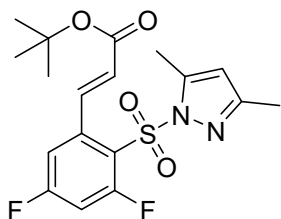

The compound **3f** was purified by column chromatography on silica gel; 85 mg, 58% yield; white solid; m.p. = 128-130 °C.

**<sup>1</sup>H NMR (400 MHz, CDCl<sub>3</sub>):**  $\delta$  8.17-8.12 (m, 1H), 7.43 (d,  $J$  = 16.24 Hz, 1H), 7.10-7.06 (m, 1H), 6.94-6.89 (m, 1H), 6.09 (d,  $J$  = 16.25 Hz, 1H), 2.67 (s, 3H), 2.31 (s, 3H), 1.52 (s, 9H) ppm

**<sup>13</sup>C{<sup>1</sup>H} NMR (101 MHz, CDCl<sub>3</sub>):**  $\delta$  166.3, 153.0, 145.2, 133.3 (d,  $J$  = 11.04 Hz), 132.6, 121.1, 117.4, 112.7, 112.6, 106.4, 106.2, 105.9, 80.9, 28.3, 14.7, 11.7 (d,  $J$  = 3.48 Hz) ppm

**<sup>19</sup>F NMR (377 MHz, CDCl<sub>3</sub>):**  $\delta$  -96.4 to -96.5, -103.8 to -103.9 (m) ppm

**HRMS (ESI) m/z:** calcd. for C<sub>18</sub>H<sub>21</sub>N<sub>2</sub>O<sub>4</sub>F<sub>2</sub>S [M+H]<sup>+</sup>: 399.1190, found: 399.1183.

*tert*-butyl(*E*)-3-(5-bromo-2-((3,5-dimethyl-1*H*-pyrazol-1-yl)sulfonyl)-4-fluorophenyl)acrylate (**3g**)

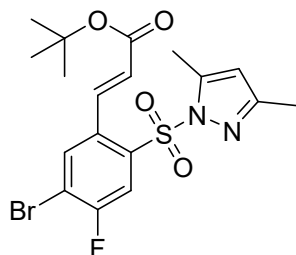

The compound **3g** was purified by column chromatography on silica gel; 85 mg, 61% yield; white solid; m.p. = 142-144 °C.

**<sup>1</sup>H NMR (400 MHz, CDCl<sub>3</sub>):** δ 7.76-7.71 (m, 2H), 7.65 (d, *J* = 8.29 Hz, 1H), 7.38 (dd, *J* = 16.24, 4.28 Hz, 1H), 6.07 (dd, *J* = 11.86, 4.42 Hz, 1H), 2.60 (s, 3H), 2.35 (s, 3H), 1.50 (s, 9H) ppm

**<sup>13</sup>C{<sup>1</sup>H} NMR (101 MHz, CDCl<sub>3</sub>):** δ 166.2, 158.9 (d, *J* = 253.72 Hz), 153.3, 143.8, 138.5 (d, *J* = 6.24 Hz), 135.0, 132.3, 124.5 (d, *J* = 4.01 Hz), 121.4, 118.1, 117.2 (d, *J* = 20.77 Hz), 116.2 (d, *J* = 25.95 Hz), 81.0, 28.2, 14.7, 11.7 ppm

**<sup>19</sup>F NMR (377 MHz, CDCl<sub>3</sub>):** δ -101.6 (s) ppm

**HRMS (ESI) m/z:** calcd. for C<sub>18</sub>H<sub>21</sub>N<sub>2</sub>O<sub>4</sub>FSBr [M+H]<sup>+</sup>: 459.0389, found: 459.0386.

*tert*-butyl(*E*)-3-(5-chloro-2-((3,5-dimethyl-1*H*-pyrazol-1-yl)sulfonyl)-4-(trifluoromethyl)phenyl)acrylate (**3h**)

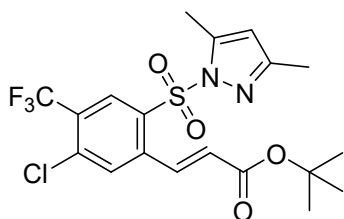

The compound **3h** was purified by column chromatography on silica gel; 73 mg, 53% yield; white solid; m.p. = 144-146 °C.

**<sup>1</sup>H NMR (400 MHz, CDCl<sub>3</sub>):** δ 8.28 (d, *J* = 2.04 Hz, 1H), 8.09 (dd, *J* = 8.49, 2.23 Hz, 1H), 7.70 (d, *J* = 8.49 Hz, 1H), 7.37 (d, *J* = 16.24 Hz, 1H), 6.07 (d, *J* = 16.22 Hz, 1H), 2.62 (s, 3H), 2.34 (s, 3H), 1.50 (s, 9H) ppm

**<sup>13</sup>C{<sup>1</sup>H} NMR (101 MHz, CDCl<sub>3</sub>):** δ 166.2, 153.5, 143.9, 139.4, 136.9, 132.9, 132.2, 130.0 (q, *J* = 33.20 Hz), 127.4 (q, *J* = 5.38 Hz), 123.1, 121.6, 120.4, 118.2, 81.0, 28.2, 14.7, 11.7 ppm

**<sup>19</sup>F NMR (377 MHz, CDCl<sub>3</sub>):** δ -63.1 (s) ppm

**HRMS (ESI) m/z:** calcd. for C<sub>19</sub>H<sub>21</sub>N<sub>2</sub>O<sub>4</sub>F<sub>3</sub>SCl [M+H]<sup>+</sup>: 465.0863, found: 465.0858.

*tert*-butyl (*E*)-3-(2-((3,5-dimethyl-1*H*-pyrazol-1-yl)sulfonyl)-3-methylphenyl)acrylate (**3i**)

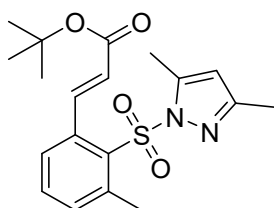

The compound **3i** was purified by column chromatography on silica gel; 107 mg, 71% yield; white solid; m.p. = 136-140°C.

**<sup>1</sup>H NMR (400 MHz, CDCl<sub>3</sub>):** δ 7.84 (d, *J* = 8.30 Hz, 2H), 7.37 (d, *J* = 16.13 Hz, 1H), 7.31 (d, *J* = 8.02 Hz, 2H), 6.04 (d, *J* = 16.24 Hz, 1H), 2.58 (s, 3H), 2.41 (s, 3H), 2.34 (s, 3H), 1.49 (s, 9H) ppm

**<sup>13</sup>C{<sup>1</sup>H} NMR (101 MHz, CDCl<sub>3</sub>):** δ 166.4, 152.3, 145.8, 143.6, 134.9, 130.1, 127.9, 120.6, 117.5, 80.8, 28.2, 21.8, 14.7, 11.6 ppm

**HRMS (ESI) m/z:** calcd. for C<sub>19</sub>H<sub>25</sub>N<sub>2</sub>O<sub>4</sub>S [M+H]<sup>+</sup>: 377.1535, found: 377.1529.

*tert*-butyl (*E*)-3-(2-((3,5-dimethyl-1*H*-pyrazol-1-yl)sulfonyl)-5-methylphenyl)acrylate (**3j**)

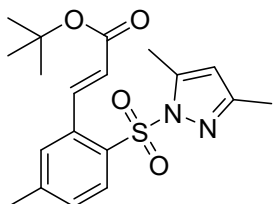

The compound **3j** was purified by column chromatography on silica gel; 106 mg, 70% yield; white solid; m.p. = 136-140 °C.

**<sup>1</sup>H NMR (400 MHz, CDCl<sub>3</sub>):** δ 7.85 (d, *J* = 8.34 Hz, 2H), 7.38 (d, *J* = 16.22 Hz, 1H), 7.32(d, *J* = 16.08 Hz, 2H), 6.04 (d, *J* = 16.28 Hz, 1H), 2.59 (s, 3H), 2.42 (s, 3H), 2.34 (s, 3H), 1.50 (s, 9H) ppm

**<sup>13</sup>C{<sup>1</sup>H} NMR (101 MHz, CDCl<sub>3</sub>):** δ 166.4, 152.3, 145.8, 143.6, 135.0, 132.8, 130.1, 127.9, 120.6, 117.6, 80.8, 28.3, 21.8, 14.7, 11.6 ppm

**HRMS (ESI) m/z:** calcd. for C<sub>19</sub>H<sub>25</sub>N<sub>2</sub>O<sub>4</sub>S [M+H]<sup>+</sup>: 377.1535, found: 377.1536.

*tert*-butyl (*E*)-3-(2-((3,5-dimethyl-1*H*-pyrazol-1-yl)sulfonyl)-5-propylphenyl)acrylate (**3k**)

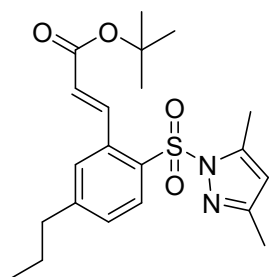

The compound **3k** was purified by column chromatography on silica gel; 98 mg, 67% yield; white solid; m.p. = 85-90 °C.

**<sup>1</sup>H NMR (400 MHz, CDCl<sub>3</sub>):** δ 7.86 (d, *J* = 8.26 Hz, 2H), 7.38 (d, *J* = 16.15 Hz, 1H), 7.32 (d, *J* = 8.17 Hz, 2H), 6.05 (d, *J* = 16.33 Hz, 1H), 2.64 (t, *J* = 7.66 Hz, 2H), 2.59 (s, 3H), 2.35 (s, 3H), 1.67-1.61 (m, 2H), 1.50 (s, 9H), 0.93 (t, *J* = 7.32 Hz, 3H) ppm

**<sup>13</sup>C{<sup>1</sup>H} NMR (101 MHz, CDCl<sub>3</sub>):** δ 166.4, 152.3, 150.4, 143.6, 135.1, 132.8, 129.6, 127.9, 120.6, 117.6, 80.8, 38.1, 28.3, 24.1, 14.7, 13.8, 11.6 ppm

**HRMS (ESI) m/z:** calcd. for C<sub>21</sub>H<sub>29</sub>N<sub>2</sub>O<sub>4</sub>S [M+H]<sup>+</sup>: 405.1848, found: 405.1845.

*tert*-butyl (*E*)-3-(5-(*tert*-butyl)-2-((3,5-dimethyl-1*H*-pyrazol-1-yl)sulfonyl)phenyl)acrylate (**3l**)

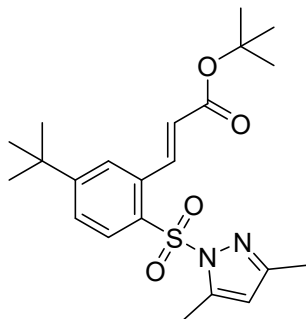

The compound **3l** was purified by column chromatography on silica gel; 98 mg, 68% yield; white semi solid.

**<sup>1</sup>H NMR (400 MHz, CDCl<sub>3</sub>):** δ 7.88 (d, *J* = 8.67 Hz, 2H), 7.53 (d, *J* = 8.67 Hz, 2H), 7.39 (d, *J* = 16.21 Hz, 1H), 6.05 (d, *J* = 16.46 Hz, 1H), 2.59 (s, 3H), 2.36 (s, 3H), 1.50 (s, 9H), 1.32 (s, 9H) ppm

**<sup>13</sup>C{<sup>1</sup>H} NMR (101 MHz, CDCl<sub>3</sub>):** δ 166.4, 158.6, 134.8, 132.8, 129.2, 127.7, 126.6, 120.6, 80.8, 35.5, 31.0, 28.3, 14.8, 11.7 ppm

**HRMS (ESI) m/z:** calcd. for C<sub>22</sub>H<sub>31</sub>N<sub>2</sub>O<sub>4</sub>S [M+H]<sup>+</sup>: 419.2005, found: 419.2000.

*tert*-butyl (*E*)-3-(2-((3,5-dimethyl-1*H*-pyrazol-1-yl)sulfonyl)-5-methoxyphenyl)acrylate (**3m**)

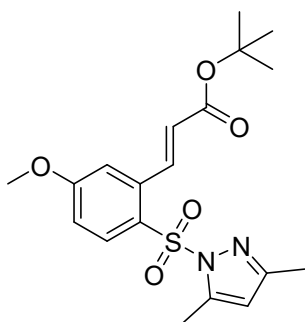

The compound **3m** was purified by column chromatography on silica gel; 98 mg, 68% yield; white semi solid.

**<sup>1</sup>H NMR (400 MHz, DMSO-*d*<sub>6</sub>):**  $\delta$  8.17 (d, *J* = 15.81 Hz, 1H), 8.01 (d, *J* = 8.96 Hz, 1H), 7.38 (d, *J* = 2.60 Hz, 1H), 7.19 (dd, *J* = 8.97, 2.61 Hz, 1H), 6.49 (d, *J* = 15.67 Hz, 1H), 6.13 (s, 1H), 3.91 (s, 3H), 2.47 (s, 3H), 2.05 (s, 3H), 1.48 (s, 9H) ppm

**<sup>13</sup>C{<sup>1</sup>H} NMR (101 MHz, DMSO-*d*<sub>6</sub>):**  $\delta$  165.1, 164.3, 153.0, 144.5, 138.8, 136.6, 132.9, 130.6, 127.7, 125.7, 116.2, 114.6, 110.8, 81.0, 56.6, 28.2, 13.8, 13.2 ppm

**HRMS (ESI) m/z:** calcd. for C<sub>19</sub>H<sub>25</sub>N<sub>2</sub>O<sub>5</sub>S [M+H]<sup>+</sup>: 393.1484, found: 393.1490.

*tert*-butyl (*E*)-3-(5-isopropoxy-2-((5-methyl-1*H*-pyrazol-1-yl)sulfonyl)phenyl)acrylate (**3n**)

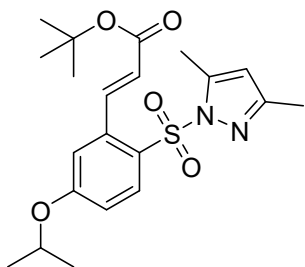

The compound **3n** was purified by column chromatography on silica gel; 98 mg, 69% yield; white semi solid.

**<sup>1</sup>H NMR (400 MHz, CDCl<sub>3</sub>):**  $\delta$  7.89-7.87 (m, 2H), 7.39 (d, *J* = 16.22 Hz, 1H), 6.94-6.92 (m, 2H), 6.04 (d, *J* = 16.21 Hz, 1H), 4.66-4.59 (m, 1H), 2.59 (s, 3H), 2.35 (s, 3H), 1.50 (s, 9H), 1.35 (d, *J* = 6.05 Hz, 6H) ppm

**<sup>13</sup>C{<sup>1</sup>H} NMR (101 MHz, CDCl<sub>3</sub>):**  $\delta$  166.5, 163.0, 152.0, 143.4, 132.9, 130.3, 128.5, 120.4, 117.4, 115.8, 80.8, 70.8, 28.3, 21.9, 14.7, 11.6 ppm

**HRMS (ESI) m/z:** calcd. for C<sub>21</sub>H<sub>29</sub>N<sub>2</sub>O<sub>5</sub>S [M+H]<sup>+</sup>: 421.1797, found: 421.1789.

*tert-butyl(E)-3-(2-((3,5-dimethyl-1H-pyrazol-1-yl)sulfonyl)-3(trifluoromethyl)phenyl)acrylate*  
**(3o)**

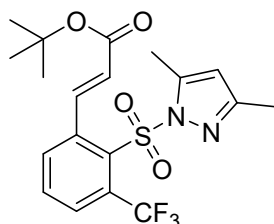

The compound **3o** was purified by column chromatography on silica gel; 79 mg, 56% yield; white solid; m.p. = 148-150 °C.

**<sup>1</sup>H NMR (400 MHz, CDCl<sub>3</sub>):** δ 8.24-8.21 (m, 1H), 7.91-7.88 (m, 1H), 7.80-7.78 (m, 2H), 7.44 (d, *J* = 16.21 Hz, 1H), 6.09 (d, *J* = 16.27 Hz, 1H), 2.66 (s, 3H), 2.30 (s, 3H), 1.52 (s, 9H) ppm

**<sup>13</sup>C{<sup>1</sup>H} NMR (101 MHz, CDCl<sub>3</sub>):** δ 166.3, 152.4, 145.1, 136.6, 134.4, 133.2, 132.6 (2C), 128.6 (q, *J* = 6.17 Hz), 128.3, 123.7, 121.0, 117.0, 80.8, 28.3, 14.6, 11.6 ppm

**<sup>19</sup>F NMR (377 MHz, CDCl<sub>3</sub>):** δ -58.0 (s) ppm

**HRMS (ESI) m/z:** calcd. for C<sub>19</sub>H<sub>22</sub>N<sub>2</sub>O<sub>4</sub>F<sub>3</sub>S [M+H]<sup>+</sup>: 431.1252, found: 431.1242.

*tert-butyl(E)-3-(2-((5-methyl-1H-pyrazol-1-yl)sulfonyl)-4-(trifluoromethyl)phenyl)acrylate*  
**(3p)**

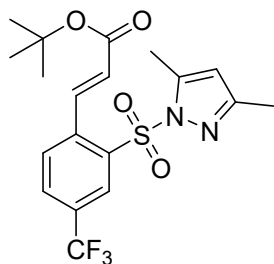

The compound **3p** was purified by column chromatography on silica gel; 79 mg, 56% yield; white solid; m.p. = 90-92 °C.

**<sup>1</sup>H NMR (400 MHz, CDCl<sub>3</sub>):** δ 8.26 (s, 1H), 8.18 (d, *J* = 7.91 Hz, 1H), 7.91 (d, *J* = 7.82 Hz, 1H), 7.71 (t, *J* = 7.93 Hz, 1H), 7.38 (d, *J* = 16.26 Hz, 1H), 6.07 (d, *J* = 16.23 Hz, 1H), 2.63 (s, 3H), 2.35 (s, 3H), 1.51 (s, 9H) ppm

**<sup>13</sup>C{<sup>1</sup>H} NMR (101 MHz, CDCl<sub>3</sub>):** δ 166.2, 153.3, 143.9, 139.1, 132.4, 132.3, 132.1, 131.2, 131.1 (d, *J* = 3.48 Hz), 130.4, 125.0 (d, *J* = 3.65 Hz), 121.4, 118.1, 80.9, 28.3, 14.7, 11.7 ppm

**<sup>19</sup>F NMR (377 MHz, CDCl<sub>3</sub>):** δ -62.8 (s) ppm

**HRMS (ESI) m/z:** calcd. for C<sub>19</sub>H<sub>22</sub>N<sub>2</sub>O<sub>4</sub>SF<sub>3</sub> [M+H]<sup>+</sup>: 431.1252, found: 431.1245.

*tert-butyl(E)-3-(2-((3,5-dimethyl-1H-pyrazol-1-yl)sulfonyl)-3-(trifluoromethoxy)phenyl)acrylate (3q)*

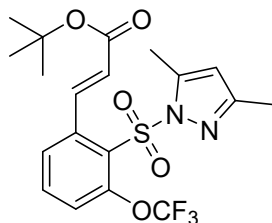

The compound **3q** was purified by column chromatography on silica gel; 77 mg, 55% yield; white semi solid.

**<sup>1</sup>H NMR (400 MHz, CDCl<sub>3</sub>):** δ 8.28-8.25 (m, 1H), 7.74-7.69 (m, 1H), 7.52-7.43 (m, 2H), 7.38 (d, *J* = 8.33 Hz, 1H), 6.12-6.07 (m, 1H), 2.68 (s, 3H), 2.29 (s, 3H), 1.53 (s, 9H) ppm

**<sup>13</sup>C{<sup>1</sup>H} NMR (101 MHz, CDCl<sub>3</sub>):** δ 166.4, 152.7, 146.5, 145.3, 136.4, 132.4 (d, *J* = 49.08 Hz), 129.7, 126.7, 121.4, 120.9, 119.9 (d, *J* = 2.04 Hz), 118.8, 117.0, 80.9, 28.3, 14.6, 11.6 ppm

**<sup>19</sup>F NMR (377 MHz, CDCl<sub>3</sub>):** δ -56.4 (s) ppm

**HRMS (ESI) m/z:** calcd. for C<sub>19</sub>H<sub>22</sub>N<sub>2</sub>O<sub>5</sub>F<sub>3</sub>S [M+H]<sup>+</sup>: 447.1202, found: 447.1195.

*tert-butyl (E)-3-(5-cyano-2-((3,5-dimethyl-1H-pyrazol-1-yl)sulfonyl)phenyl)acrylate (3r)*

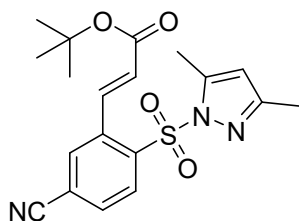

The compound **3r** was purified by column chromatography on silica gel; 77 mg, 52% yield; white solid; m.p. = 175-178 °C.

**<sup>1</sup>H NMR (400 MHz, CDCl<sub>3</sub>):** δ 8.09 (d, *J* = 8.66 Hz, 2H), 7.83 (d, *J* = 8.68 Hz, 2H), 7.36 (d, *J* = 16.24 Hz, 1H), 6.06 (d, *J* = 16.26 Hz, 1H), 2.60 (s, 3H), 2.33 (s, 3H), 1.50 (s, 9H) ppm

**<sup>13</sup>C{<sup>1</sup>H} NMR (101 MHz, CDCl<sub>3</sub>):** δ 166.1, 153.5, 143.9, 141.7, 133.2, 132.1, 128.5, 121.6, 130.4, 118.2 (d, *J* = 12.07 Hz), 116.9, 81.0, 28.2, 14.7, 11.7 ppm

**HRMS (ESI) m/z:** calcd. for C<sub>19</sub>H<sub>22</sub>N<sub>3</sub>O<sub>4</sub>S [M+H]<sup>+</sup>: 388.1331, found: 388.1334.



*methyl (E)-3-(2-((3,5-dimethyl-1H-pyrazol-1-yl)sulfonyl)phenyl)acrylate(3s)*

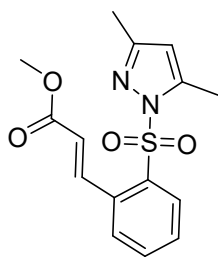

The compound **3s** was purified by column chromatography on silica gel; 128 mg, 74% yield; yellow semi solid.

**<sup>1</sup>H NMR (400 MHz, CDCl<sub>3</sub>)** :  $\delta$  8.00-7.97 (m, 2H), 7.67-7.63 (m, 1H), 7.57-7.53 (m, 2H), 7.48 (d,  $J$  = 16.26, 1H), 6.13 (d,  $J$  = 16.37 Hz, 1H), 3.78 (s, 3H), 2.62 (s, 3H), 2.35 (s, 3H) ppm

**<sup>13</sup>C{<sup>1</sup>H} NMR (101 MHz, CDCl<sub>3</sub>)**:  $\delta$  167.4, 152.4, 144.1, 137.9, 134.6, 134.0, 129.6, 127.9, 118.4, 117.5, 51.9, 14.8, 11.7 ppm

**HRMS (ESI) m/z**: calcd. for C<sub>15</sub>H<sub>17</sub>N<sub>2</sub>O<sub>4</sub>S [M+H]<sup>+</sup>:321.0909, found:321.0913.

*ethyl (E)-3-(2-((3,5-dimethyl-1H-pyrazol-1-yl)sulfonyl)phenyl)acrylate(3t)*

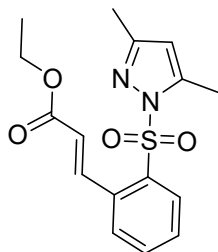

The compound **3t** was purified by column chromatography on silica gel; 96 mg, 68% yield; white solid; m.p. = 138-140 °C.

**<sup>1</sup>H NMR (400 MHz, CDCl<sub>3</sub>)**:  $\delta$  8.00-7.97 (m, 2H), 7.68-7.63 (m, 1H), 7.57-7.53 (m, 2H), 7.48 (d,  $J$ =16.25 Hz, 1H), 6.13 (d,  $J$ =16.24 Hz, 1H), 4.24 (d,  $J$ =7.13 Hz, 2H), 2.62 (s, 3H), 2.36 (s, 3H), 1.32 (t,  $J$ =7.11 Hz, 3H) ppm

**<sup>13</sup>C{<sup>1</sup>H} NMR (101 MHz, CDCl<sub>3</sub>)**:  $\delta$  167.0, 152.4, 144.0, 137.9, 134.5, 133.8, 129.5, 127.9, 118.9, 117.6, 60.7, 14.7, 14.4, 11.7 ppm

**HRMS (ESI) m/z**: calcd.for C<sub>16</sub>H<sub>19</sub>N<sub>2</sub>O<sub>4</sub>S [M+H]<sup>+</sup>: 335.1066, found: 335.1072.

*butyl (E)-3-(2-((3,5-dimethyl-1H-pyrazol-1-yl)sulfonyl)phenyl)acrylate(3u)*

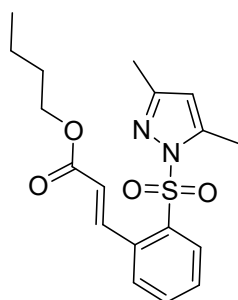

The compound **3u** was purified by column chromatography on silica gel; 153 mg, 62% yield; white semi solid.

**<sup>1</sup>H NMR (400 MHz, CDCl<sub>3</sub>):**  $\delta$  7.98-7.96 (m, 2H), 7.64-7.62 (m, 1H), 7.56-7.52 (m, 2H), 7.47 (d,  $J = 16.19$  Hz, 1H), 6.12 (d,  $J = 16.25$  Hz, 1H), 4.17 (t,  $J = 6.69$  Hz, 2H), 2.61 (s, 3H), 2.35 (s, 3H), 1.69-1.62 (m, 2H), 1.45-1.36 (m, 2H), 0.94 (t,  $J = 7.36$  Hz, 3H) ppm

**<sup>13</sup>C{<sup>1</sup>H} NMR (101 MHz, CDCl<sub>3</sub>):**  $\delta$  167.1, 152.4, 143.9, 137.9, 134.5, 133.7, 129.5, 127.9, 118.9, 117.6, 64.6, 30.8, 19.2, 14.7, 13.8, 11.7 ppm

**HRMS (ESI) m/z:** calcd. for C<sub>18</sub>H<sub>23</sub>N<sub>2</sub>O<sub>4</sub>S [M+H]<sup>+</sup>: 363.1379, found: 363.1381.

*di-tert-butyl 3,3'-(2-((3,5-dimethyl-1H-pyrazol-1-yl)sulfonyl)-1,3-phenylene)(2E,2'E)-diacrylate (3aa)*

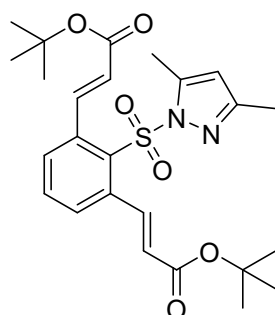

The compound **3aa** was purified by column chromatography on silica gel; 110 mg, 53% yield; white semi solid.

**<sup>1</sup>H NMR (400 MHz, CDCl<sub>3</sub>):**  $\delta$  8.30 (d,  $J = 15.75$ , 2H), 7.60-7.56 (m, 1H), 7.49 (d,  $J = 7.81$ , 2H), 6.03 (d,  $J = 15.75$ , 2H), 5.84 (s, 1H), 2.60 (s, 3H), 2.11 (s, 3H), 1.52 (s, 18H) ppm

**<sup>13</sup>C{<sup>1</sup>H} NMR (101 MHz, CDCl<sub>3</sub>):**  $\delta$  165.2, 153.5, 145.2, 141.8, 138.4, 135.1, 133.9, 131.0, 130.8, 125.0, 109.8, 81.0, 28.2, 13.9, 13.4 ppm

**HRMS (ESI) m/z:** calcd. for C<sub>25</sub>H<sub>33</sub>N<sub>2</sub>O<sub>6</sub>S [M+H]<sup>+</sup>: 489.2059, found: 489.2057.

*tert*-butyl (*E*)-3-(2-(3,5-dimethyl-1*H*-pyrazol-1-yl)phenyl)acrylate (**4a**)

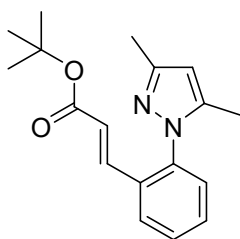

The compound **4a** was purified by column chromatography on silica gel; 128 mg, 74% yield; white semi solid.

**<sup>1</sup>H NMR (400 MHz, CDCl<sub>3</sub>):**  $\delta$  7.59 (d,  $J$  = 16.14 Hz, 1H), 7.50-7.46 (m, 2H), 7.41-7.38 (m, 3H), 6.06 (d,  $J$  = 16.16 Hz, 1H), 2.43 (s, 3H), 2.38 (s, 3H), 1.54 (s, 9H) ppm

**<sup>13</sup>C{<sup>1</sup>H} NMR (101 MHz, CDCl<sub>3</sub>):**  $\delta$  167.4, 149.2, 140.2, 139.1, 134.9, 129.3, 128.2, 125.3, 116.8, 114.8, 80.3, 28.4, 14.0, 11.7 ppm

**HRMS (ESI) m/z:** calcd. for C<sub>18</sub>H<sub>23</sub>N<sub>2</sub>O<sub>2</sub> [M+H]<sup>+</sup>: 299.1760, found: 299.1760.

*tert*-butyl (*E*)-3-(5-bromo-2-(3,5-dimethyl-1*H*-pyrazol-1-yl)phenyl)acrylate (**4b**)

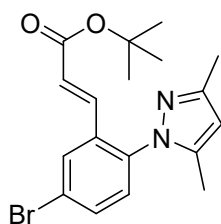

The compound **4b** was purified by column chromatography on silica gel; 101 mg, 67% yield; white semi solid.

**<sup>1</sup>H NMR (400 MHz, CDCl<sub>3</sub>):**  $\delta$  7.61-7.55 (m, 3H), 7.29 (d,  $J$  = 8.64 Hz, 2H), 6.06 (d,  $J$  = 16.18 Hz, 1H), 2.42 (s, 3H), 2.38 (s, 3H), 1.54 (s, 9H) ppm

**<sup>13</sup>C{<sup>1</sup>H} NMR (101 MHz, CDCl<sub>3</sub>):**  $\delta$  167.3, 149.5, 140.1, 138.2, 134.5, 132.4, 126.6, 121.8, 117.3, 115.2, 80.4, 28.4, 14.0, 11.7 ppm

**HRMS (ESI) m/z:** calcd. for C<sub>18</sub>H<sub>22</sub>N<sub>2</sub>O<sub>2</sub>Br [M+H]<sup>+</sup>: 377.0865, found: 377.0866.

*tert*-butyl (*E*)-3-(2-(3,5-dimethyl-1*H*-pyrazol-1-yl)-3-fluorophenyl)acrylate (**4c**)

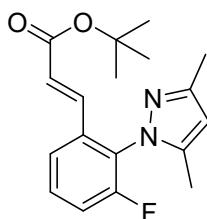

The compound **4c** was purified by column chromatography on silica gel; 106 mg, 64% yield; white semi solid.

**<sup>1</sup>H NMR (400 MHz, CDCl<sub>3</sub>):** δ 7.61-7.56 (m, 1H), 7.45-7.43 (m, 2H), 7.30-7.27 (m, 1H), 7.24-7.21 (m, 1H), 6.06 (dd, *J* = 16.20, 3.33 Hz, 1H), 2.43 (d, *J* = 3.34 Hz, 3H), 2.27 (d, *J* = 1.28 Hz, 3H), 1.54 (d, *J* = 3.35 Hz, 9H) ppm

**<sup>13</sup>C{<sup>1</sup>H} NMR (101 MHz, CDCl<sub>3</sub>):** δ 167.3, 158.0, 155.5, 149.9, 142.1, 134.7, 130.6 (d, *J* = 7.74 Hz), 129.1, 127.0 (d, *J* = 11.91 Hz), 125.0 (d, *J* = 3.95 Hz), 117.1, 116.7 (d, *J* = 19.99 Hz), 114.3, 80.3, 28.4, 14.0, 10.9 (d, *J* = 3.91 Hz) ppm

**<sup>19</sup>F NMR (377 MHz, CDCl<sub>3</sub>):** δ -121.4 (s) ppm

**HRMS (ESI)m/z:** calcd. for C<sub>18</sub>H<sub>22</sub>N<sub>2</sub>O<sub>2</sub>F [M+H]<sup>+</sup>: 317.1665, found: 317.1664.

#### *Cinnamic acid (5a)*<sup>1</sup>

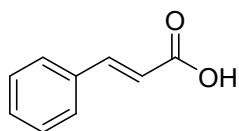

The compound **5a** was purified by column chromatography on silica gel, 110 mg, 53% yield; white semi solid.

**<sup>1</sup>H NMR (400 MHz, DMSO-*d*<sub>6</sub>):** δ 7.68-7.66 (m, 2H), 5.78 (d, *J* = 16.03 Hz, 1H), 7.42-7.40 (m, 3H), 6.52 (d, *J* = 16.17 Hz, 1H) ppm

**<sup>13</sup>C{<sup>1</sup>H} NMR (101 MHz, DMSO-*d*<sub>6</sub>):** δ 168.2, 144.4, 134.7, 130.8, 129.5, 128.7, 119.8 ppm

#### *(E)-3-(4-chlorophenyl)acrylic acid (5b)*

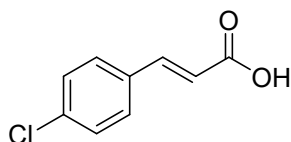

The compound **5b** was purified by column chromatography on silica gel; 110 mg, 53% yield; white semi solid.

**<sup>1</sup>H NMR (400 MHz, DMSO-d<sub>6</sub>):** δ 6.83 (d, *J* = 15.99 Hz, 1H), 6.80-6.76 (m, 2H), 6.62-6.58 (m, 2H), 5.68 (d, *J* = 16.00 Hz, 1H) ppm

**<sup>13</sup>C{<sup>1</sup>H} NMR (101 MHz, DMSO-d<sub>6</sub>):** δ 161.1, 135.7, 128.1, 125.5, 121.6, 121.1, 111.2 ppm

*(E)*-3-(*p*-tolyl)acrylic acid (**5c**)

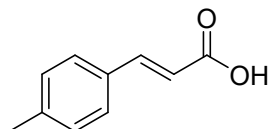

The compound **5c** was purified by column chromatography on silicagel; 45mg, 67% yield; white semi solid.

**<sup>1</sup>H NMR (400 MHz, DMSO-d<sub>6</sub>):** δ 7.58-7.53 (m, 3H), 7.23 (d, *J* = 7.96 Hz, 2H), 6.46 (d, *J* = 16.01 Hz, 1H), 2.32 (s, 3H) ppm

**<sup>13</sup>C{<sup>1</sup>H} NMR (101 MHz, DMSO-d<sub>6</sub>):** δ 168.1, 144.4, 140.6, 131.9, 129.9, 128.6, 118.5, 21.4 ppm

*(E)*-3-mesitylacrylic acid (**5d**)

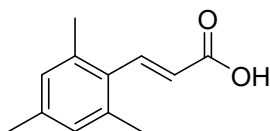

The compound **5d** was purified by column chromatography on silica gel; 46 mg, 70% yield; white semi solid.

**<sup>1</sup>H NMR (400 MHz, DMSO-d<sub>6</sub>):** δ 7.67 (d, *J* = 16.36 Hz, 1H), 6.90 (s, 2H), 6.00 (d, *J* = 16.35 Hz, 1H), 2.25 (s, 6H), 2.22 (s, 3H) ppm

**<sup>13</sup>C{<sup>1</sup>H} NMR (101 MHz, DMSO-d<sub>6</sub>):** δ 168.0, 142.6, 138.3, 136.9, 131.0, 129.5, 124.4, 21.2 (2) ppm

*(E)*-3-(2,4,6-triisopropylphenyl)acrylic acid (**5e**)

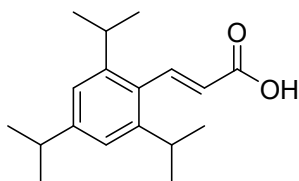

The compound **5e** was purified by column chromatography on silica gel; 55 mg, 72% yield; white semi solid.

$^1\text{H}$  NMR (400 MHz, DMSO- $d_6$ ):  $\delta$  7.77 (d,  $J$  = 16.26 Hz, 1H), 7.03 (s, 2H), 5.85 (d,  $J$  = 16.26 Hz, 1H), 3.05-2.98 (m, 2H), 2.89-2.82 (m, 1H), 1.19 (d,  $J$  = 6.96 Hz, 6H), 1.14 (d,  $J$  = 6.84 Hz, 12H) ppm

$^{13}\text{C}\{^1\text{H}\}$  NMR (101 MHz, DMSO- $d_6$ ):  $\delta$  167.3, 148.8, 146.1, 143.9, 130.5, 125.7, 120.9, 34.0, 30.1, 24.3, 24.1 ppm

$^1\text{H}$ -NMR (400 MHz,  $\text{CDCl}_3$ ) of **3a**

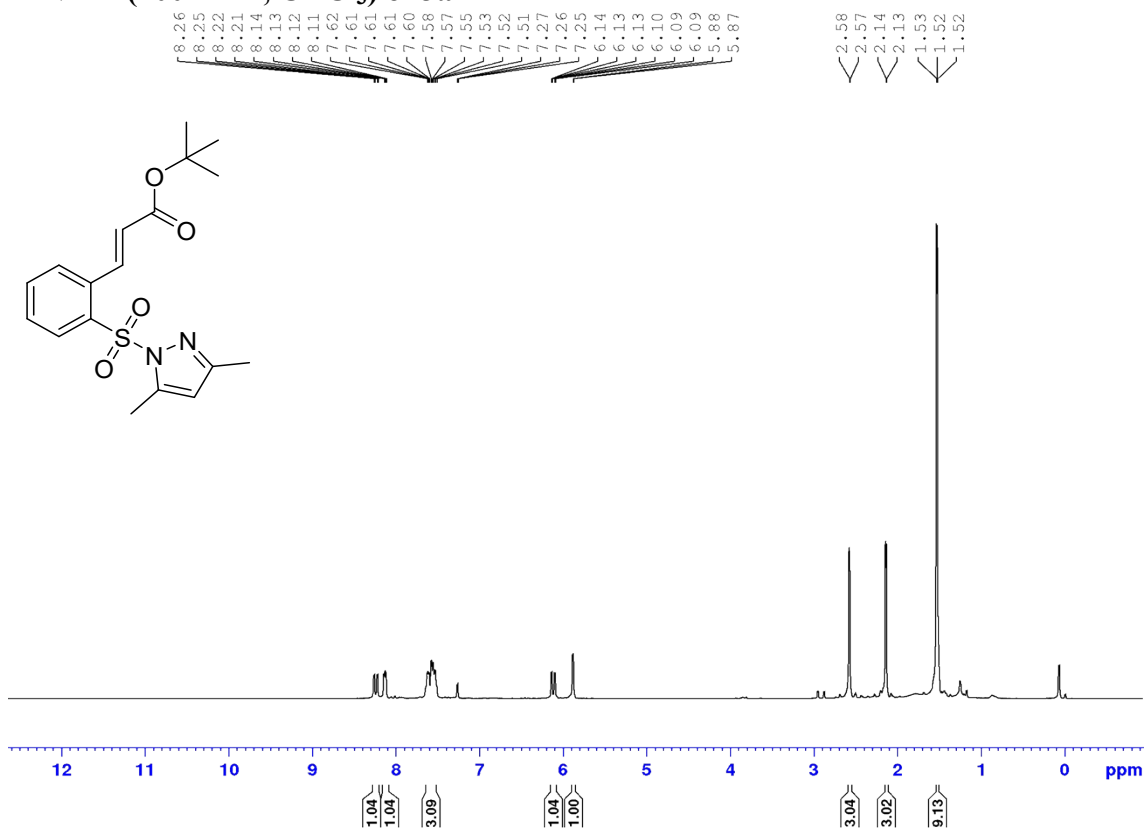

# $^{13}\text{C}\{^1\text{H}\}$ -NMR (101 MHz, $\text{CDCl}_3$ ) of 3a

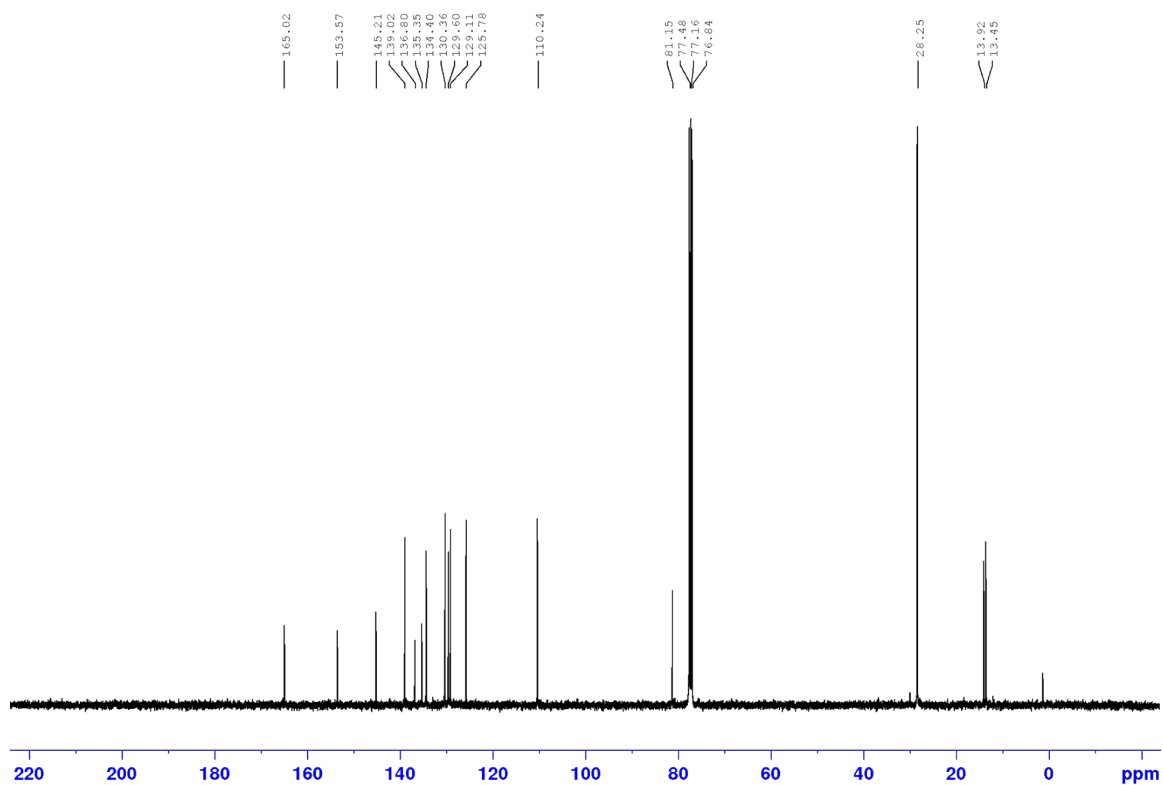

## HRMS of 3a

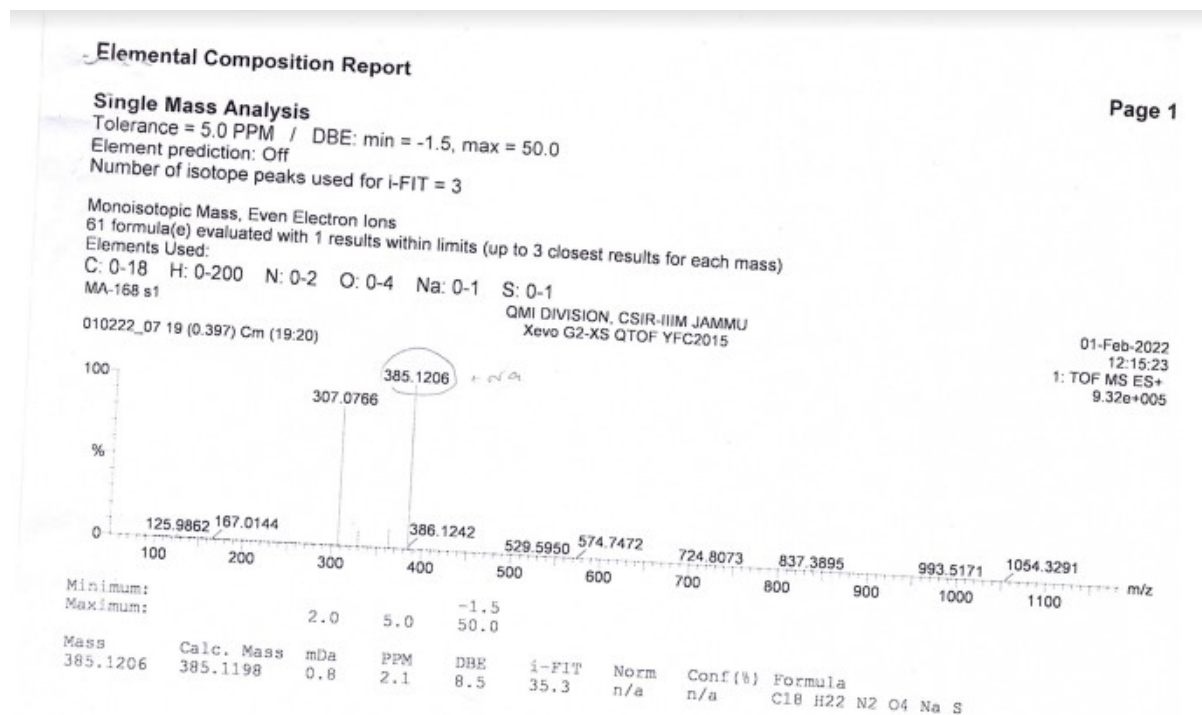

### $^1\text{H-NMR}$ (400 MHz, $\text{CDCl}_3$ ) of **3b**

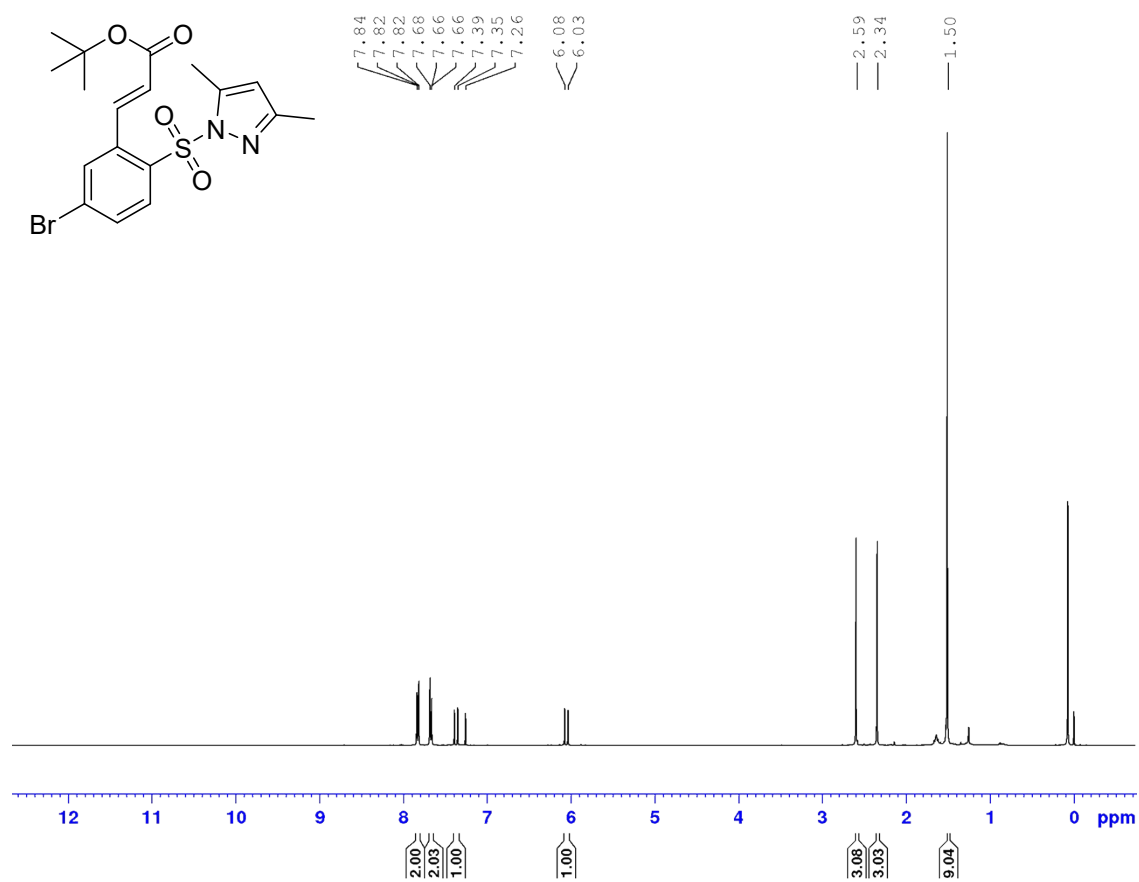

### $^{13}\text{C}\{^1\text{H}\}$ -NMR (101 MHz, $\text{CDCl}_3$ ) of **3b**

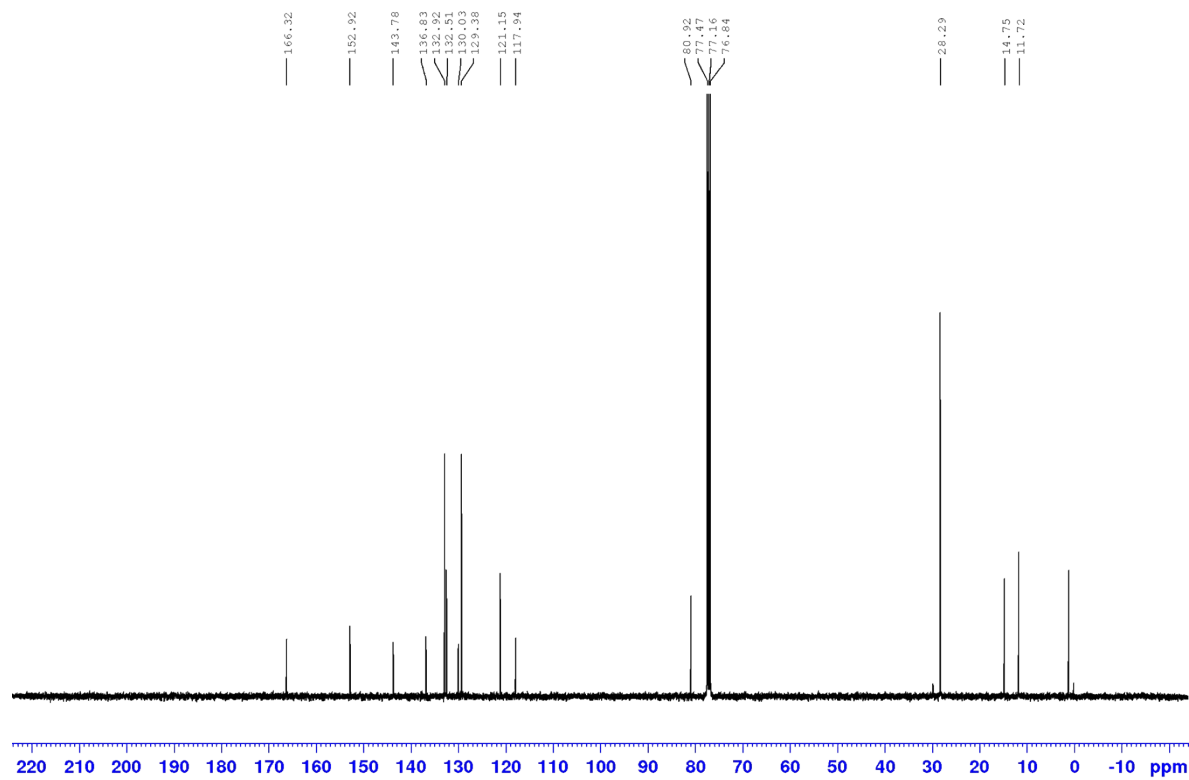



# HRMS of 3b

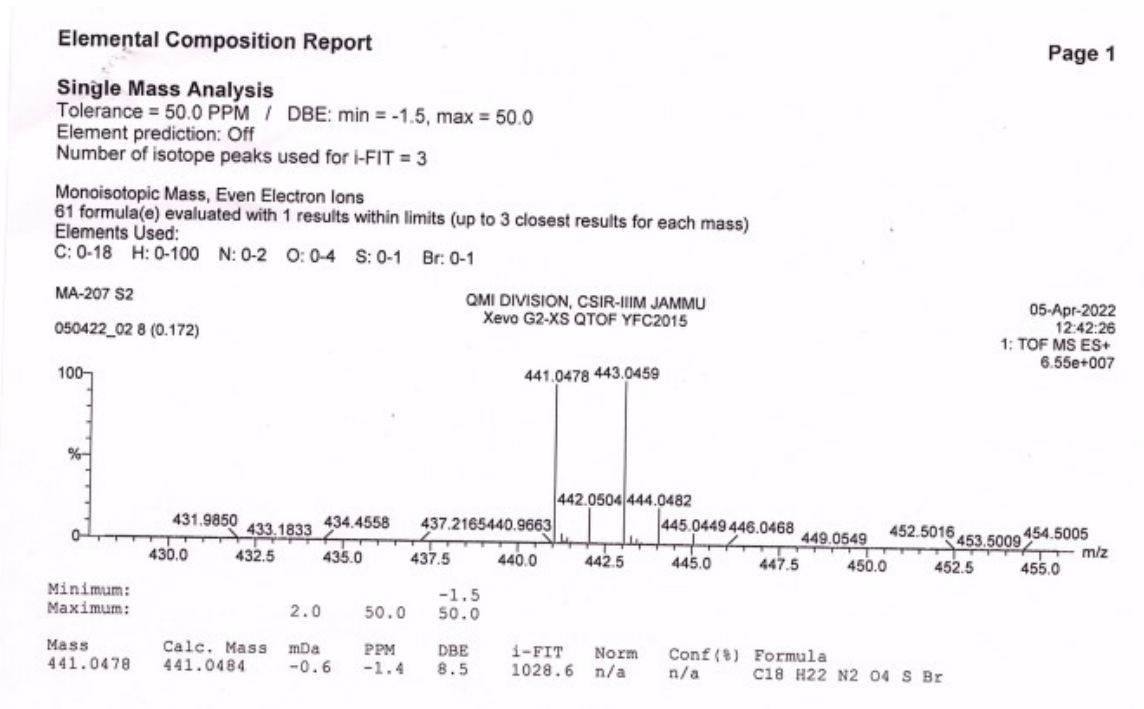

## <sup>1</sup>H-NMR (400 MHz, CDCl<sub>3</sub>) of 3c

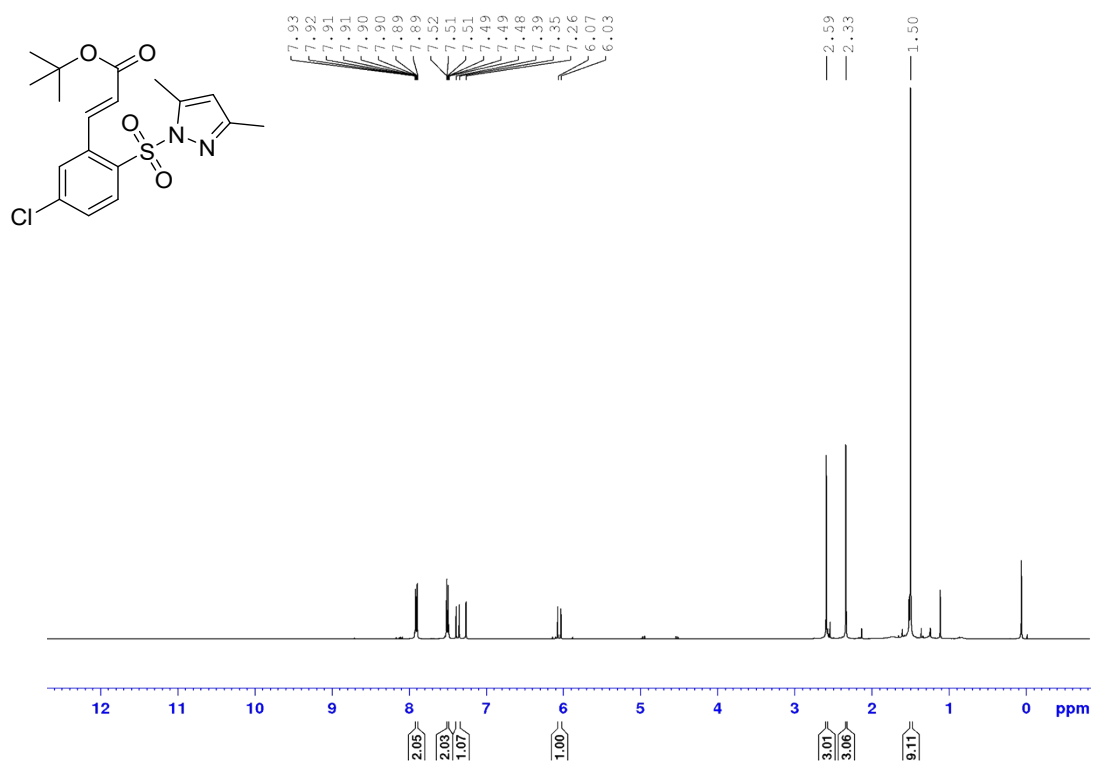

### $^{13}\text{C}\{^1\text{H}\}$ -NMR (101 MHz, $\text{CDCl}_3$ ) of 3c

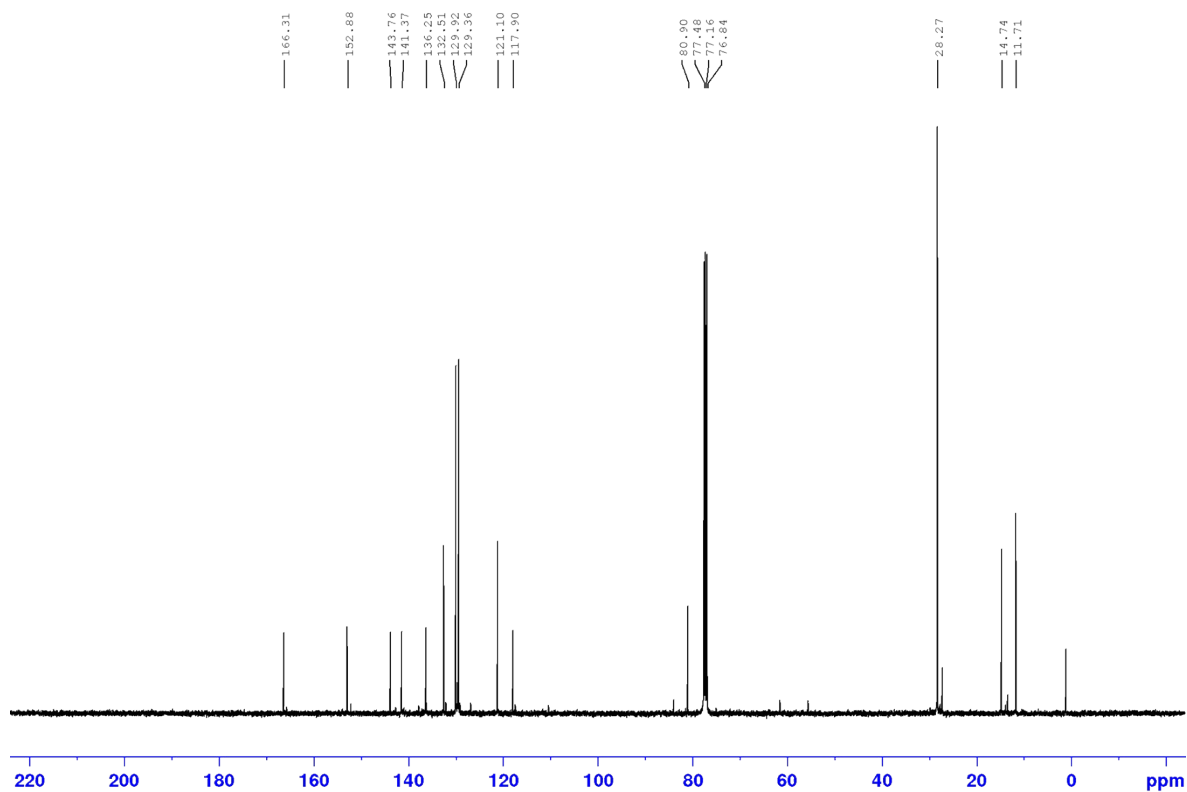

### HRMS of 3c

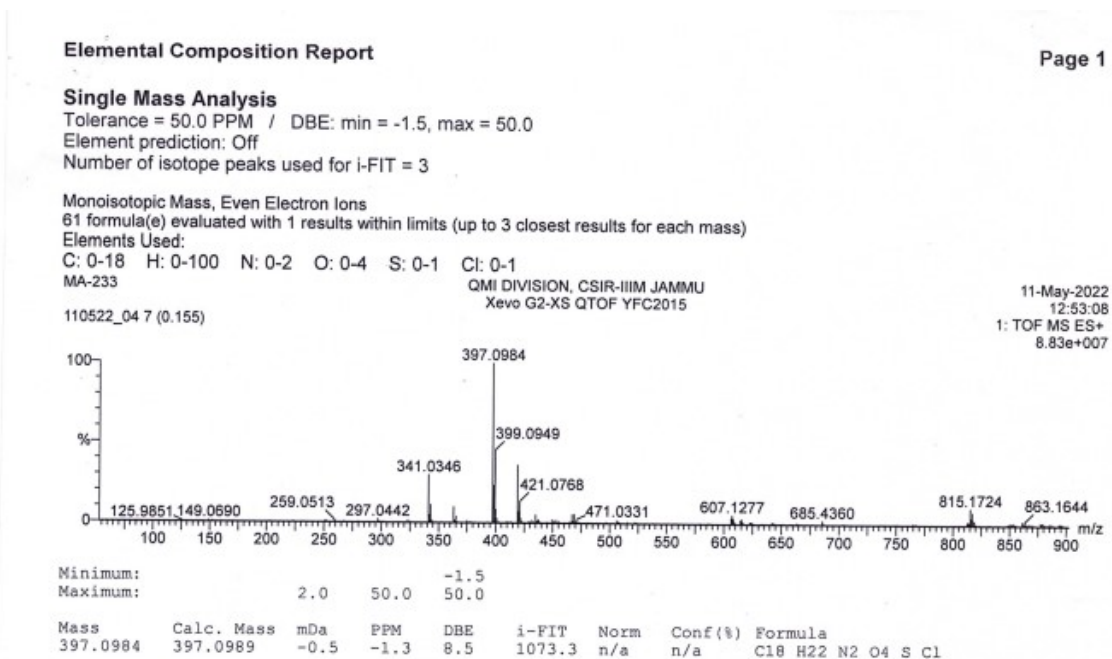

### $^1\text{H-NMR}$ (400 MHz, $\text{CDCl}_3$ ) of 3d

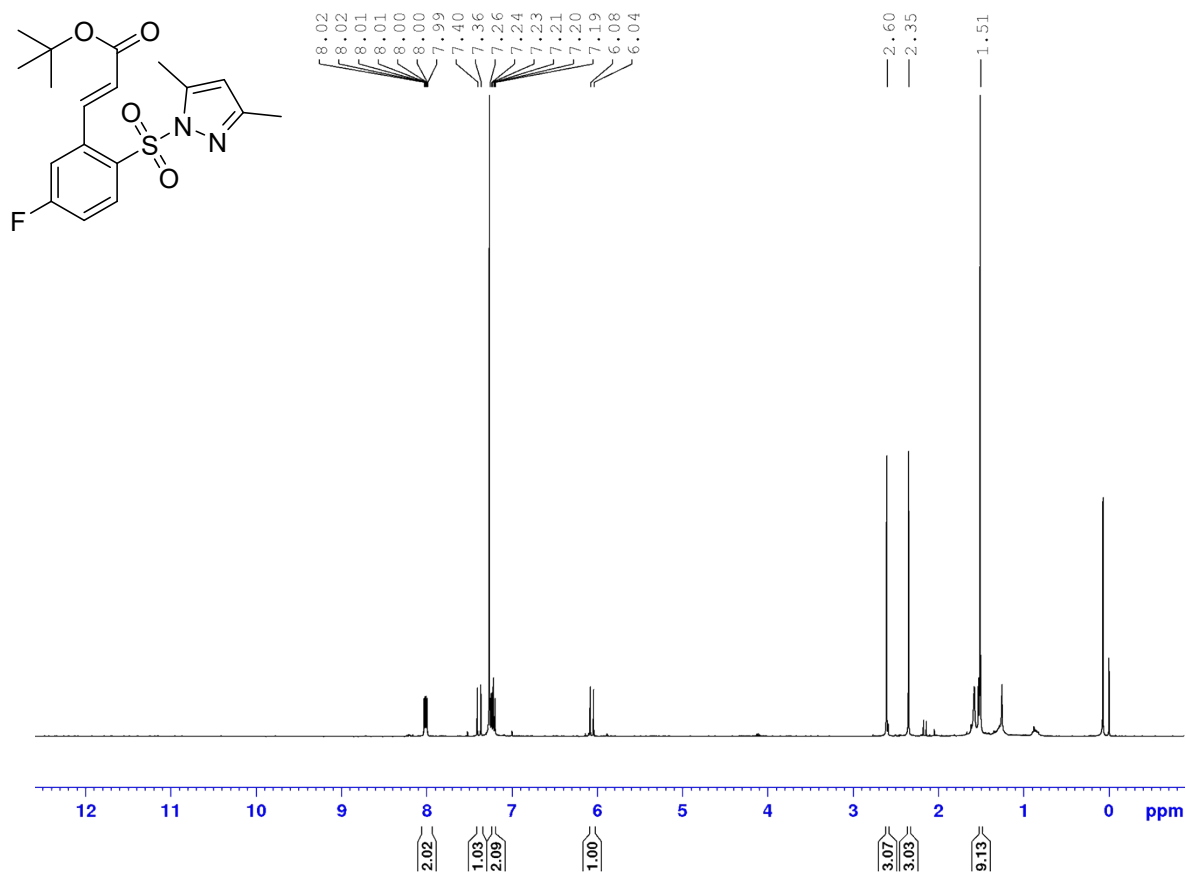

### $^{13}\text{C}\{^1\text{H}\}$ -NMR (101 MHz, $\text{CDCl}_3$ ) of 3d,

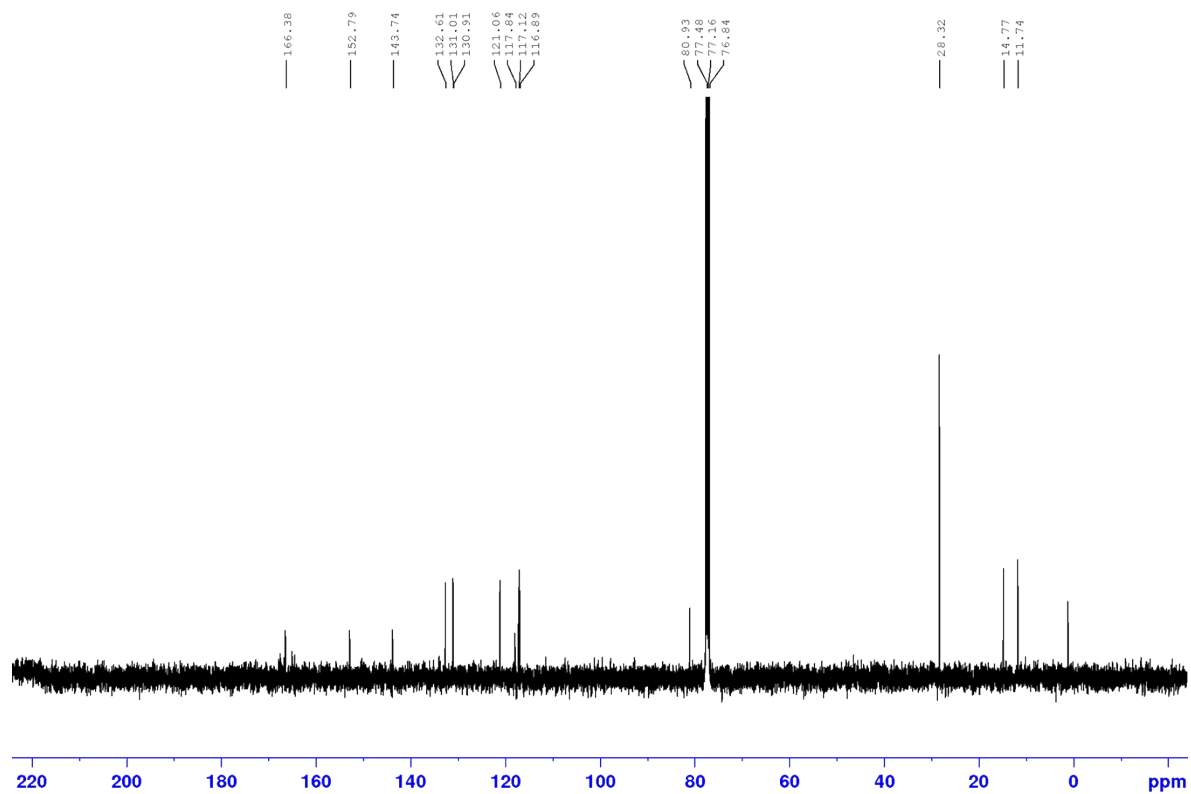

# <sup>19</sup>F-NMR (377 MHz, CDCl<sub>3</sub>) of 3d

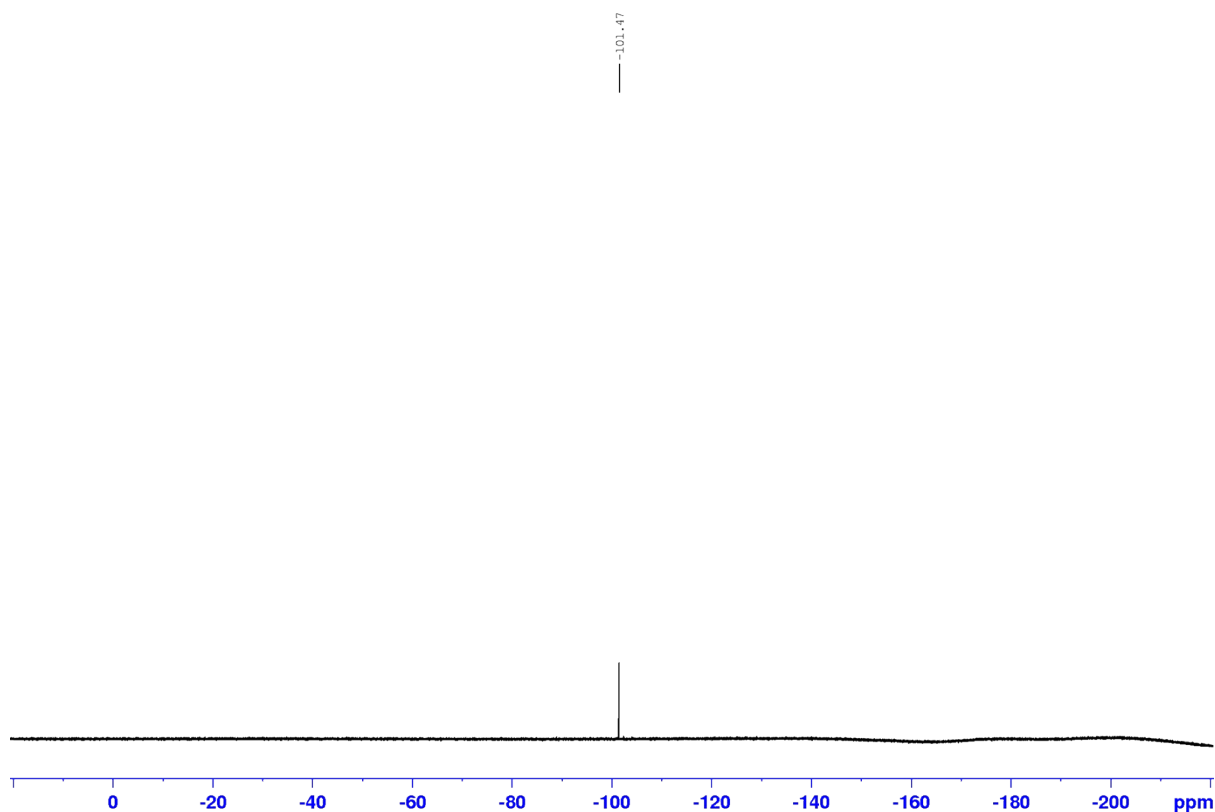

## HRMS of 3d

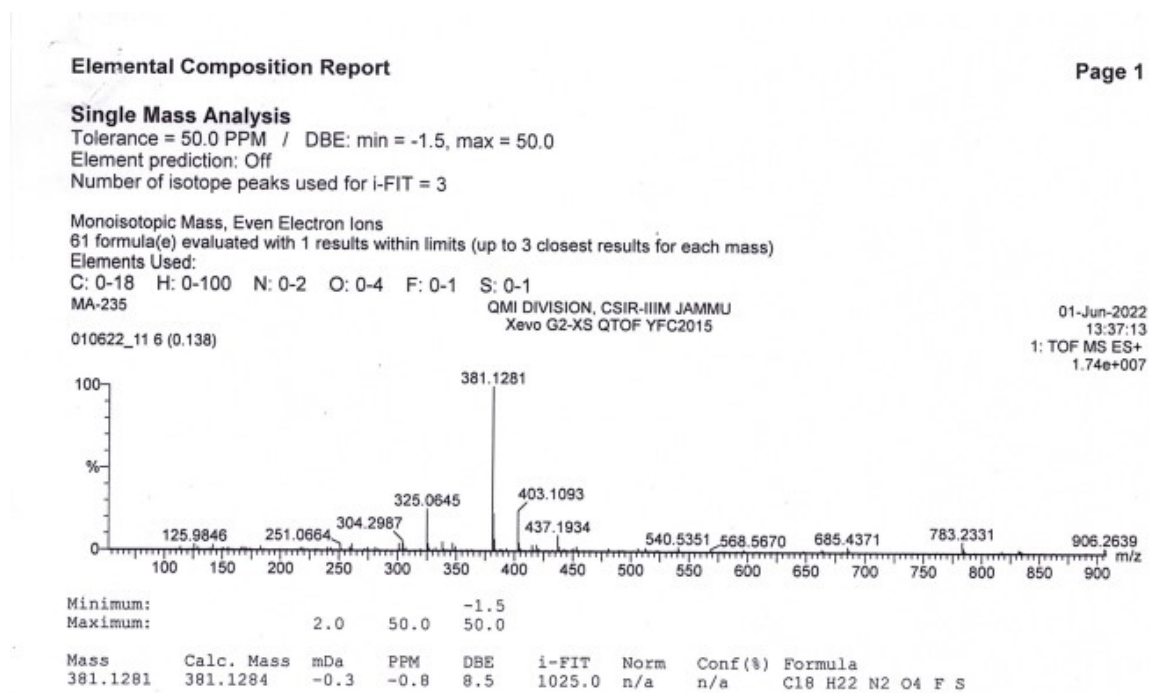

**<sup>1</sup>H-NMR (400 MHz, CDCl<sub>3</sub>) of 3e**

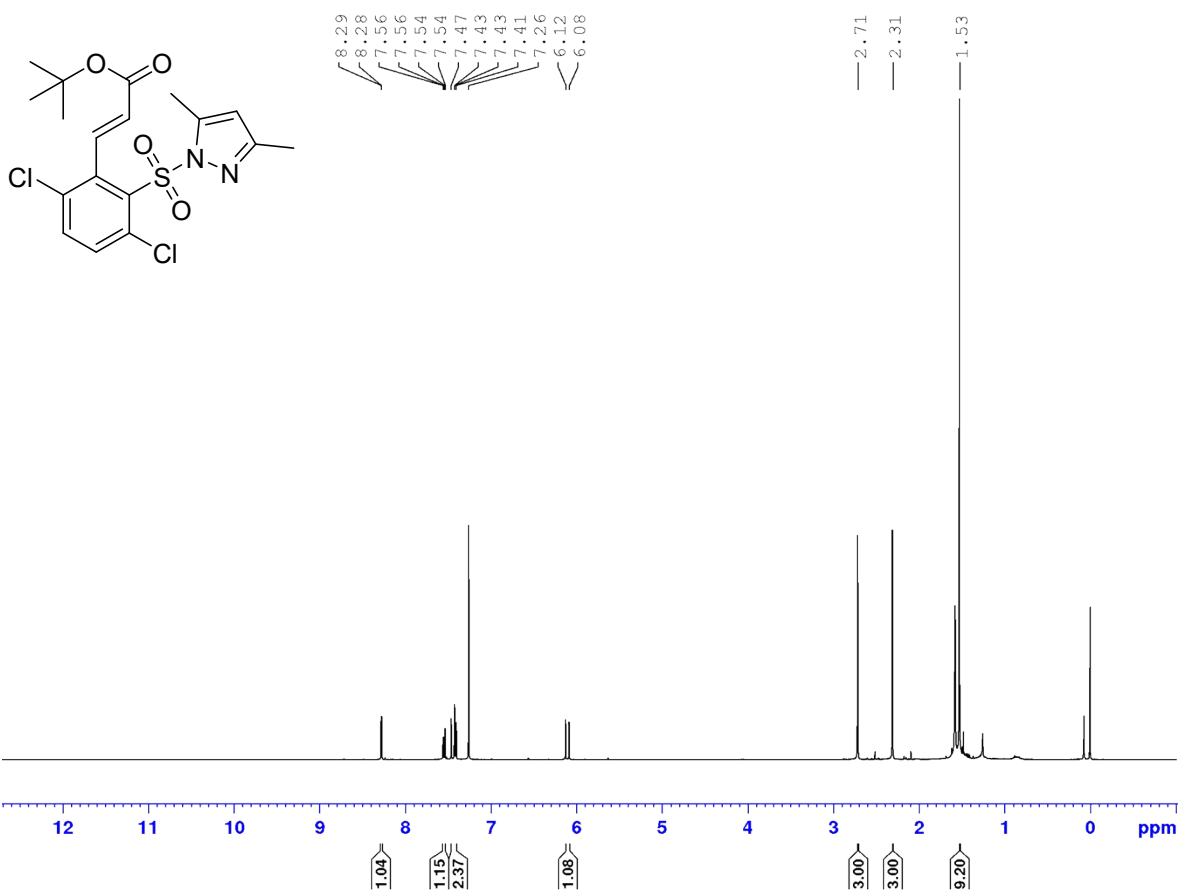

**<sup>13</sup>C{<sup>1</sup>H}-NMR (101 MHz, CDCl<sub>3</sub>) of 3e**

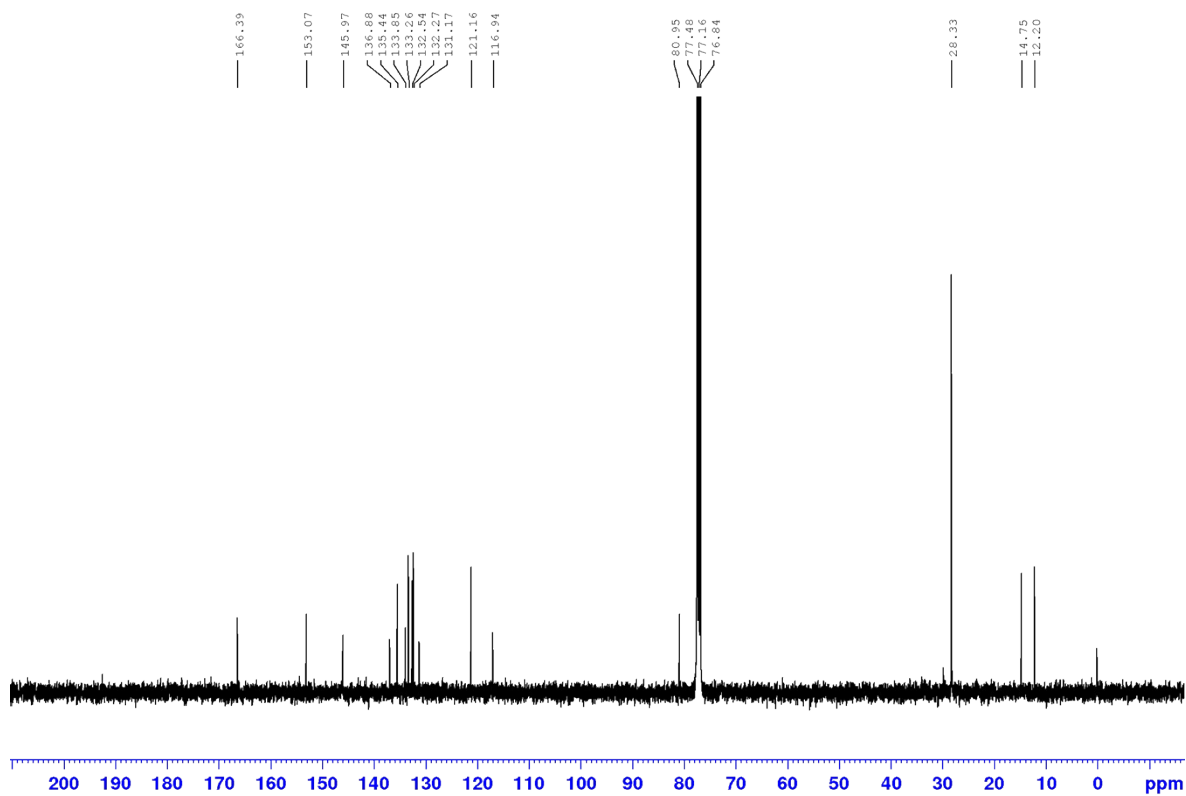

# HRMS of 3e

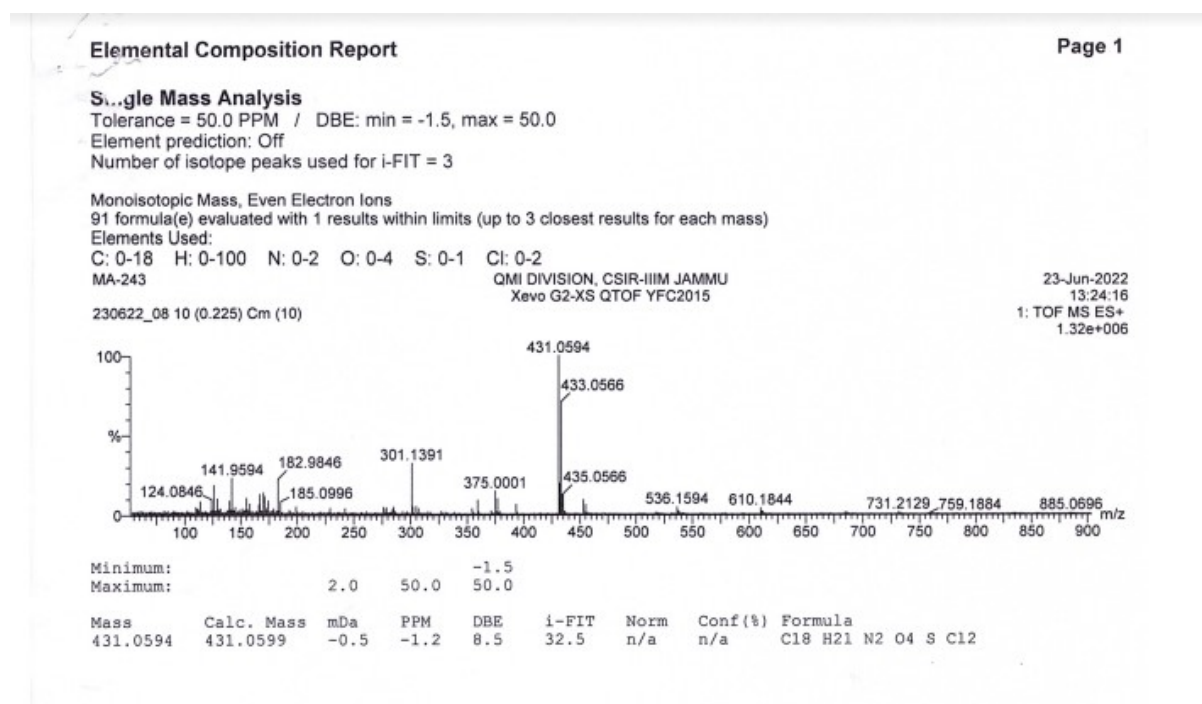

## <sup>1</sup>H-NMR (400 MHz, CDCl<sub>3</sub>) of 3f

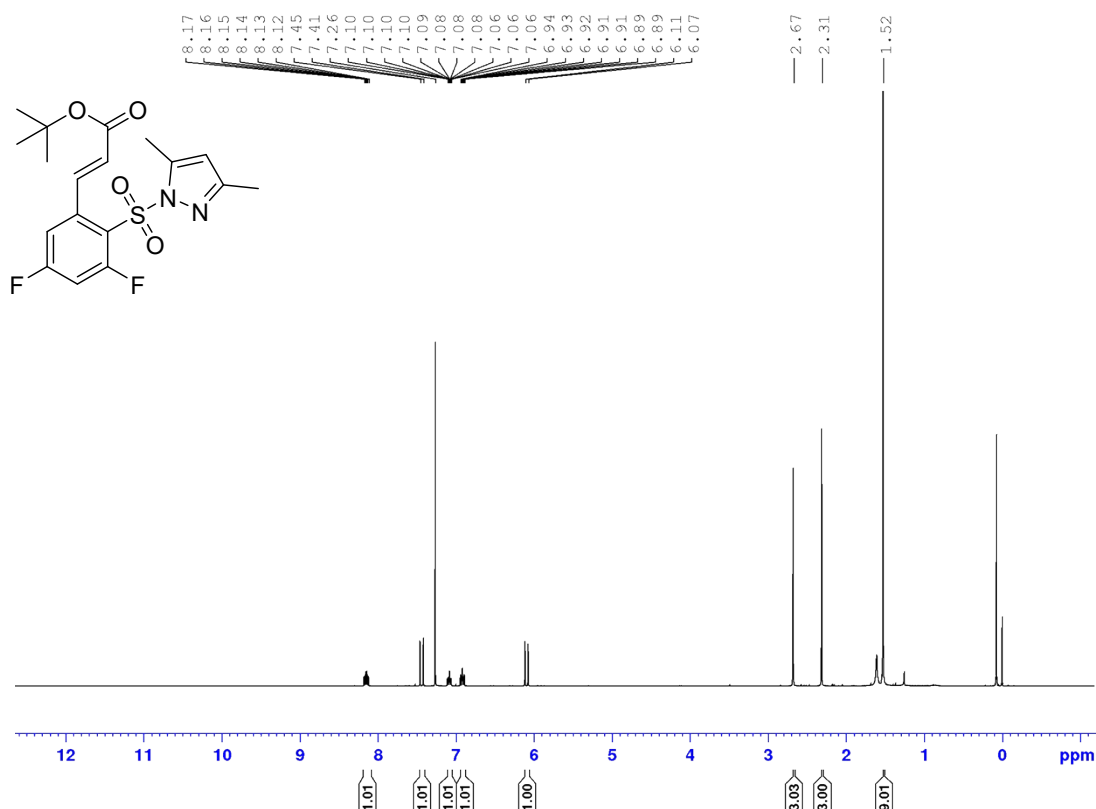

**$^{13}\text{C}\{^1\text{H}\}$ -NMR (101 MHz,  $\text{CDCl}_3$ ) of 3f**

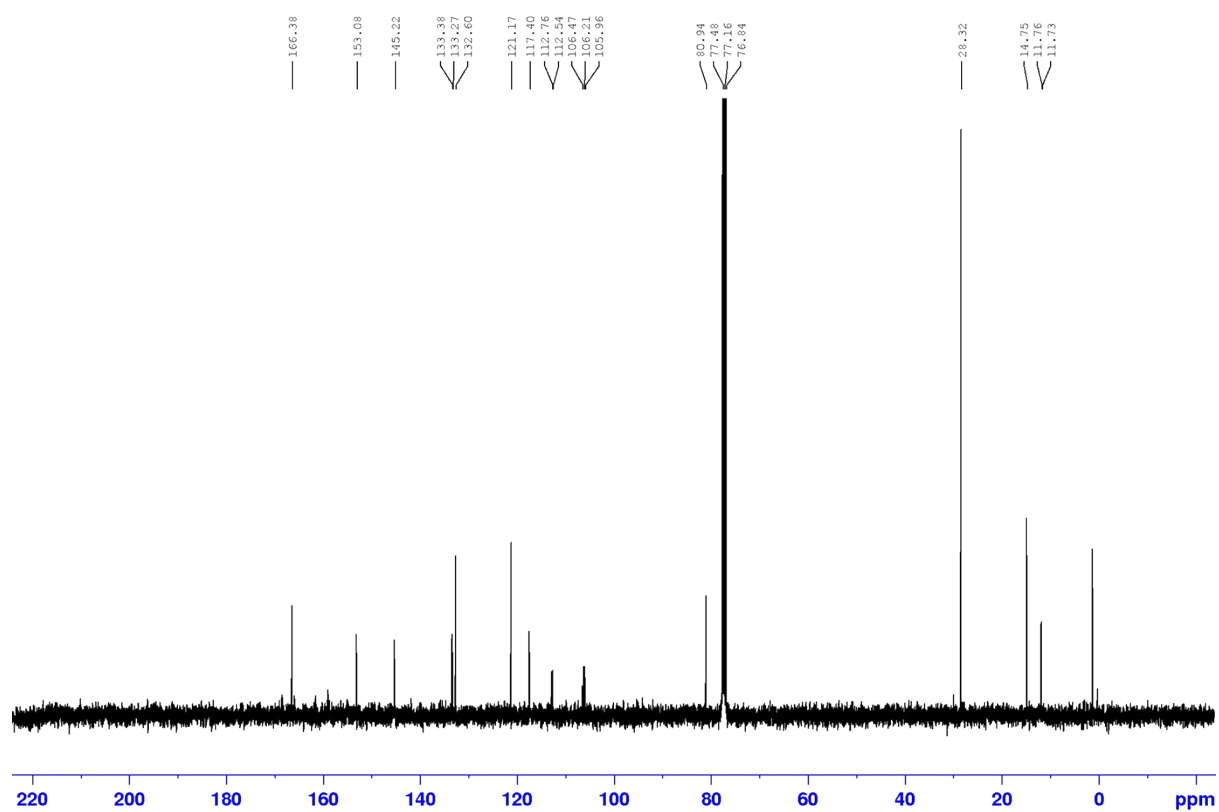

**$^{19}\text{F}$ -NMR (377 MHz,  $\text{CDCl}_3$ ) of 3f**

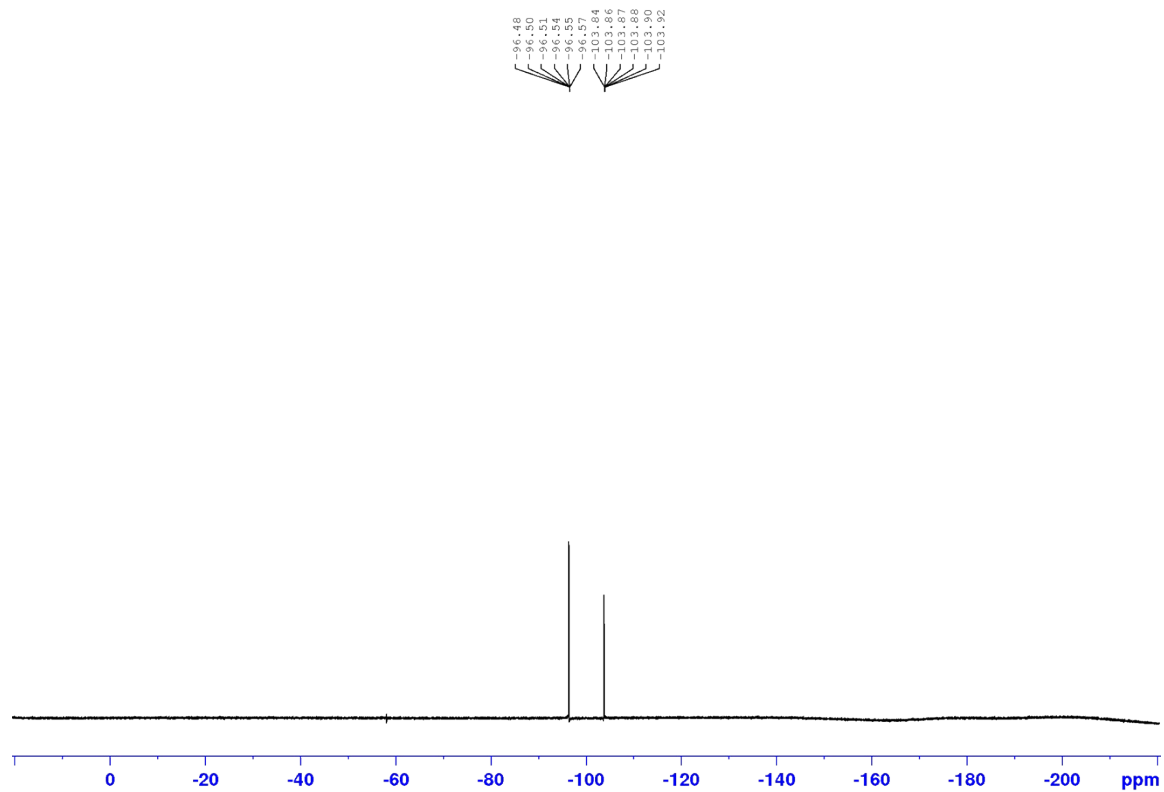

# HRMS of 3f

## Elemental Composition Report

Page 1

### Single Mass Analysis

Tolerance = 50.0 PPM / DBE: min = -1.5, max = 50.0

Element prediction: Off

Number of isotope peaks used for i-FIT = 3

Monoisotopic Mass, Even Electron Ions

91 formula(e) evaluated with 1 results within limits (up to 3 closest results for each mass)

Elements Used:

C: 0-18 H: 0-100 N: 0-2 O: 0-4 F: 0-2 S: 0-1

MA-242

QMI DIVISION, CSIR-IIIM JAMMU  
Xevo G2-XS QTOF YFC2015

240622\_11 10 (0.225) Cm (10:12)

24-Jun-2022

13:33:10

1: TOF MS ES+  
5.72e+006

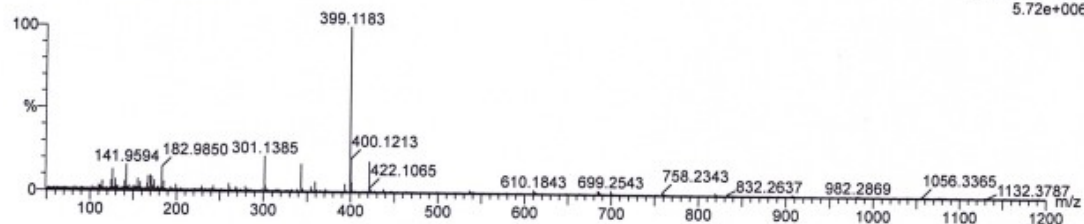

Minimum: -1.5  
Maximum: 2.0 50.0 50.0

| Mass     | Calc. Mass | mDa  | PPM  | DBE | i-FIT | Norm | Conf (%) | Formula            |
|----------|------------|------|------|-----|-------|------|----------|--------------------|
| 399.1183 | 399.1190   | -0.7 | -1.8 | 8.5 | 42.3  | n/a  | n/a      | C18 H21 N2 O4 F2 S |

## <sup>1</sup>H-NMR (400 MHz, CDCl<sub>3</sub>) of 3g

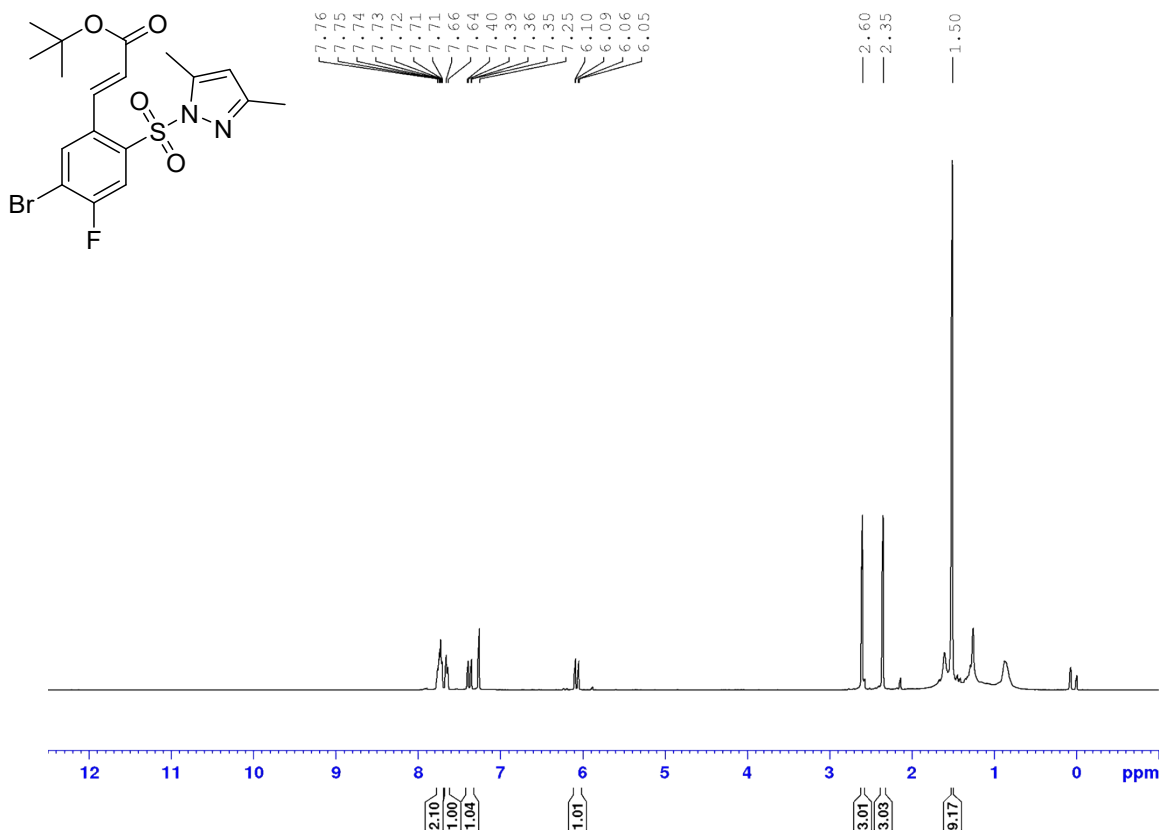



**$^{13}\text{C}\{^1\text{H}\}$ -NMR (101 MHz,  $\text{CDCl}_3$ ) of 3g**

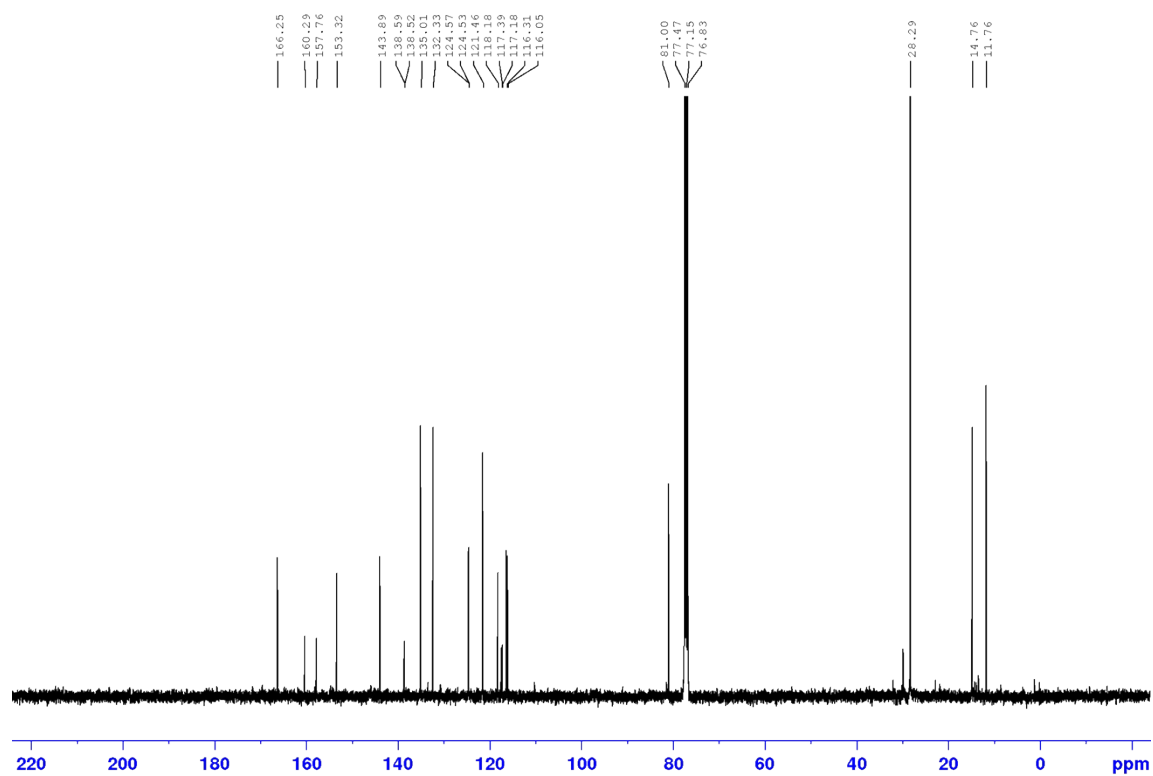

**$^{19}\text{F}$ -NMR (377 MHz,  $\text{CDCl}_3$ ) of 3g**

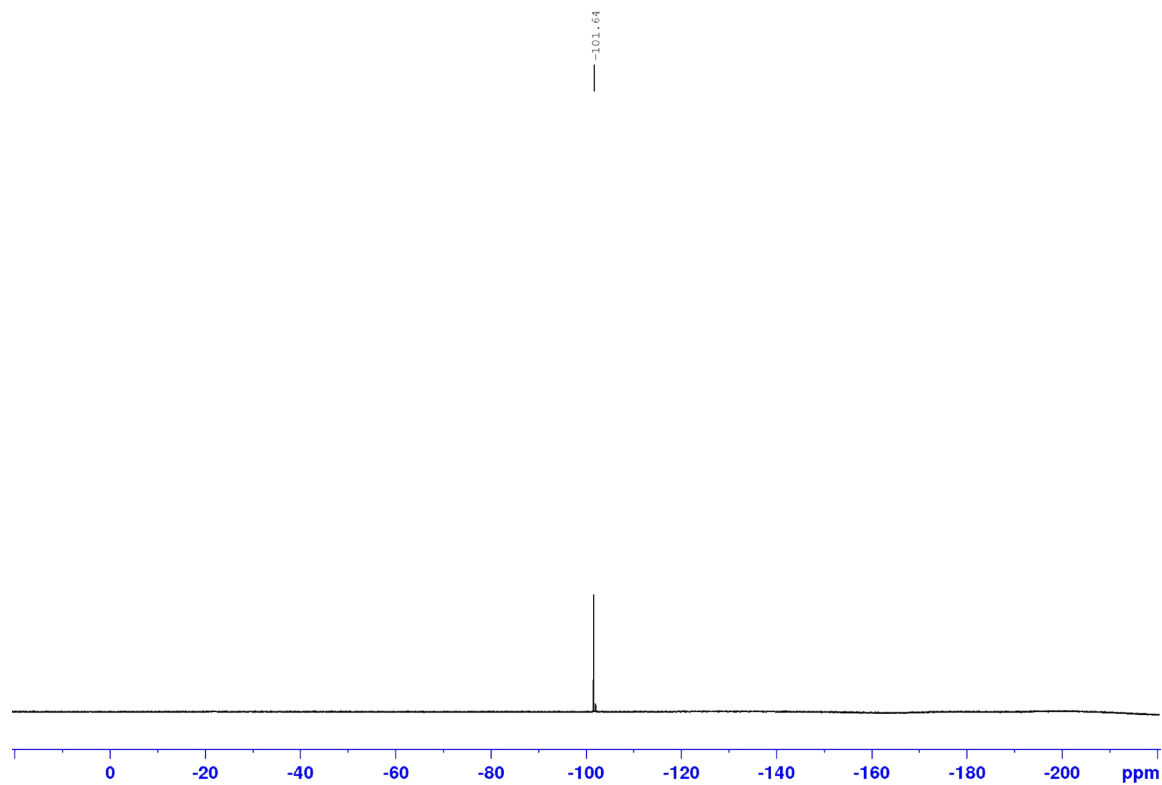

# HRMS of 3g

## Elemental Composition Report

Page 1

### Single Mass Analysis

Tolerance = 50.0 PPM / DBE: min = -1.5, max = 50.0

Element prediction: Off

Number of isotope peaks used for i-FIT = 3

Monoisotopic Mass, Even Electron Ions

121 formula(e) evaluated with 1 results within limits (up to 3 closest results for each mass)

Elements Used:

C: 0-18 H: 0-100 N: 0-2 O: 0-4 F: 0-1 S: 0-1 Br: 0-1

MA-249

QMI DIVISION, CSIR-IIIM JAMMU  
Xevo G2-XS QTOF YFC2015

18-Aug-2022

11:17:11

180822\_06 6 (0.138)

1: TOF MS ES+  
2.63e+007

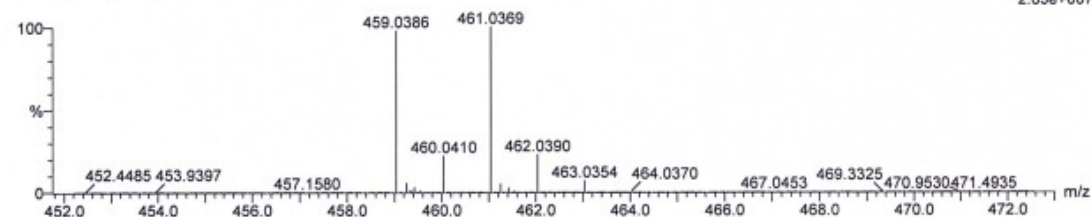

Minimum: -1.5  
Maximum: 2.0 50.0 50.0

| Mass     | Calc. Mass | mDa  | PPM  | DBE | i-FIT | Norm | Conf(%) | Formula              |
|----------|------------|------|------|-----|-------|------|---------|----------------------|
| 459.0386 | 459.0389   | -0.3 | -0.7 | 8.5 | 866.1 | n/a  | n/a     | C18 H21 N2 O4 F S Br |

## <sup>1</sup>H-NMR (400 MHz, CDCl<sub>3</sub>) of 3h

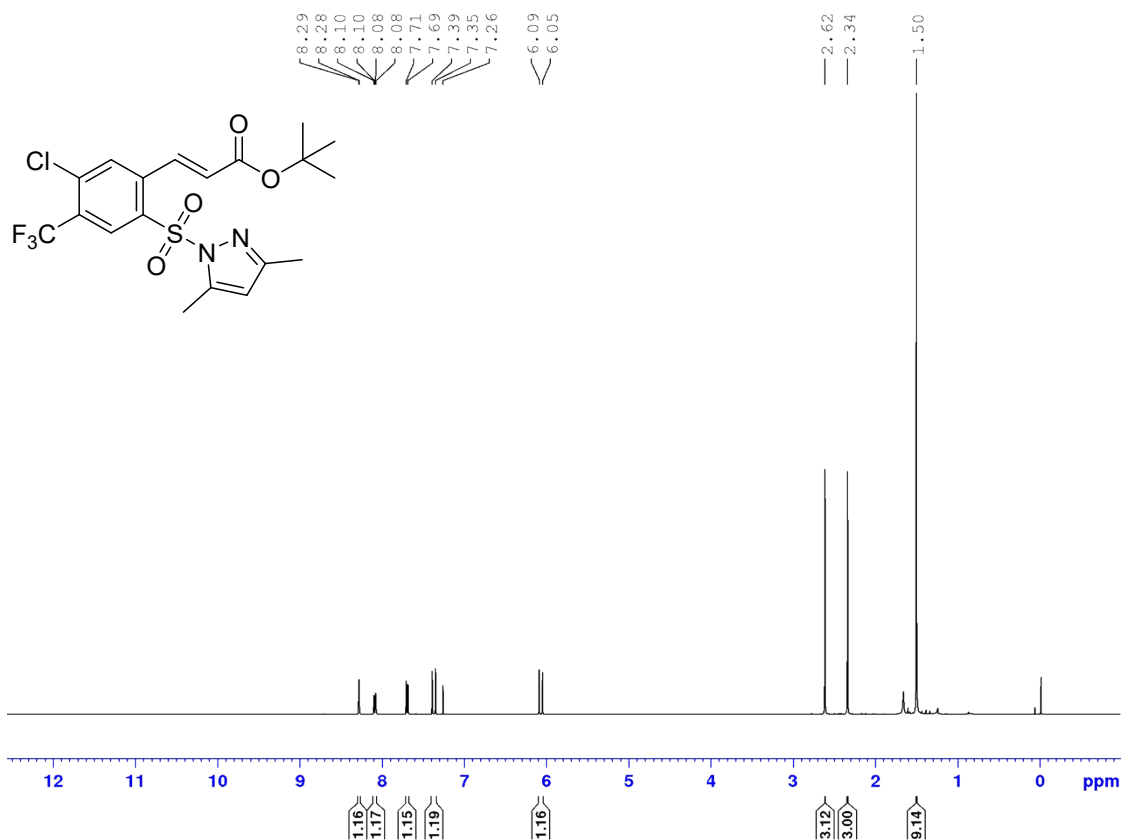

## <sup>13</sup>C{<sup>1</sup>H}-NMR (101 MHz, CDCl<sub>3</sub>) of 3h

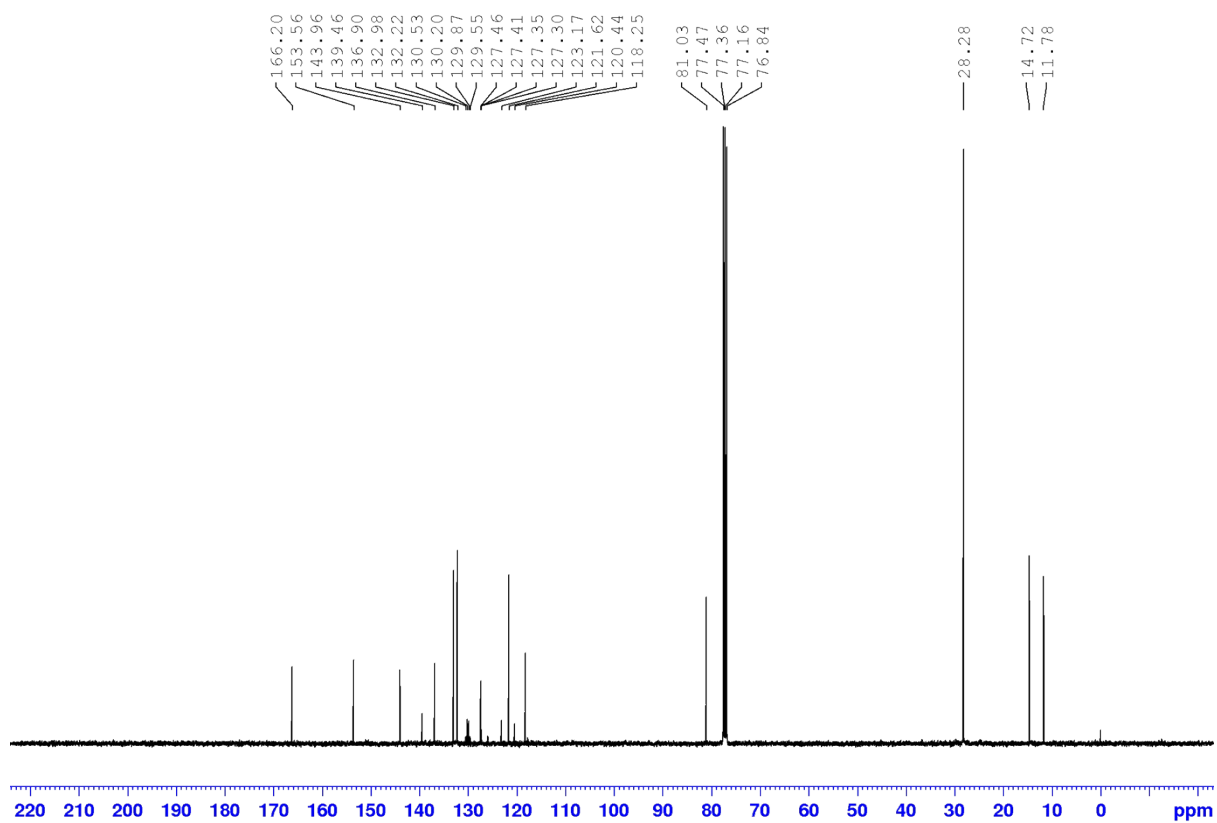

**<sup>19</sup>F-NMR (377 MHz, CDCl<sub>3</sub>) of 3h**

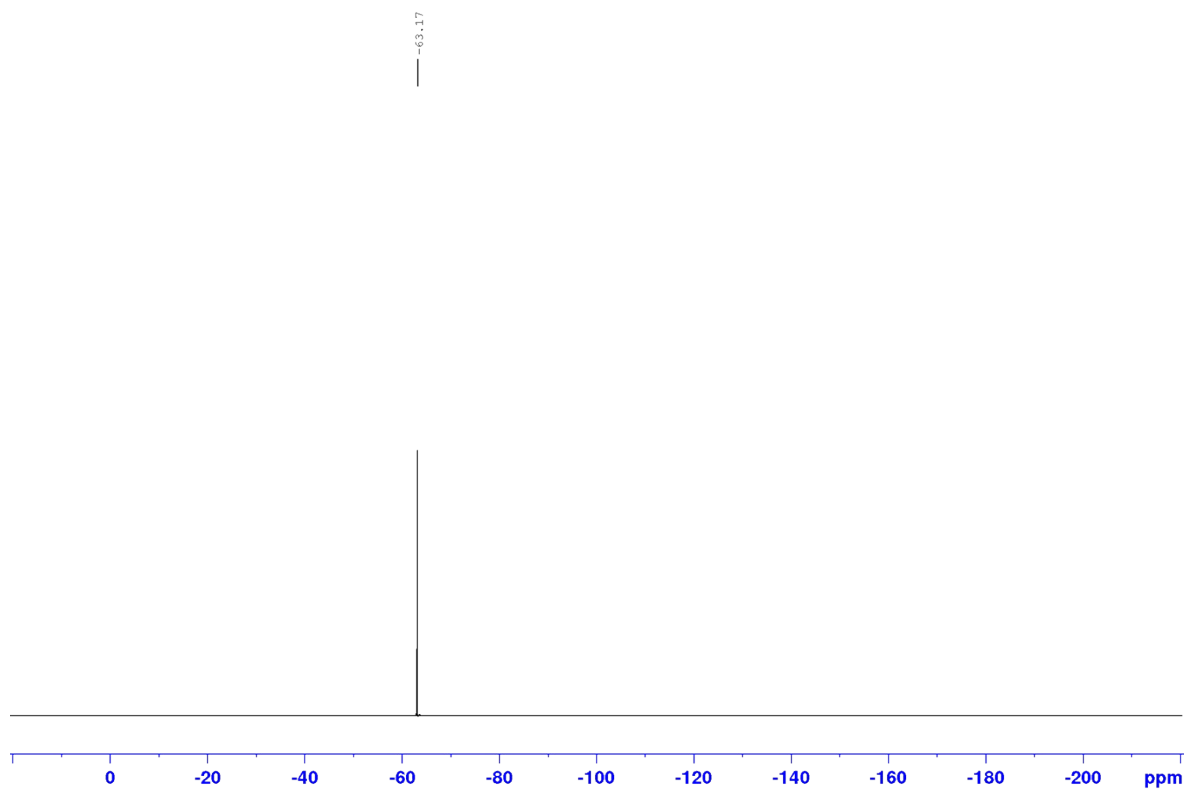

**HRMS of 3h**

Elemental Composition Report

Single Mass Analysis

Tolerance = 50.0 PPM / DBE: min = -1.5, max = 50.0  
 Element prediction: Off  
 Number of isotope peaks used for i-FIT = 3

Monoisotopic Mass, Even Electron Ions

241 formula(e) evaluated with 1 results within limits (up to 3 closest results for each mass)

Elements Used:

C: 0-19 H: 0-100 N: 0-2 O: 0-4 F: 0-3 S: 0-1 Cl: 0-1

MA-250

QMI DIVISION, CSIR-IIIM JAMMU  
 Xevo G2-XS QTOF YFC2015

050822\_02 10 (0.225)

05-Aug-2022  
 14:01:53  
 1: TOF MS ES+  
 1.65e+007

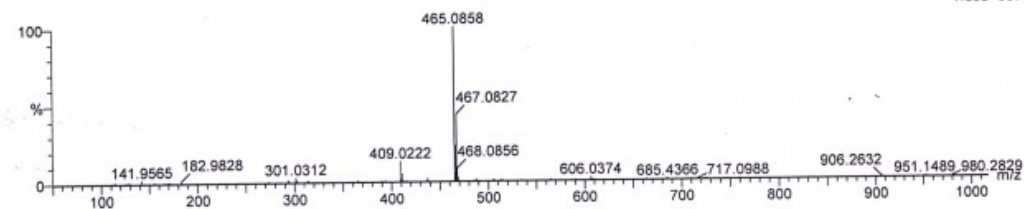

Minimum: -1.5  
 Maximum: 2.0 50.0 50.0

| Mass     | Calc. Mass | mDa  | PPM  | DBE | i-FIT | Norm | Conf (%) | Formula               |
|----------|------------|------|------|-----|-------|------|----------|-----------------------|
| 465.0858 | 465.0863   | -0.5 | -1.1 | 8.5 | 735.4 | n/a  | n/a      | C19 H21 N2 O4 F3 S Cl |

<sup>1</sup>H-NMR (400 MHz, CDCl<sub>3</sub>) of 3i

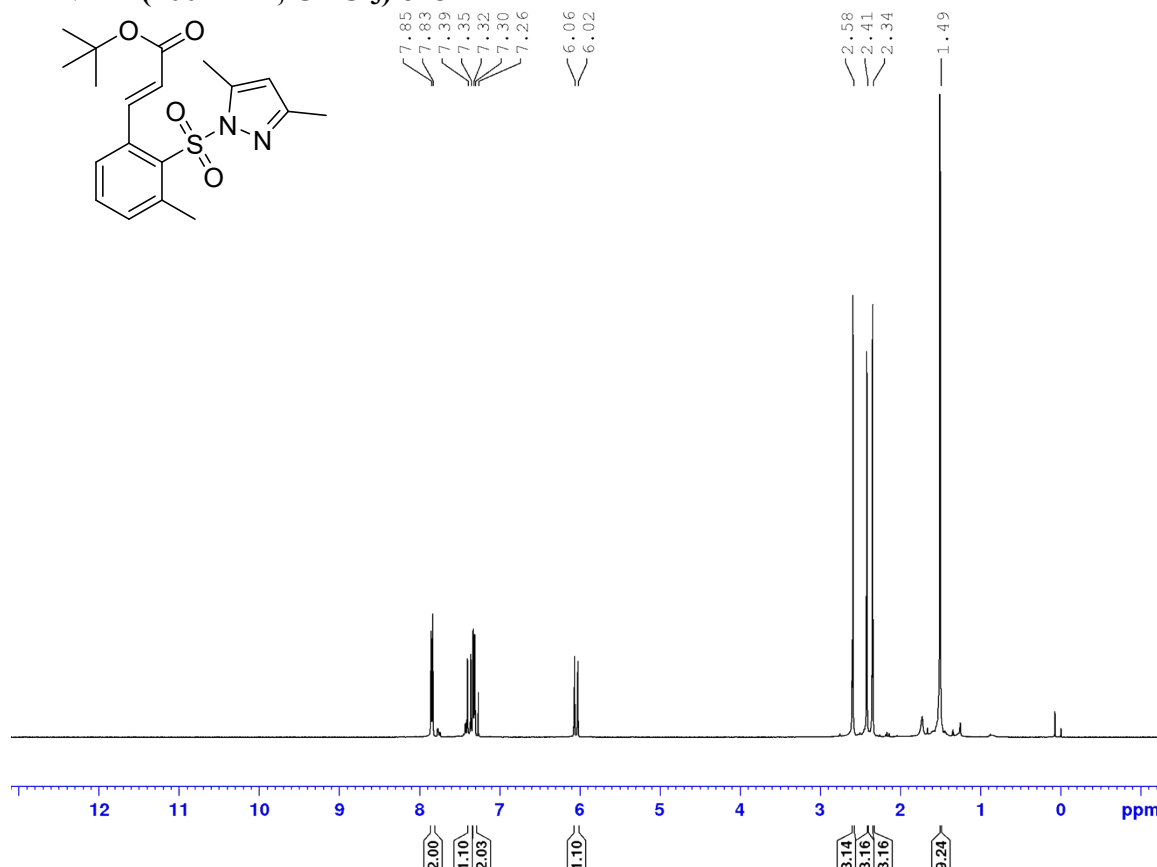

<sup>13</sup>C{<sup>1</sup>H}-NMR (101 MHz, CDCl<sub>3</sub>) of 3i

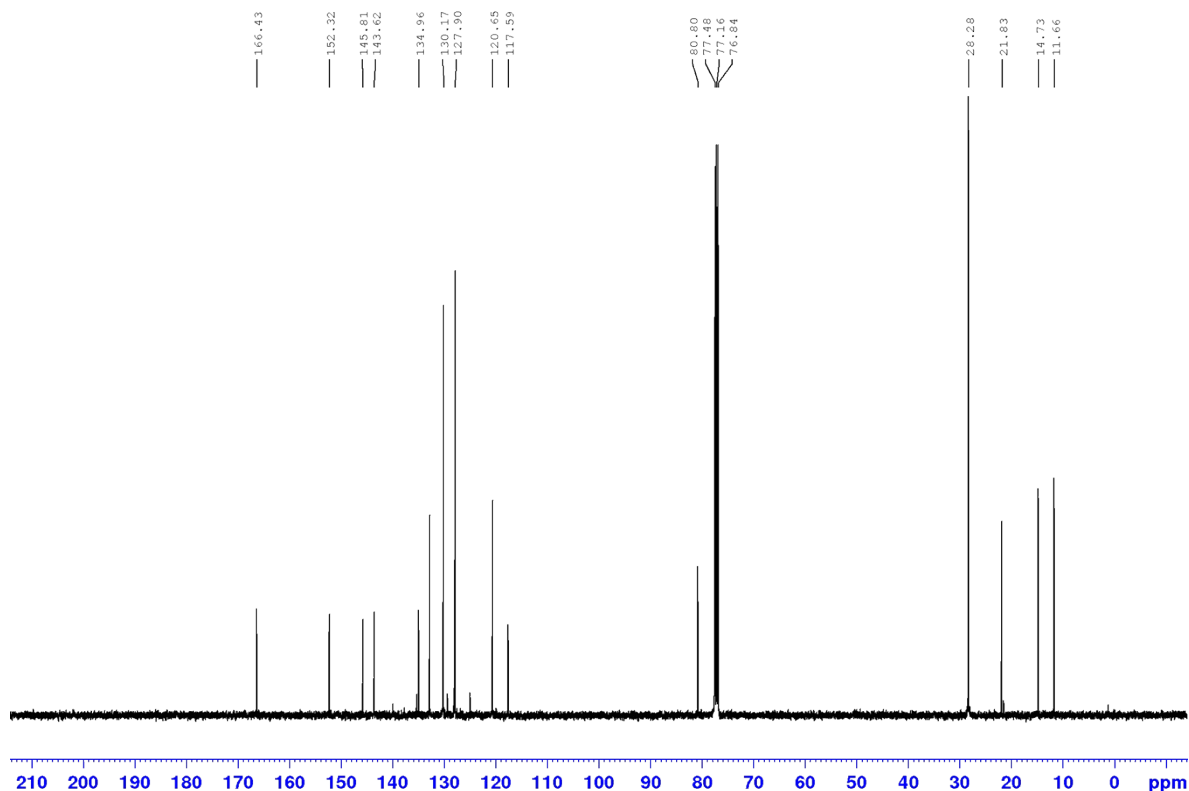

## HRMS of 3i

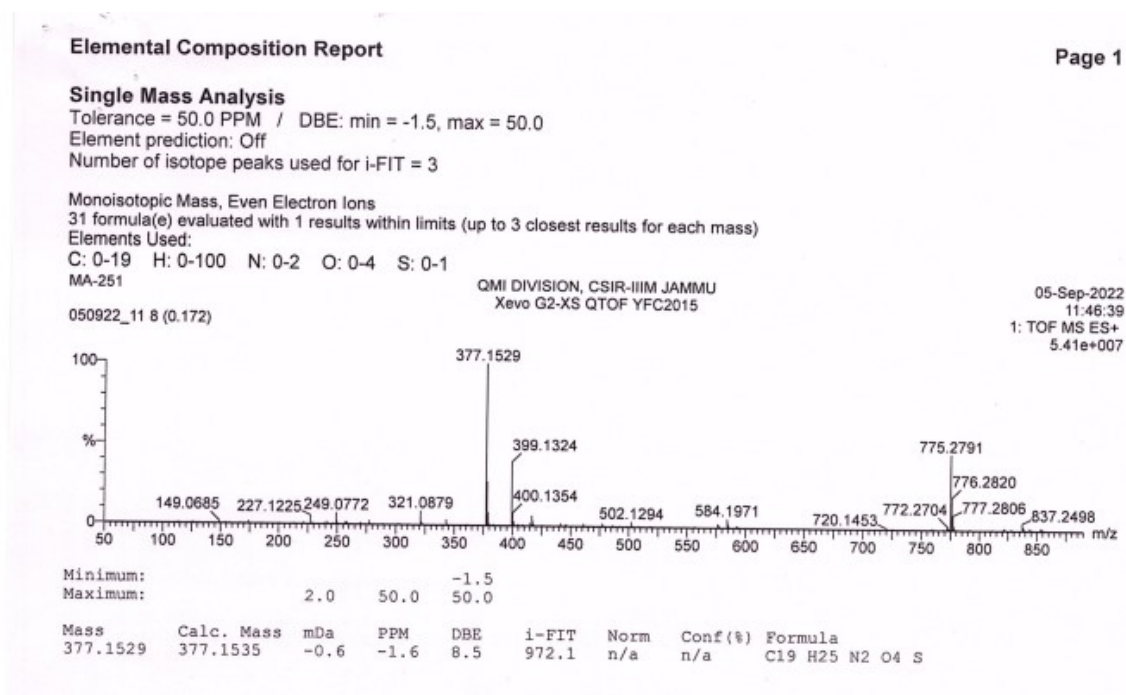

## <sup>1</sup>H-NMR (400 MHz, CDCl<sub>3</sub>) of 3j

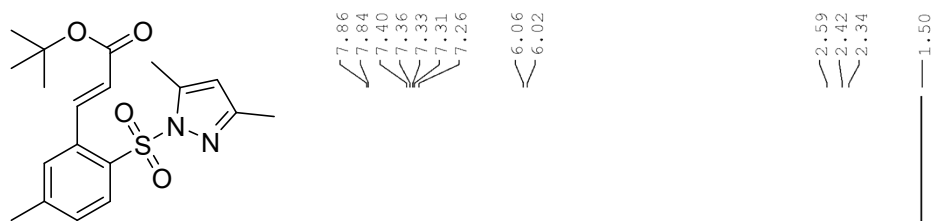

**$^{13}\text{C}\{^1\text{H}\}$ -NMR (101 MHz,  $\text{CDCl}_3$ ) of 3j**

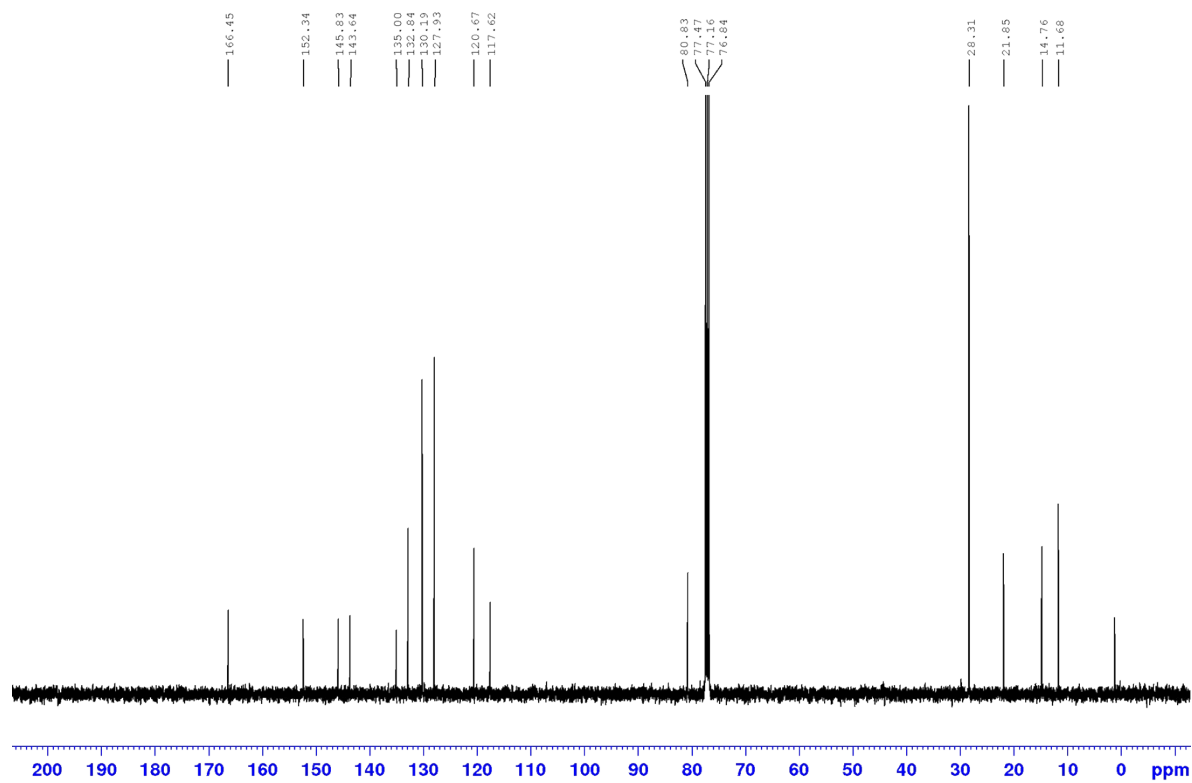

**HRMS of 3j**

## Elemental Composition Report

Page 1

### Single Mass Analysis

Tolerance = 50.0 PPM / DBE: min = -1.5, max = 50.0

Element prediction: Off

Number of isotope peaks used for i-FIT = 3

Monoisotopic Mass, Even Electron Ions

31 formula(e) evaluated with 1 results within limits (up to 3 closest results for each mass)

Elements Used:

C: 0-19 H: 0-100 N: 0-2 O: 0-4 S: 0-1

MA-237

QMI DIVISION, CSIR-IIIM JAMMU  
Xevo G2-XS QTOF YFC2015

23-May-2022  
12:35:48  
1: TOF MS ES+  
5.28e+007

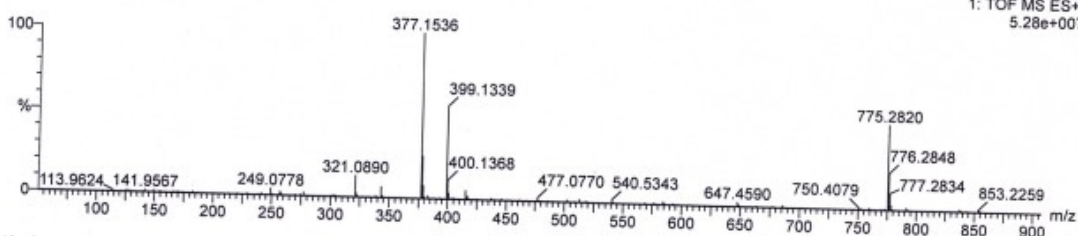

Minimum: -1.5  
Maximum: 2.0 50.0 50.0

| Mass     | Calc. Mass | mDa | PPM | DBE | i-FIT  | Norm | Conf (%) | Formula         |
|----------|------------|-----|-----|-----|--------|------|----------|-----------------|
| 377.1536 | 377.1535   | 0.1 | 0.3 | 8.5 | 1139.9 | n/a  | n/a      | C19 H25 N2 O4 S |

### <sup>1</sup>H-NMR (400 MHz, CDCl<sub>3</sub>) of 3k

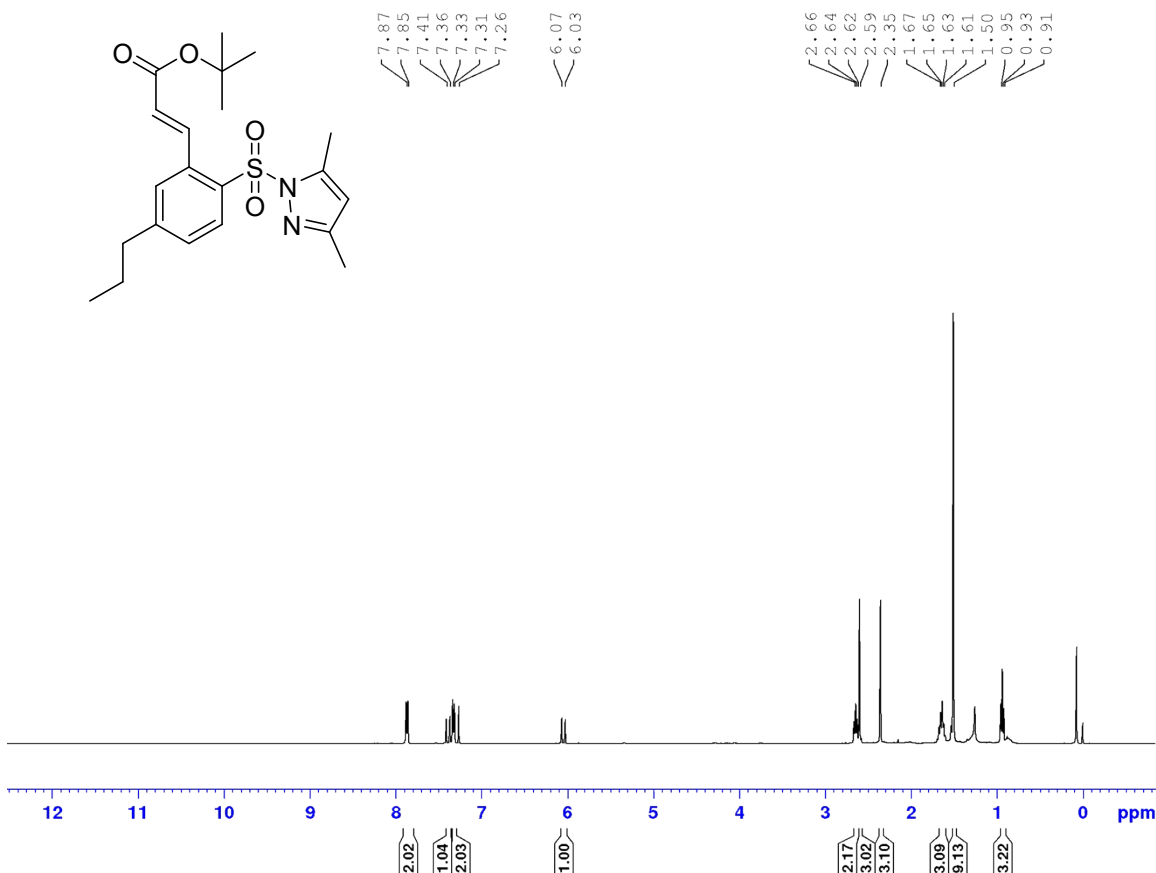

### <sup>13</sup>C{<sup>1</sup>H}-NMR (101 MHz, CDCl<sub>3</sub>) of 3k

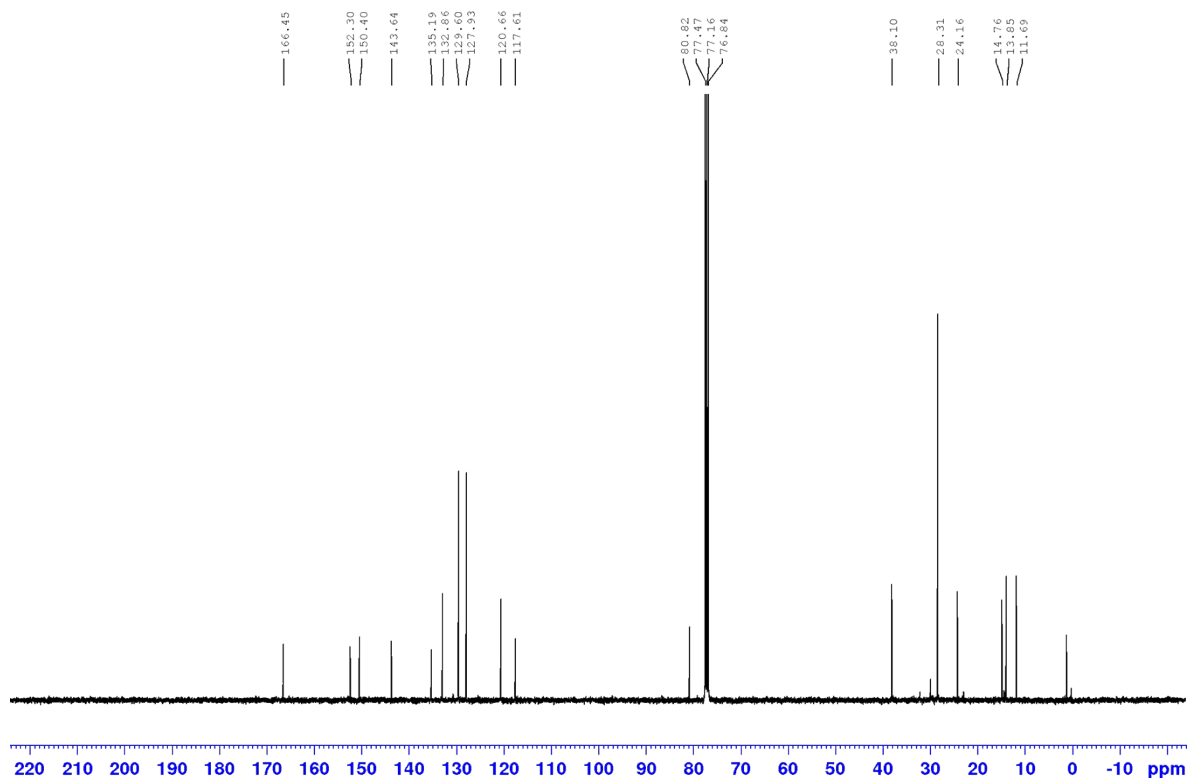

## HRMS of 3k

### Elemental Composition Report

Page 1

#### Single Mass Analysis

Tolerance = 20.0 PPM / DBE: min = -1.5, max = 50.0

Element prediction: Off

Number of isotope peaks used for i-FIT = 3

Monoisotopic Mass, Even Electron Ions

31 formula(e) evaluated with 1 results within limits (up to 3 closest results for each mass)

Elements Used:

C: 0-21 H: 0-100 N: 0-2 O: 0-4 S: 0-1

MA-231

QMI DIVISION, CSIR-IIIM JAMMU  
Xevo G2-XS QTOF YFC2015

02-May-2022

11:50:25

1: TOF MS ES+

3.61e+007

020522\_12 8 (0.172)

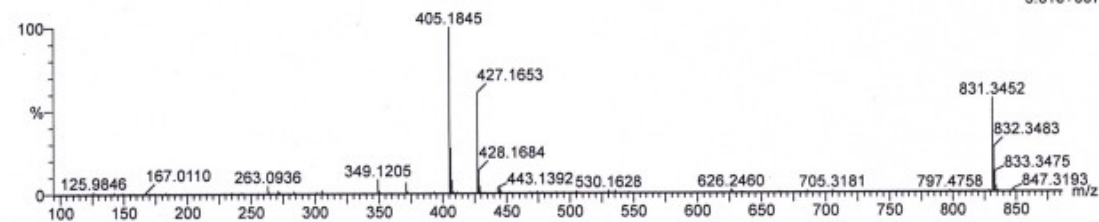

Minimum: -1.5  
Maximum: 2.0 20.0 50.0

| Mass     | Calc. Mass | mDa  | PPM  | DBE | i-FIT | Norm | Conf (%) | Formula         |
|----------|------------|------|------|-----|-------|------|----------|-----------------|
| 405.1845 | 405.1848   | -0.3 | -0.7 | 8.5 | 989.2 | n/a  | n/a      | C21 H29 N2 O4 S |

## <sup>1</sup>H-NMR (400 MHz, CDCl<sub>3</sub>) of 3l



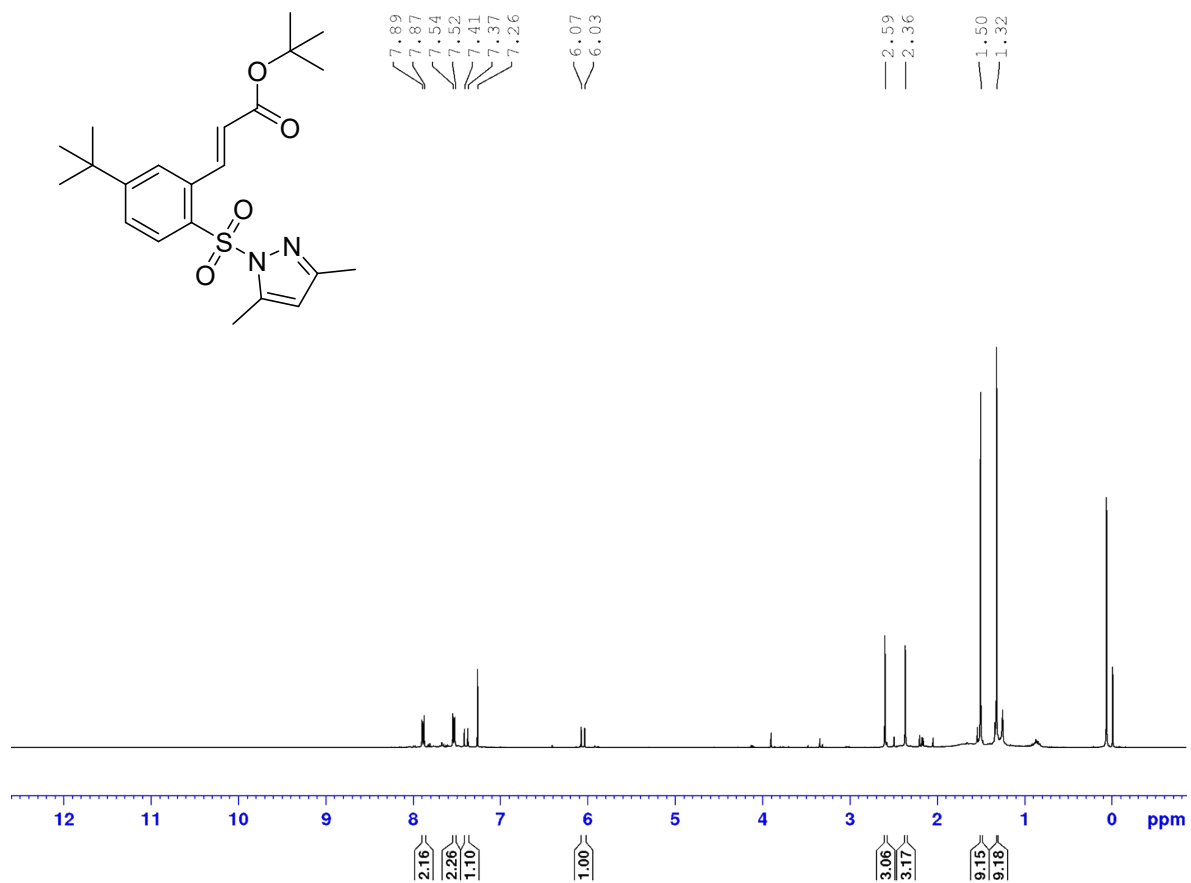

**<sup>13</sup>C{<sup>1</sup>H}-NMR (101 MHz, CDCl<sub>3</sub>) of 31**

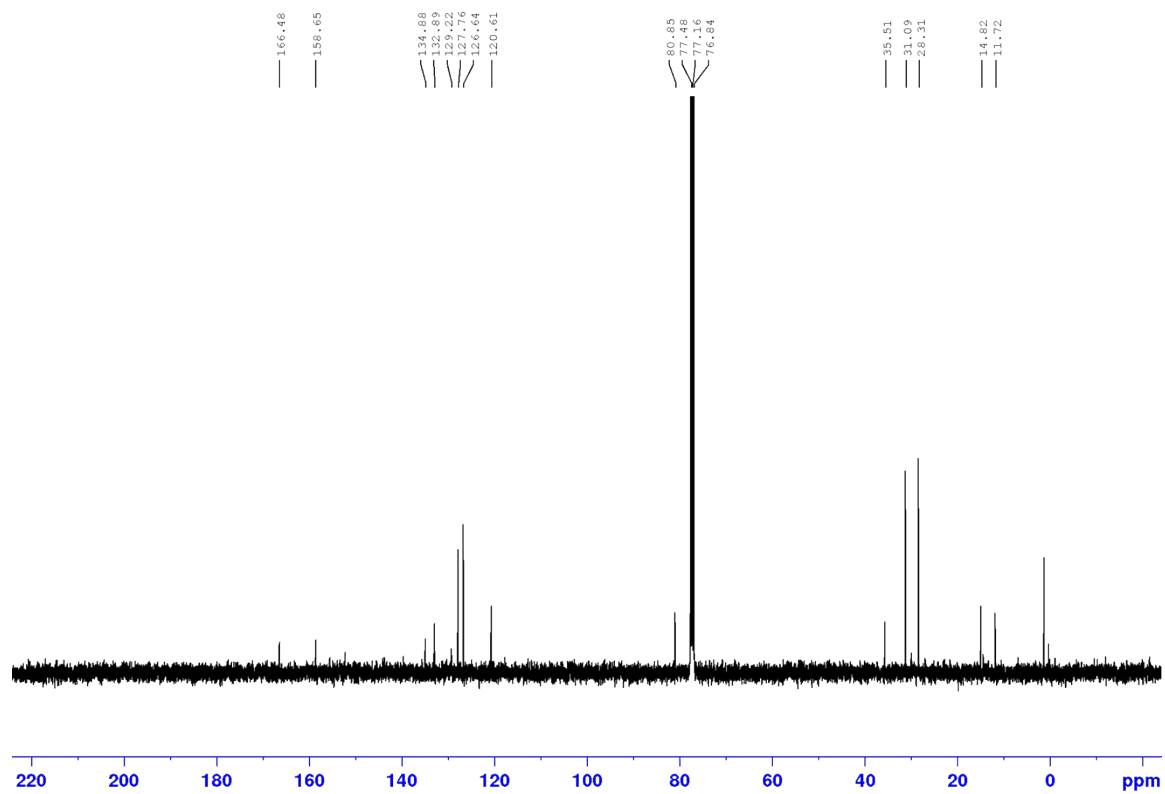

**HRMS of 31**

Elemental Composition Report

Single Mass Analysis

Tolerance = 50.0 PPM / DBE: min = -1.5, max = 50.0

Element prediction: Off

Number of isotope peaks used for i-FIT = 3

Monoisotopic Mass, Even Electron Ions

31 formula(e) evaluated with 1 results within limits (up to 3 closest results for each mass)

Elements Used:

C: 0-22 H: 0-100 N: 0-2 O: 0-4 S: 0-1

MA-206

QMI DIVISION, CSIR-IIIM JAMMU  
Xevo G2-XS QTOF YFC2015

06-Apr-2022  
12:16:28  
1: TOF MS ES+  
4.88e+007

060422\_05 7 (0.155)

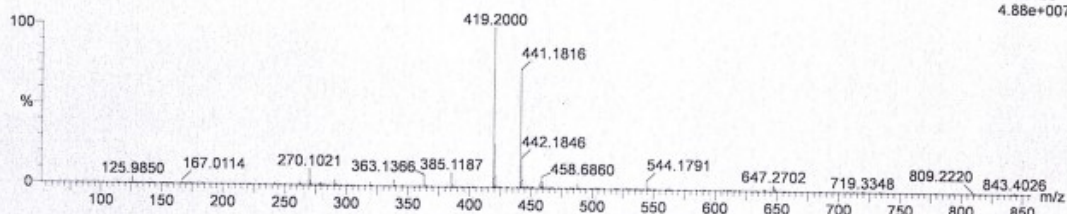

Minimum: -1.5  
Maximum: 2.0 50.0 50.0

| Mass     | Calc. Mass | mDa  | PPM  | DBE | i-FIT  | Norm | Conf(%) | Formula         |
|----------|------------|------|------|-----|--------|------|---------|-----------------|
| 419.2000 | 419.2005   | -0.5 | -1.2 | 8.5 | 1107.8 | n/a  | n/a     | C22 H31 N2 O4 S |

<sup>1</sup>H-NMR (400 MHz, DMSO-d<sub>6</sub>) of 3m

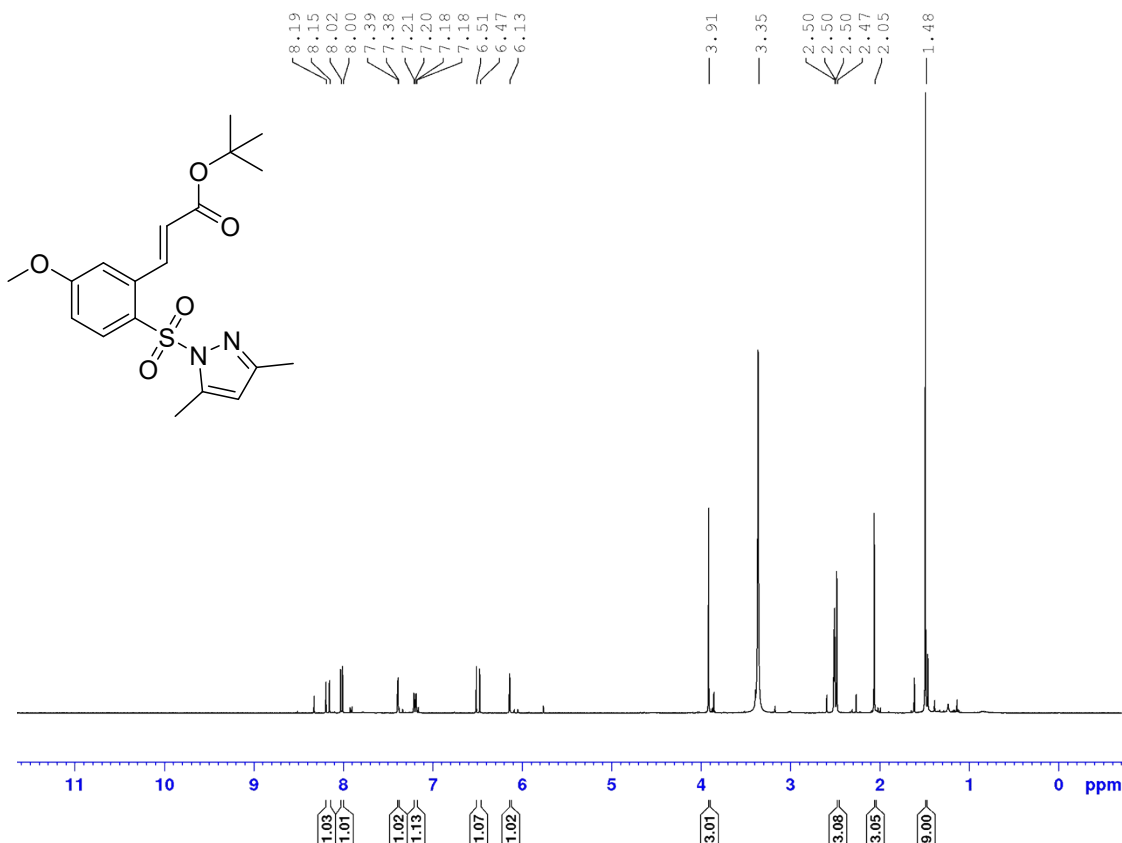

<sup>13</sup>C{<sup>1</sup>H}-NMR (101 MHz, DMSO-d<sub>6</sub>) of 3m

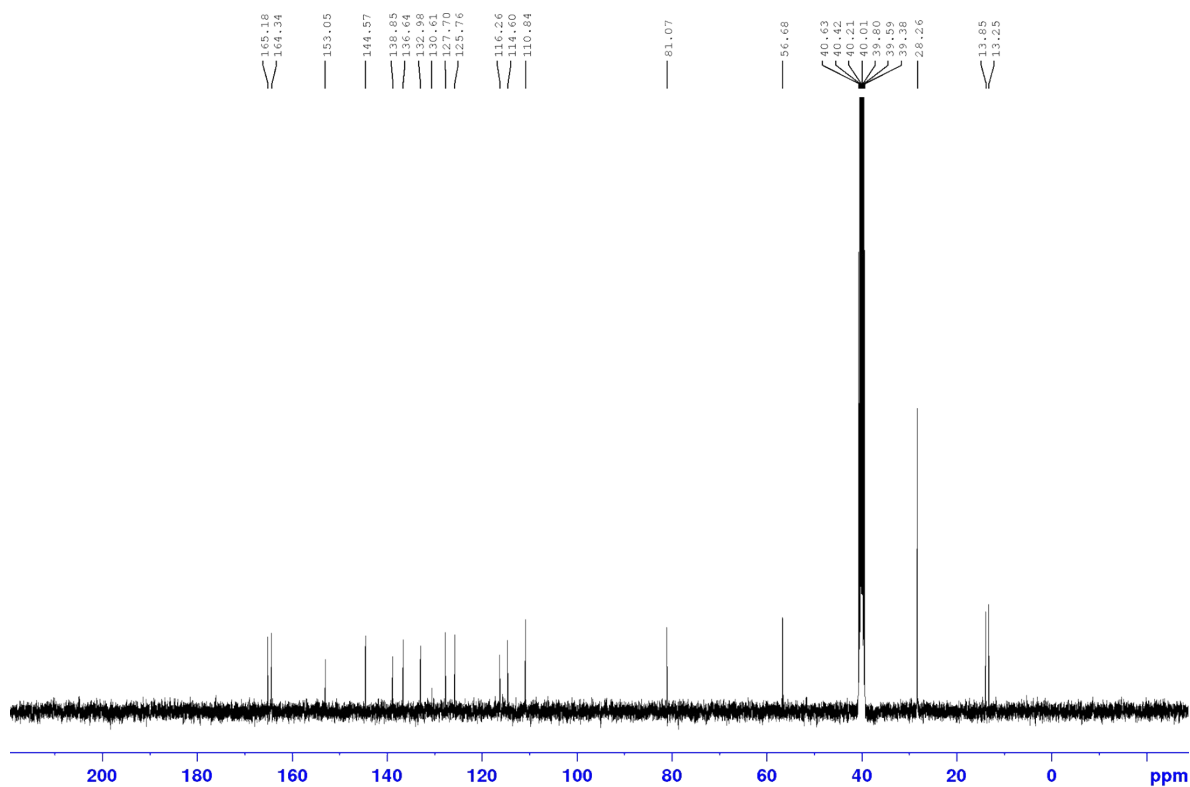

## HRMS of 3m

### Elemental Composition Report

Page 1

#### Single Mass Analysis

Tolerance = 5.0 PPM / DBE: min = -1.5, max = 50.0

Element prediction: Off

Number of isotope peaks used for i-FIT = 3

Monoisotopic Mass, Even Electron Ions

37 formula(e) evaluated with 1 results within limits (up to 3 closest results for each mass)

Elements Used:

C: 0-19 H: 0-100 N: 0-2 O: 0-5 S: 0-1

MA-172 S2

160222\_08 15 (0.310) Cm (15:16)

QMI DIVISION, CSIR-IIIM JAMMU  
Xevo G2-XS QTOF YFC2015

16-Feb-2022  
12:28:36  
1: TOF MS ES+  
1.52e+006

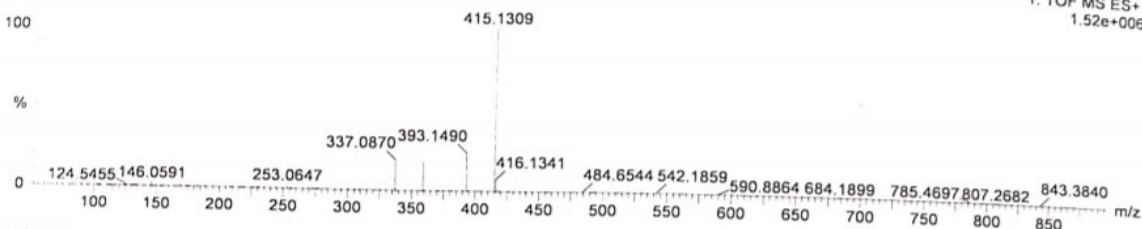

Minimum:

Maximum: 2.0 5.0 -1.5

| Mass     | Calc. Mass | mDa | PPM | DBE | i-FIT | Norm | Conf (%) | Formula         |
|----------|------------|-----|-----|-----|-------|------|----------|-----------------|
| 393.1490 | 393.1484   | 0.6 | 1.5 | 8.5 | 35.0  | n/a  | n/a      | C19 H25 N2 O5 S |

## <sup>1</sup>H-NMR (400 MHz, CDCl<sub>3</sub>) of 3n

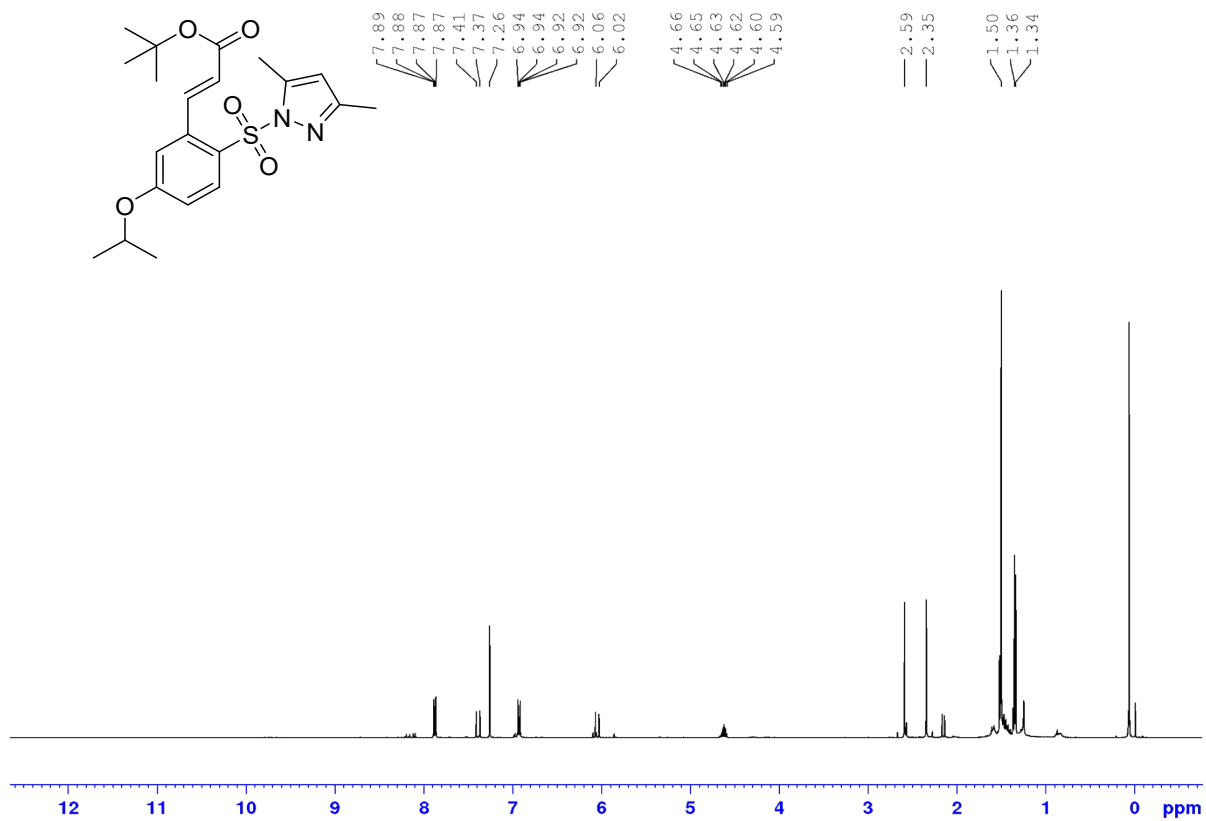

**<sup>13</sup>C{<sup>1</sup>H}-NMR (101 MHz, CDCl<sub>3</sub>) of 3n**

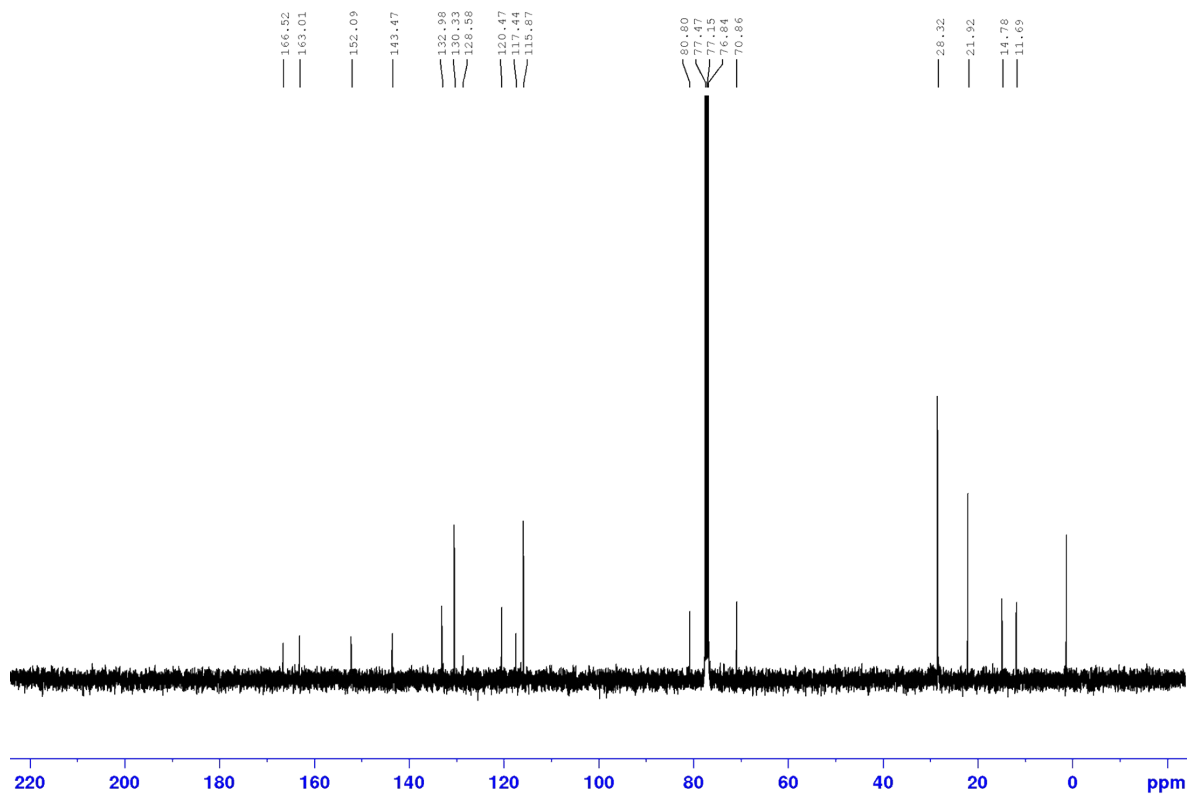

**HRMS of 3n**

## Elemental Composition Report

Page 1

### Single Mass Analysis

Tolerance = 50.0 PPM / DBE: min = -1.5, max = 50.0  
Element prediction: Off  
Number of isotope peaks used for i-FIT = 3

Monoisotopic Mass, Even Electron Ions

37 formula(e) evaluated with 1 results within limits (up to 3 closest results for each mass)

Elements Used:

C: 0-21 H: 0-100 N: 0-2 O: 0-5 S: 0-1

MA-232

230522\_11 9 (0.208) Cm (9)

QMI DIVISION, CSIR-IIIM JAMMU  
Xevo G2-XS QTOF YFC2015

23-May-2022  
12:33:14  
1: TOF MS ES+  
1.77e+006

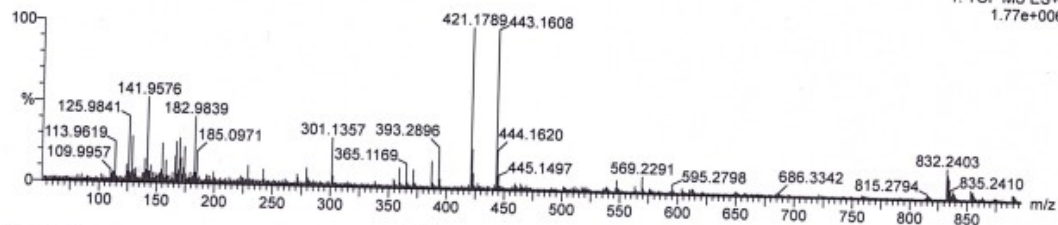

Minimum: -1.5  
Maximum: 50.0

| Mass     | Calc. Mass | mDa  | PPM  | DBE | i-FIT | Norm | Conf (%) | Formula         |
|----------|------------|------|------|-----|-------|------|----------|-----------------|
| 421.1789 | 421.1797   | -0.8 | -1.9 | 8.5 | 49.7  | n/a  | n/a      | C21 H29 N2 O5 S |

### <sup>1</sup>H-NMR (400 MHz, CDCl<sub>3</sub>) of 3o

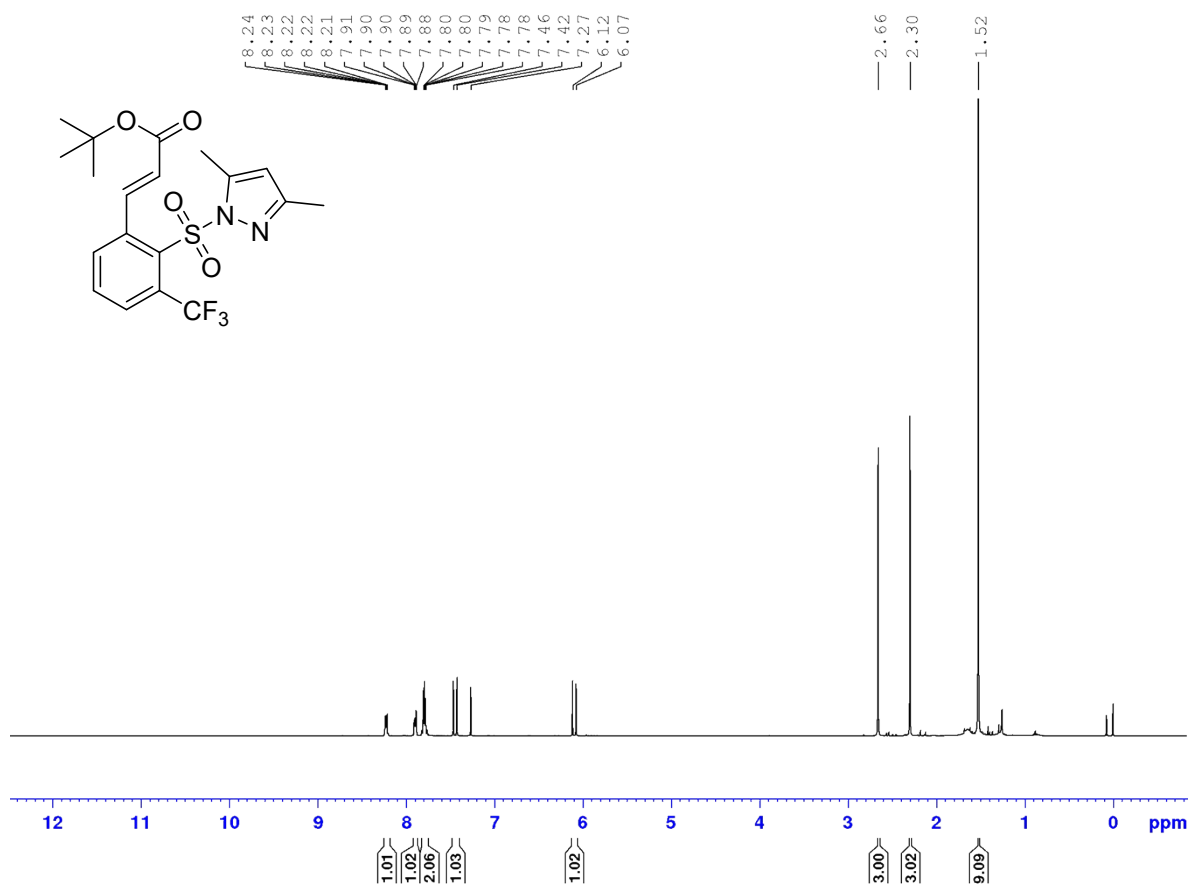

### <sup>13</sup>C{<sup>1</sup>H}-NMR (101 MHz, CDCl<sub>3</sub>) of 3o

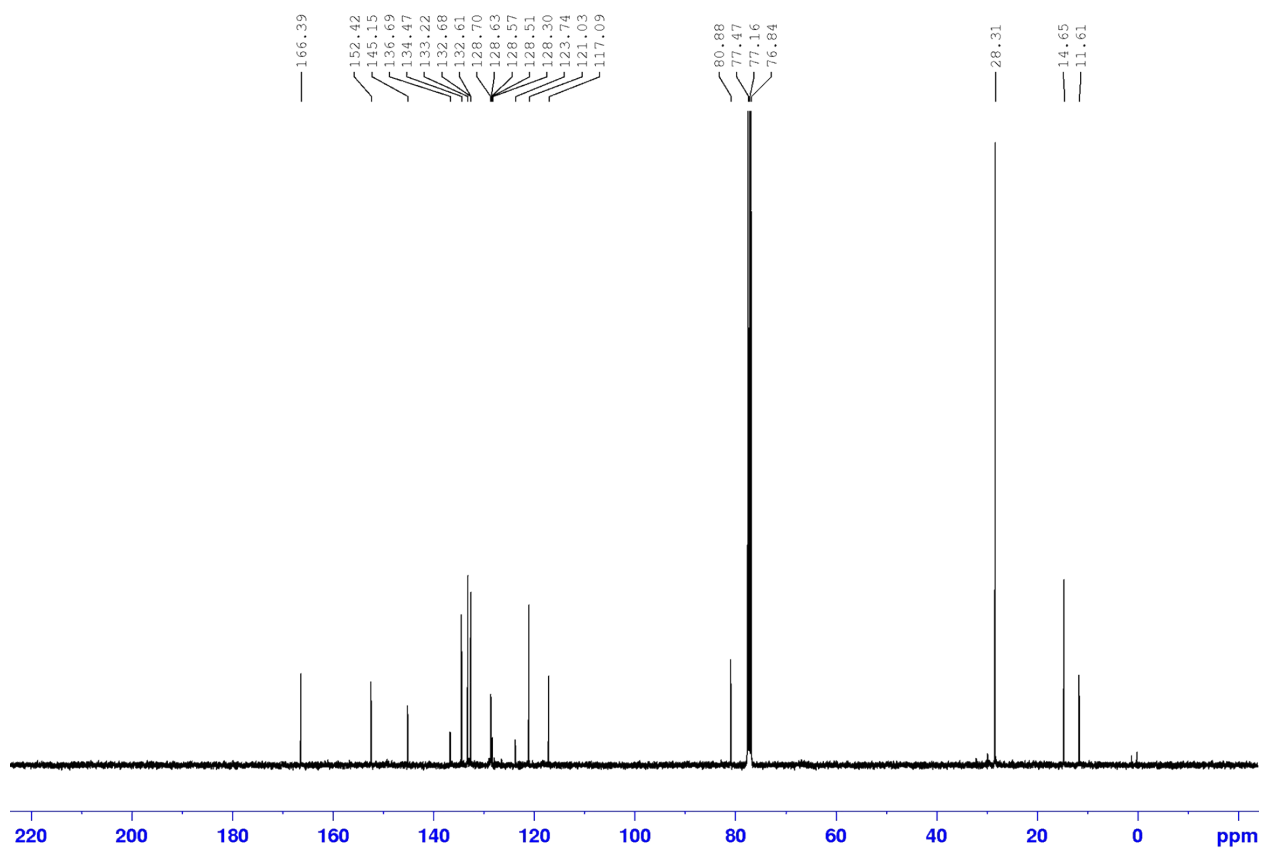

**<sup>19</sup>F-NMR (377 MHz, CDCl<sub>3</sub>) of 30**

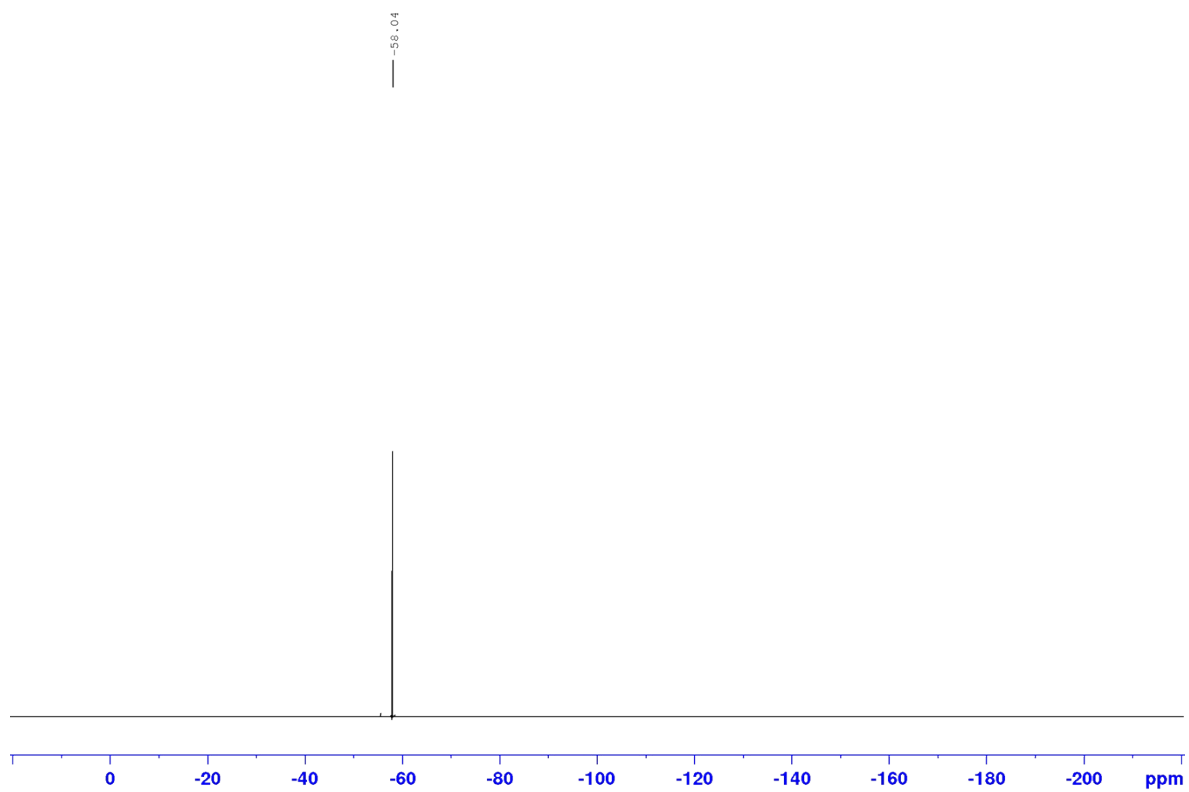

# HRMS of 3o

## Elemental Composition Report

### Single Mass Analysis

Tolerance = 50.0 PPM / DBE: min = -1.5, max = 50.0  
Element prediction: Off  
Number of isotope peaks used for i-FIT = 3

Monoisotopic Mass, Even Electron Ions

121 formula(e) evaluated with 1 results within limits (up to 3 closest results for each mass)

Elements Used:

C: 0-19 H: 0-100 N: 0-2 O: 0-4 F: 0-3 S: 0-1

MA-244

QMI DIVISION, CSIR-IIIM JAMMU  
Xevo G2-XS QTOF YFC2015

050822\_04 10 (0.225)

05-Aug-2022  
14:07:15  
1: TOF MS ES+  
1.36e+007

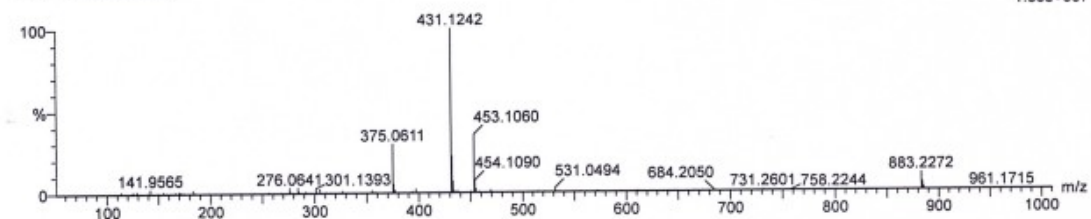

Minimum: -1.5  
Maximum: 2.0 50.0 50.0

| Mass     | Calc. Mass | mDa  | PPM  | DBE | i-FIT | Norm | Conf (%) | Formula            |
|----------|------------|------|------|-----|-------|------|----------|--------------------|
| 431.1242 | 431.1252   | -1.0 | -2.3 | 8.5 | 777.0 | n/a  | n/a      | C19 H22 N2 O4 F3 S |

## <sup>1</sup>H-NMR (400 MHz, CDCl<sub>3</sub>) of 3p

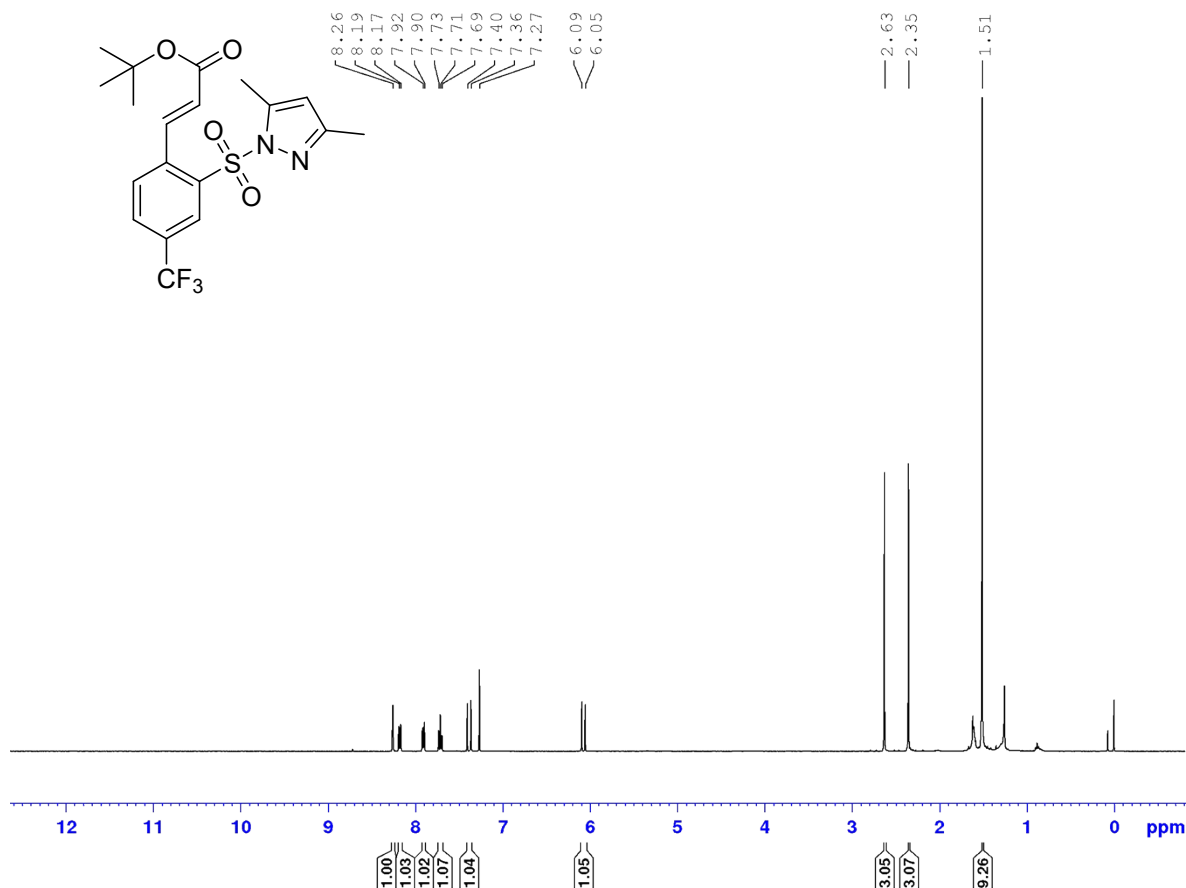

**$^{13}\text{C}\{^1\text{H}\}$ -NMR (101 MHz,  $\text{CDCl}_3$ ) of 3p**

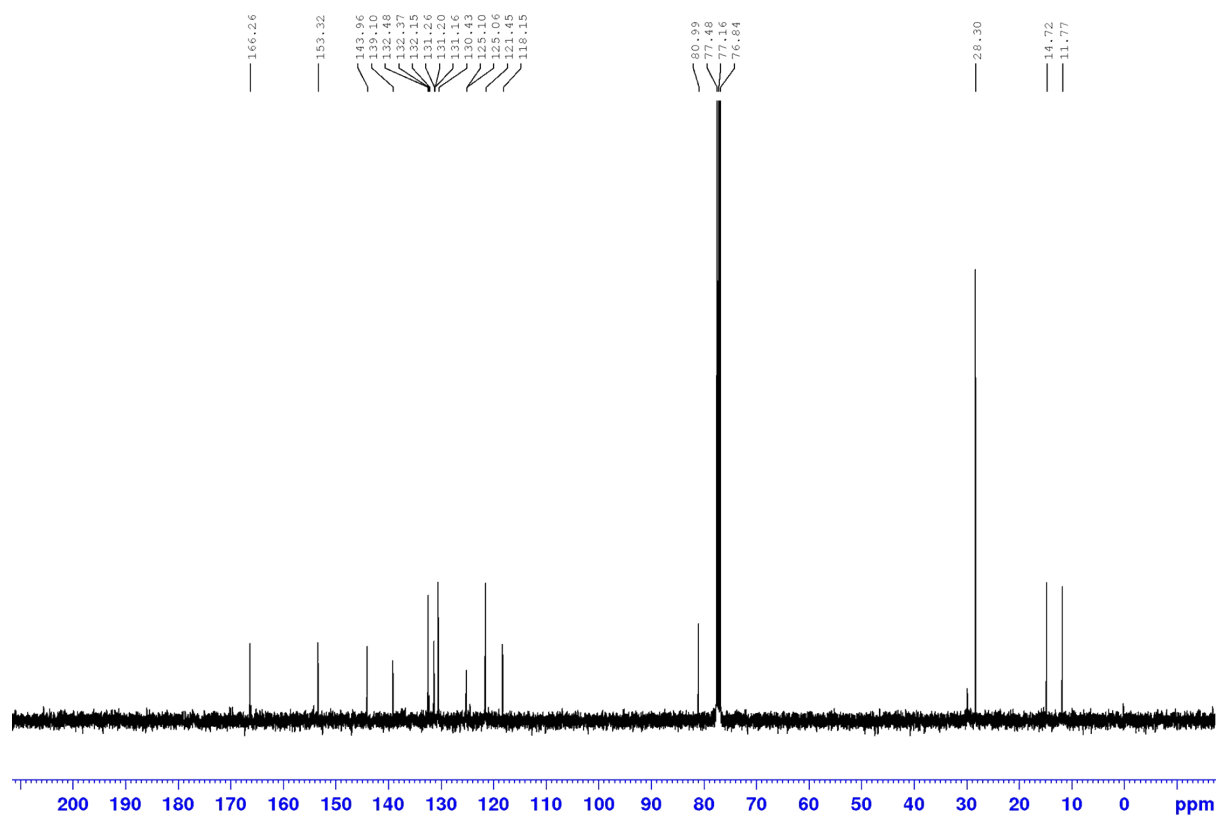

**$^{19}\text{F}$ -NMR (377 MHz,  $\text{CDCl}_3$ ) of 3p**

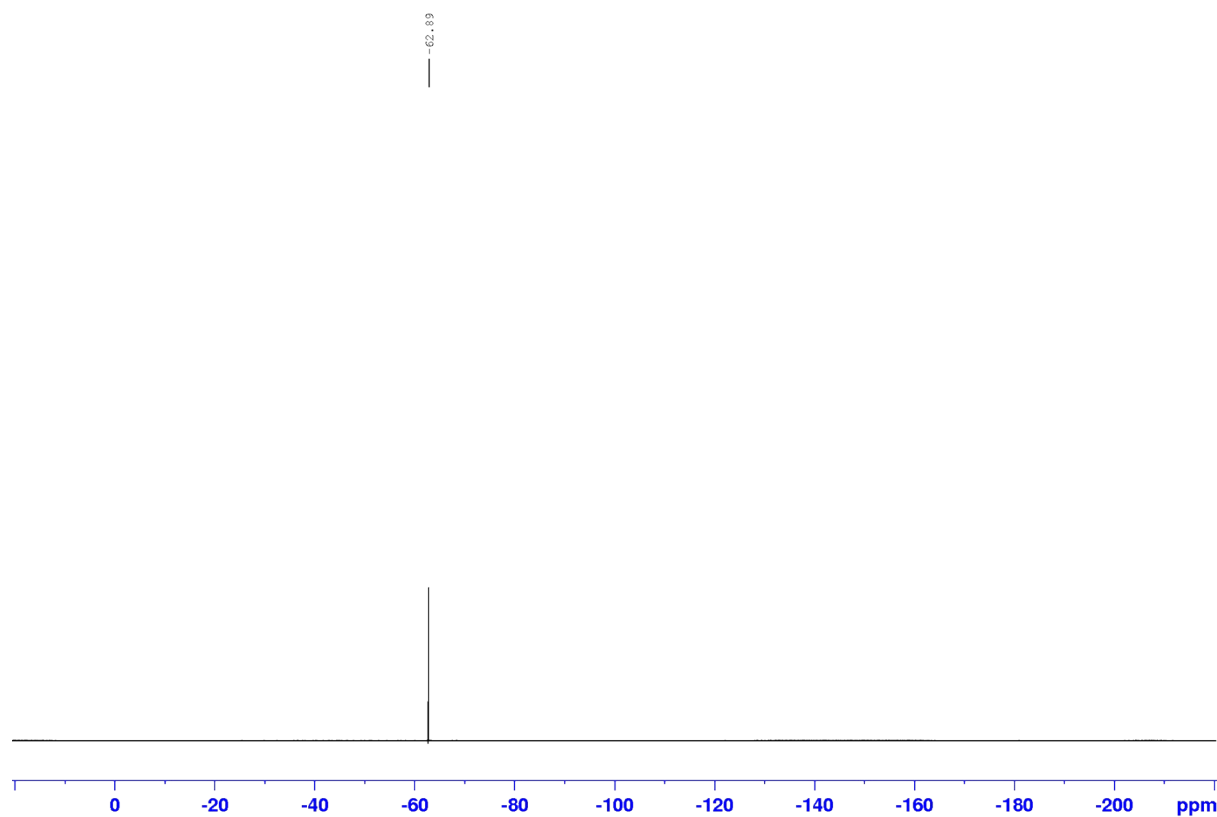



# HRMS of 3p

## Elemental Composition Report

Page 1

### Single Mass Analysis

Tolerance = 50.0 PPM / DBE: min = -1.5, max = 50.0

Element prediction: Off

Number of isotope peaks used for i-FIT = 3

Monoisotopic Mass, Even Electron Ions

121 formula(e) evaluated with 1 results within limits (up to 3 closest results for each mass)

Elements Used:

C: 0-19 H: 0-100 N: 0-2 O: 0-4 S: 0-1 F: 0-3

MA-241

QMI DIVISION, CSIR-IIIM JAMMU  
Xevo G2-XS QTOF YFC2015

17-Jun-2022

13:32:26

1: TOF MS ES+  
1.68e+007

170622\_11 8 (0.172)

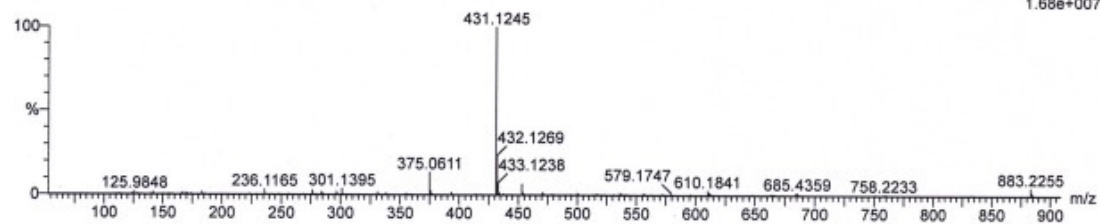

Minimum: -1.5  
Maximum: 2.0 50.0 50.0

| Mass     | Calc. Mass | mDa  | PPM  | DBE | i-FIT | Norm | Conf(%) | Formula            |
|----------|------------|------|------|-----|-------|------|---------|--------------------|
| 431.1245 | 431.1252   | -0.7 | -1.6 | 8.5 | 863.7 | n/a  | n/a     | C19 H22 N2 O4 S F3 |

## <sup>1</sup>H-NMR (400 MHz, CDCl<sub>3</sub>) of 3q

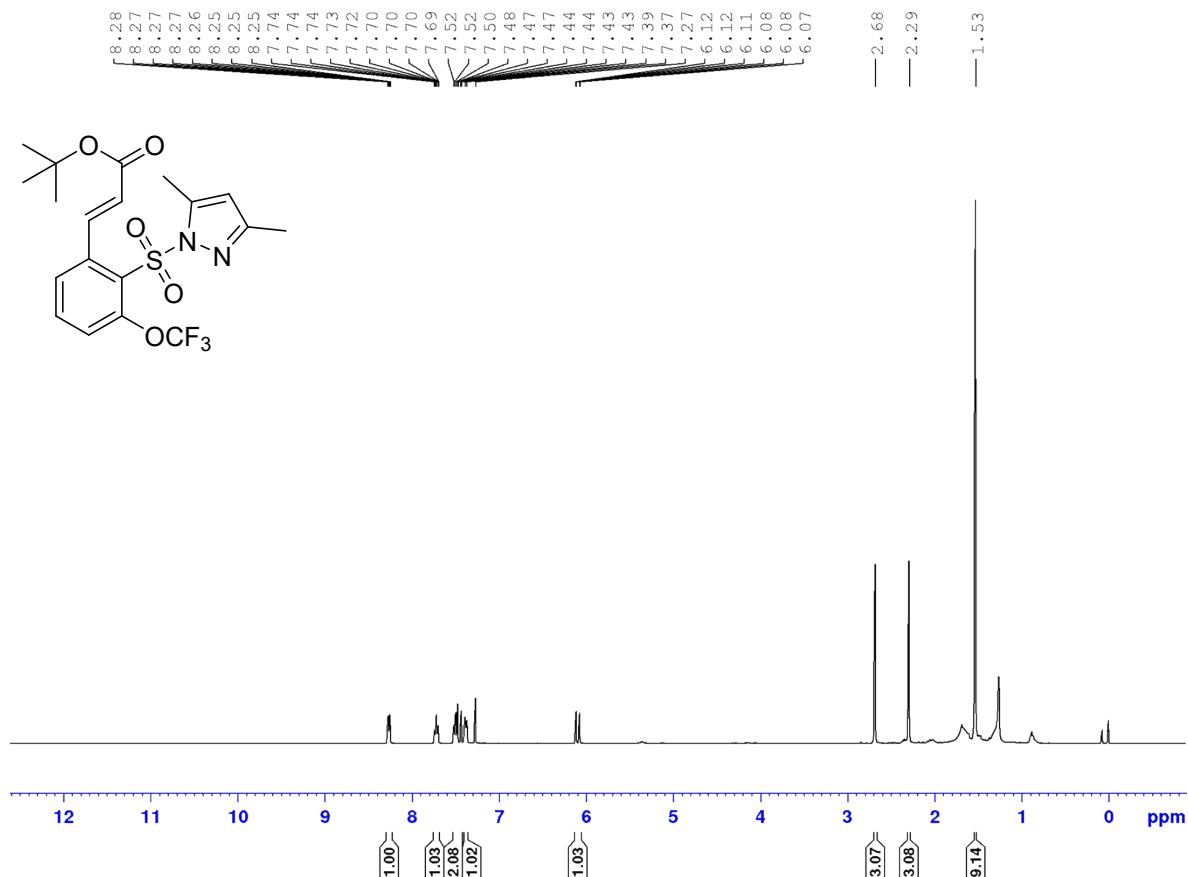

**$^{13}\text{C}\{^1\text{H}\}$ -NMR (101 MHz,  $\text{CDCl}_3$ ) of 3q**

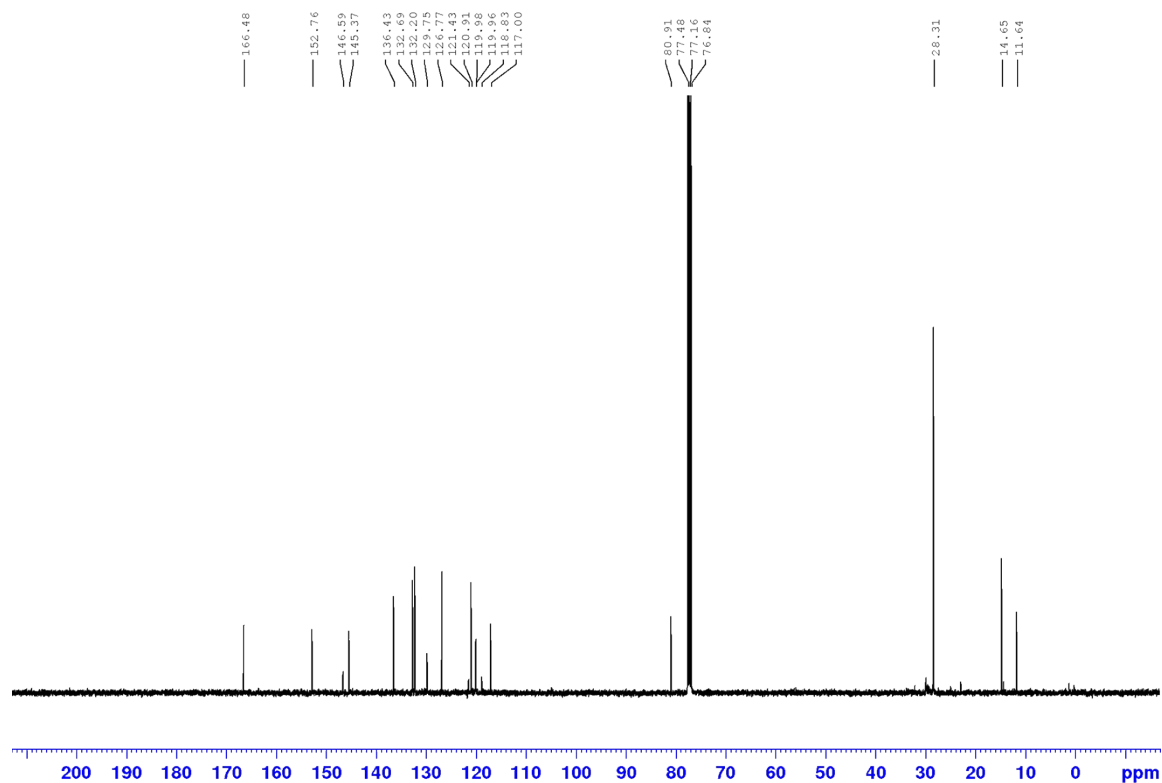

**$^{19}\text{F}$ -NMR (377 MHz,  $\text{CDCl}_3$ ) of 3q**

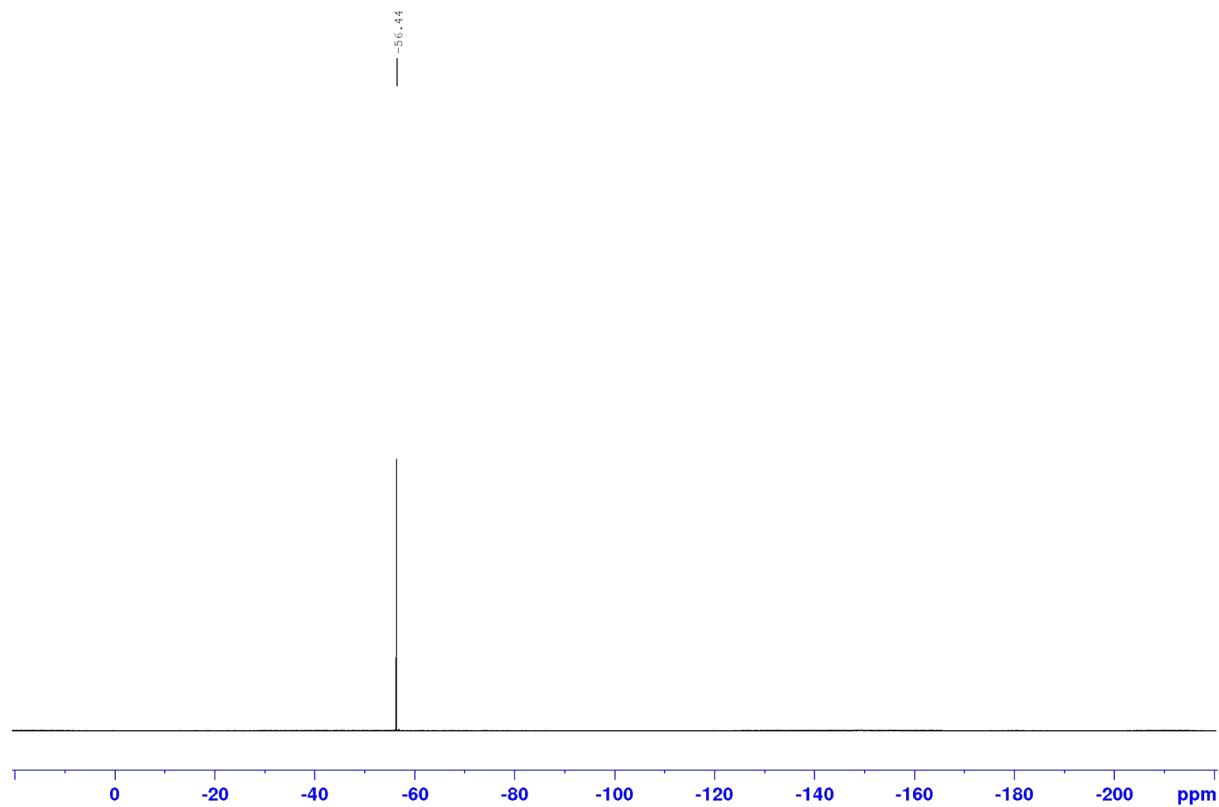

# HRMS of 3q

## Elemental Composition Report

Page 1

### Single Mass Analysis

Tolerance = 50.0 PPM / DBE: min = -1.5, max = 50.0

Element prediction: Off

Number of isotope peaks used for i-FIT = 3

Monoisotopic Mass, Even Electron Ions

145 formula(e) evaluated with 1 results within limits (up to 3 closest results for each mass)

Elements Used:

C: 0-19 H: 0-100 N: 0-2 O: 0-5 F: 0-3 S: 0-1

MA-248

QMI DIVISION, CSIR-IIIM JAMMU  
Xevo G2-XS QTOF YFC2015

05-Aug-2022

14:04:33

1: TOF MS ES+

1.62e+007

050822\_03 9 (0.209)

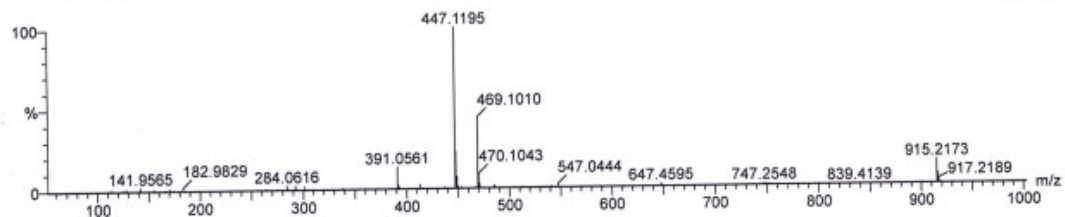

Minimum: -1.5  
Maximum: 2.0 50.0 50.0

| Mass     | Calc. Mass | mDa  | PPM  | DBE | i-FIT | Norm | Conf(%) | Formula            |
|----------|------------|------|------|-----|-------|------|---------|--------------------|
| 447.1195 | 447.1202   | -0.7 | -1.6 | 8.5 | 768.5 | n/a  | n/a     | C19 H22 N2 O5 F3 S |

## <sup>1</sup>H-NMR (400 MHz, CDCl<sub>3</sub>) of 3r

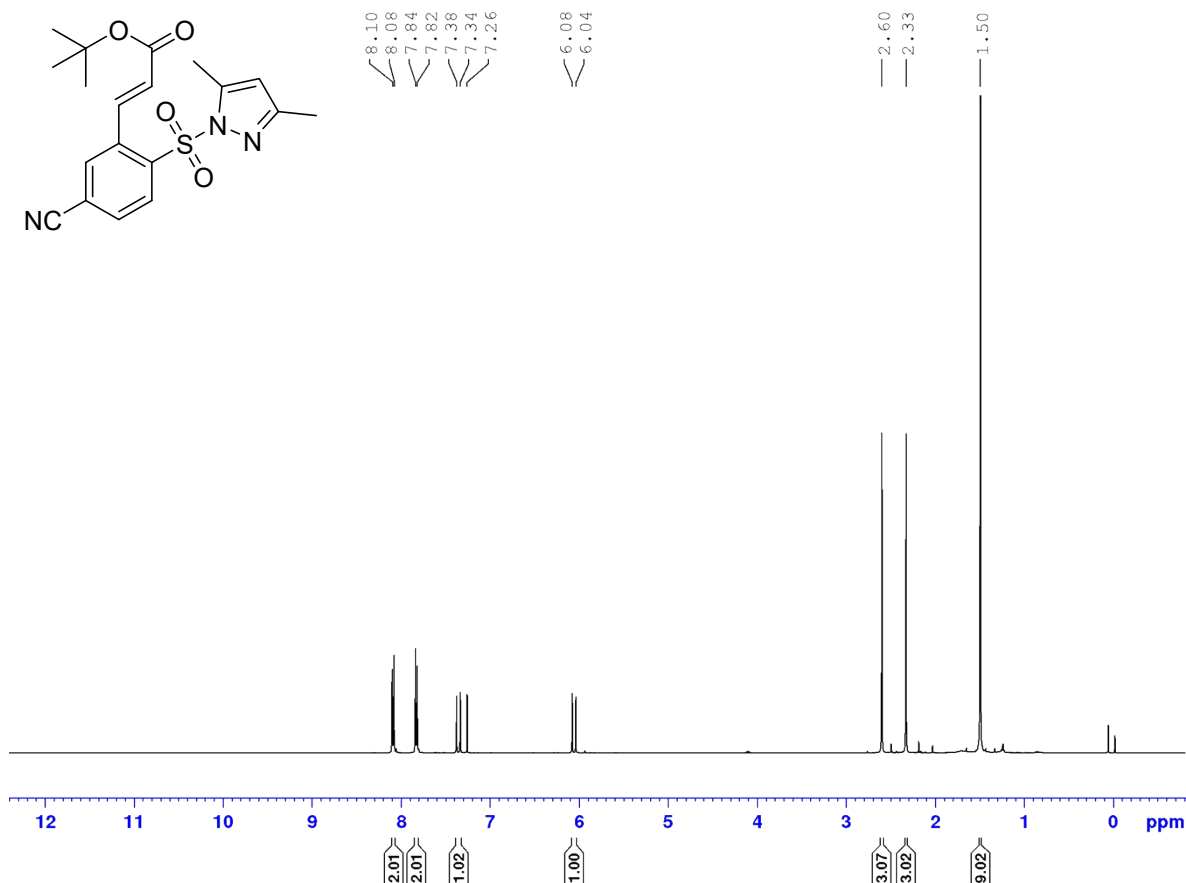

### $^{13}\text{C}\{^1\text{H}\}$ -NMR (101 MHz, $\text{CDCl}_3$ ) of 3r

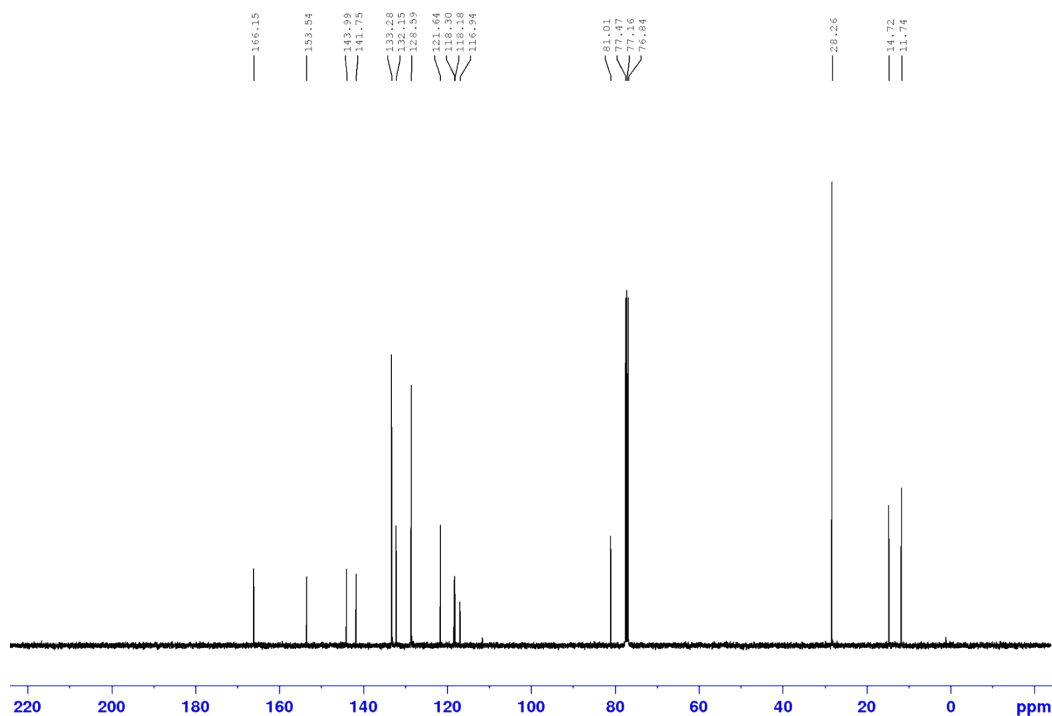

### HRMS of 3r

#### Elemental Composition Report

Page 1

#### Single Mass Analysis

Tolerance = 50.0 PPM / DBE: min = -1.5, max = 50.0

Element prediction: Off

Number of isotope peaks used for i-FIT = 3

Monoisotopic Mass, Even Electron Ions

44 formula(e) evaluated with 1 results within limits (up to 3 closest results for each mass)

Elements Used:

C: 0-19 H: 0-100 N: 0-3 O: 0-4 S: 0-1

MA-238

QMI DIVISION, CSIR-IIIM JAMMU  
Xevo G2-XS QTOF YFC2015

01-Jun-2022

13:39:46

1: TOF MS ES+  
2.58e+006

010622\_12 16 (0.327) Cm (16)

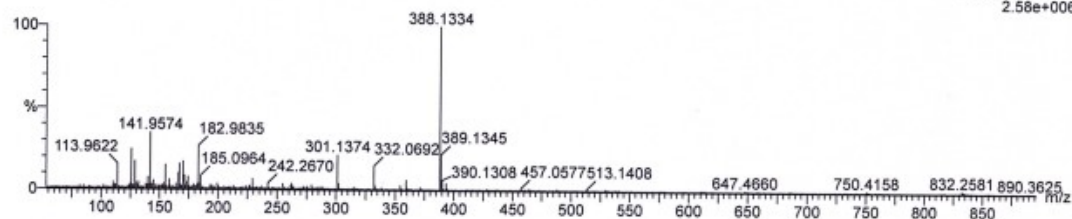

Minimum: -1.5  
Maximum: 2.0 50.0 50.0

| Mass     | Calc. Mass | mDa | PPM | DBE  | i-FIT | Norm | Conf (%) | Formula         |
|----------|------------|-----|-----|------|-------|------|----------|-----------------|
| 388.1334 | 388.1331   | 0.3 | 0.8 | 10.5 | 31.3  | n/a  | n/a      | C19 H22 N3 O4 S |

### $^1\text{H}$ -NMR (400 MHz, $\text{CDCl}_3$ ) of 3s

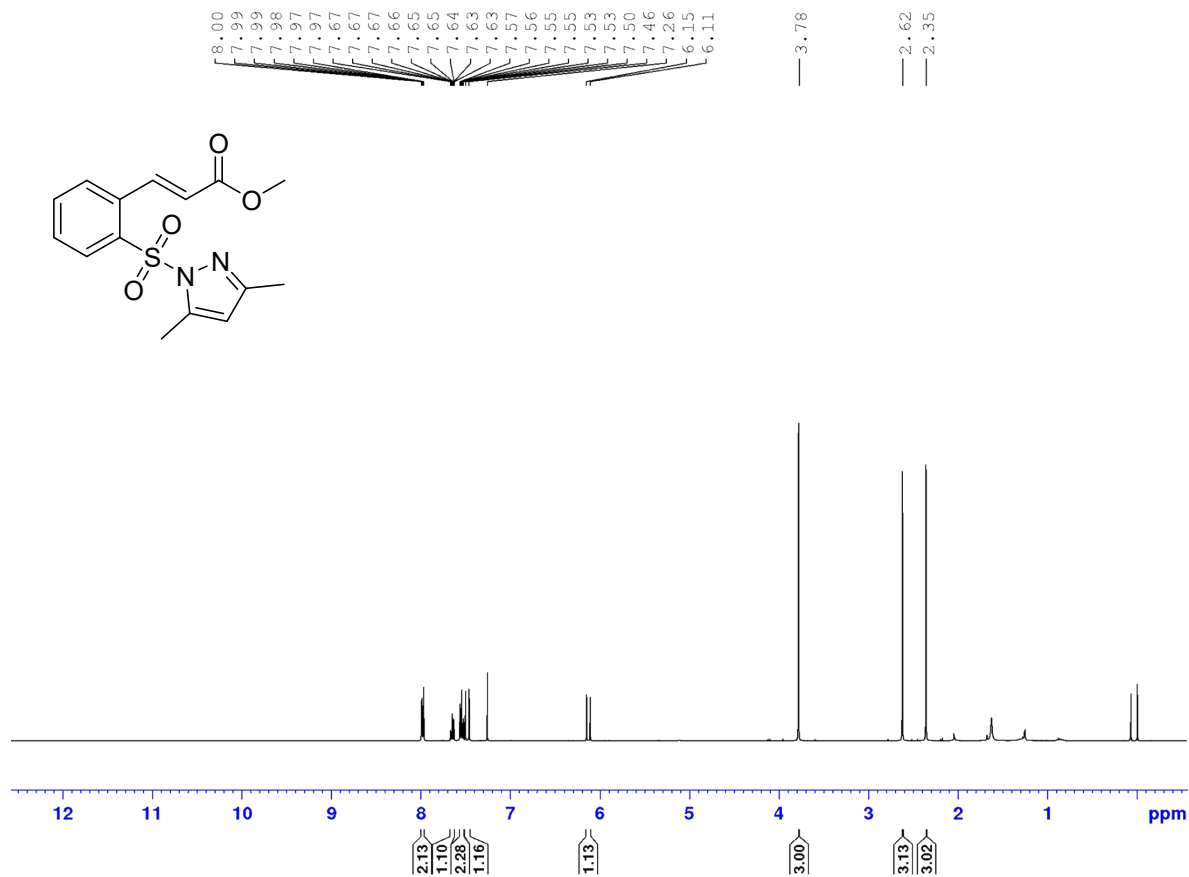

**<sup>13</sup>C{<sup>1</sup>H}-NMR (101 MHz, CDCl<sub>3</sub>) of 3s**

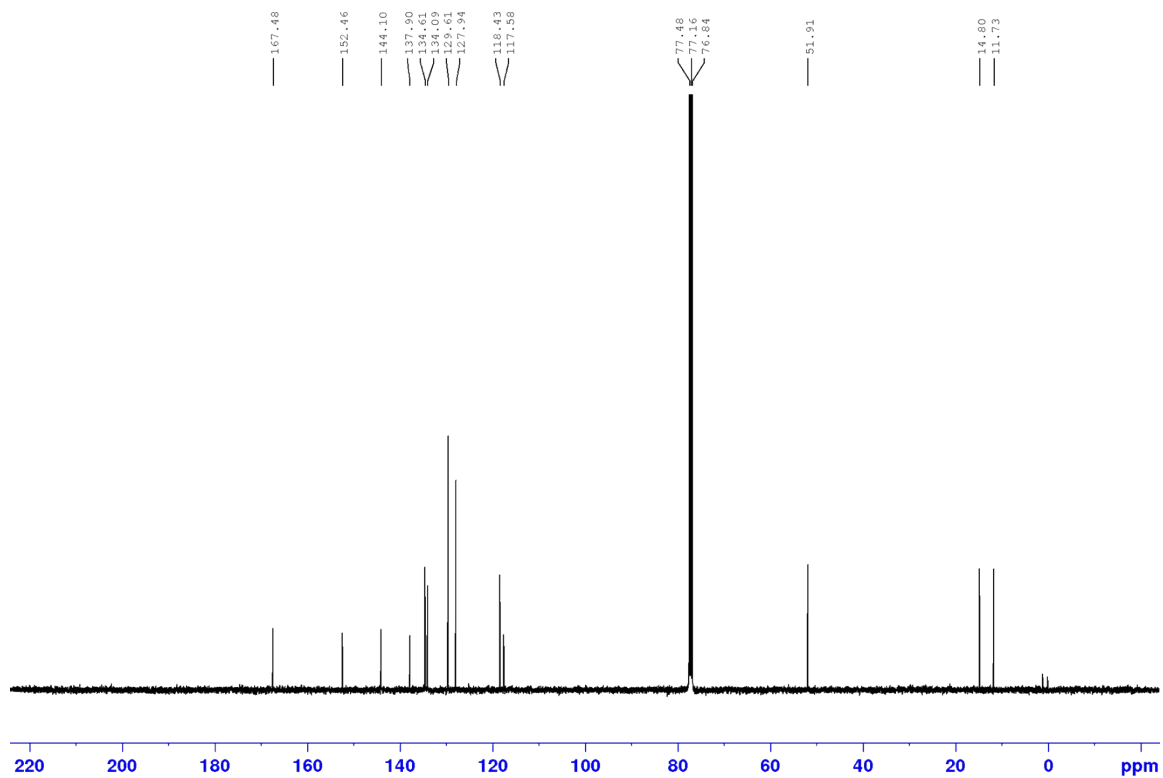

**HRMS of 3s**

## Elemental Composition Report

Page 1

### Single Mass Analysis

Tolerance = 50.0 PPM / DBE: min = -1.5, max = 50.0

Element prediction: Off

Number of isotope peaks used for i-FIT = 3

Monoisotopic Mass, Even Electron Ions

31 formula(e) evaluated with 1 results within limits (up to 3 closest results for each mass)

Elements Used:

C: 0-15 H: 0-100 N: 0-2 O: 0-4 S: 0-1

MA-252

QMI DIVISION, CSIR-IIIM JAMMU  
Xevo G2-XS QTOF YFC2015

28-Sep-2022

13:03:07

1: TOF MS ES+

1.30e+007

280922\_11 9 (0.209)

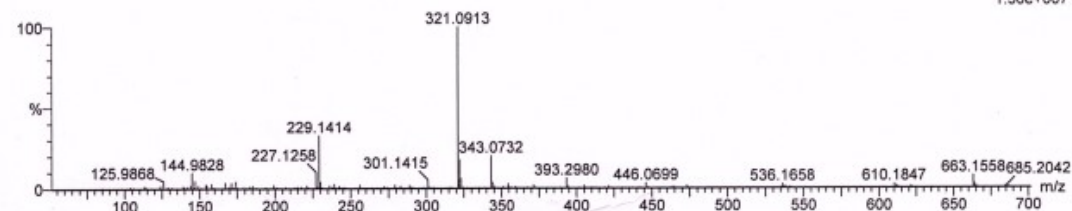

Minimum: -1.5  
Maximum: 2.0 50.0 50.0

| Mass     | Calc. Mass | mDa | PPM | DBE | i-FIT  | Norm | Conf(%) | Formula         |
|----------|------------|-----|-----|-----|--------|------|---------|-----------------|
| 321.0913 | 321.0909   | 0.4 | 1.2 | 8.5 | 1293.8 | n/a  | n/a     | C15 H17 N2 O4 S |

## <sup>1</sup>H-NMR (400 MHz, CDCl<sub>3</sub>) of 3t

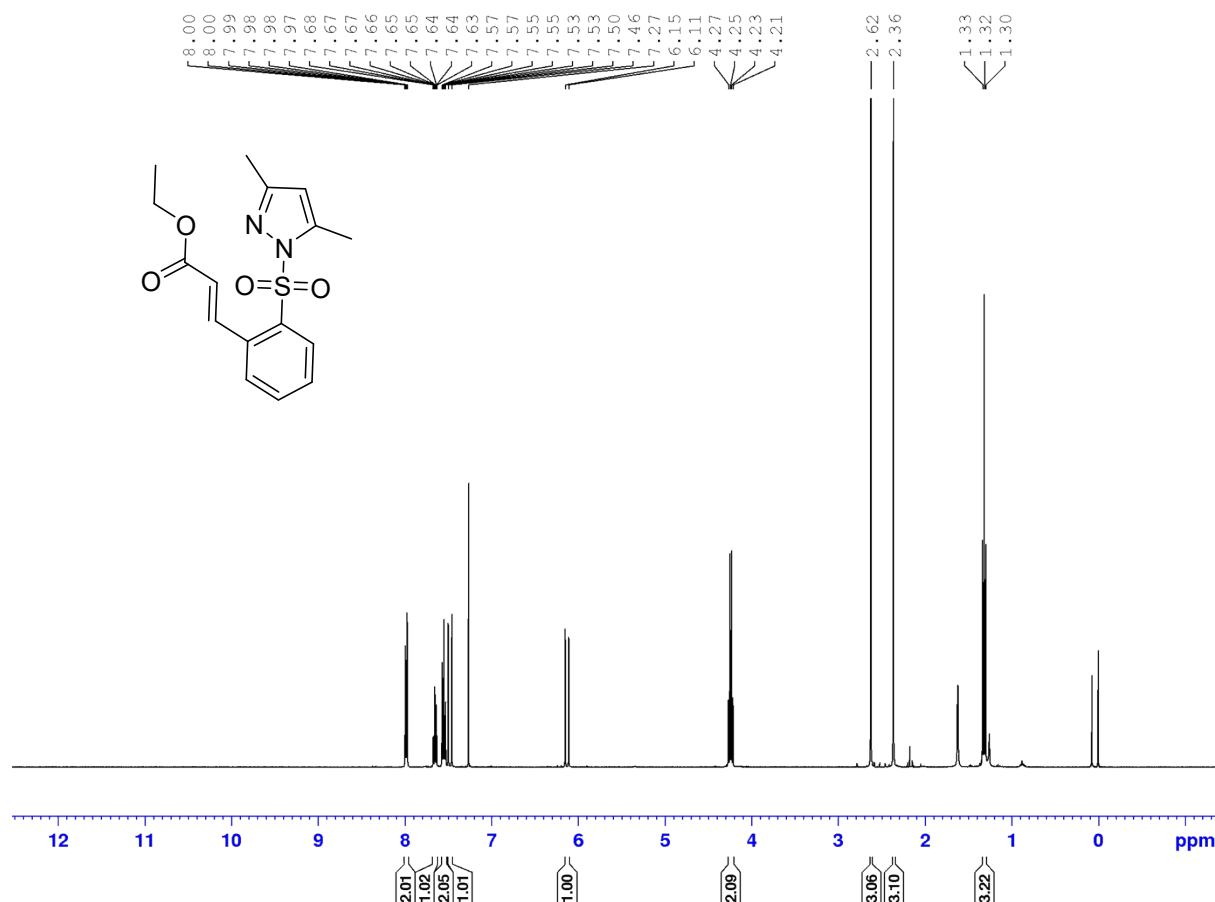

## <sup>13</sup>C{<sup>1</sup>H}-NMR (101 MHz, CDCl<sub>3</sub>) of 3t

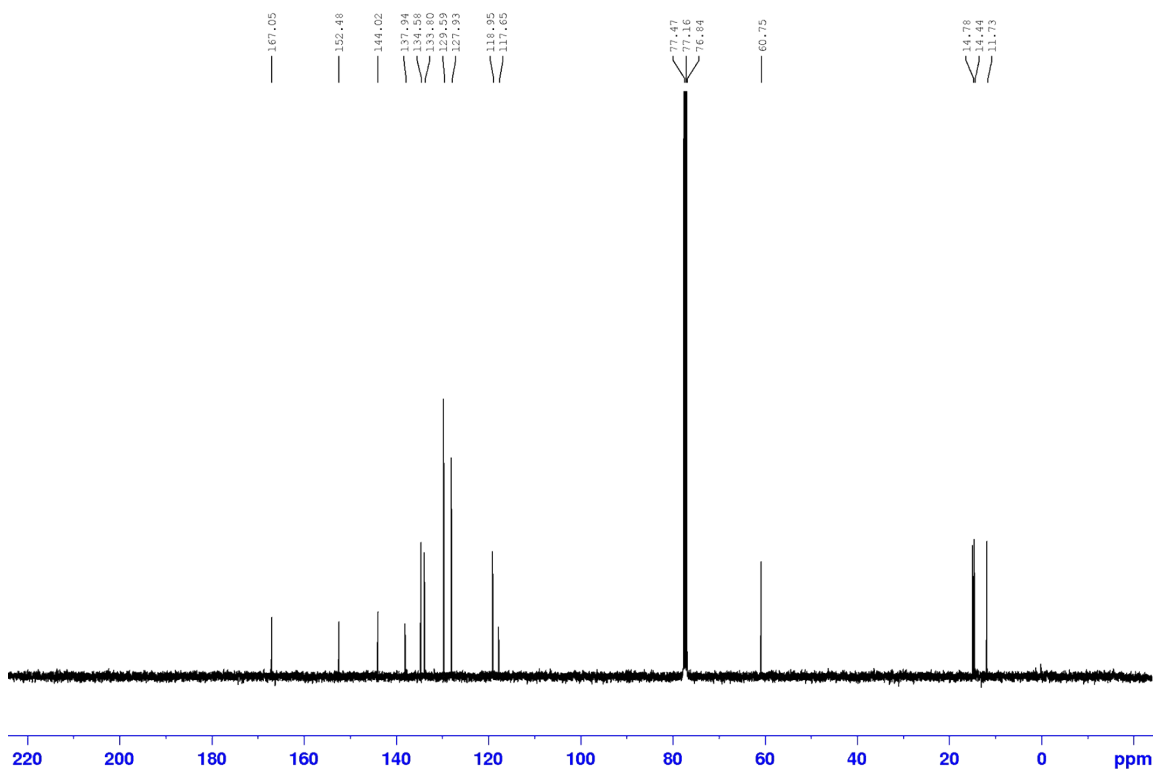

## HRMS of 3t

### Elemental Composition Report

Page 1

#### Single Mass Analysis

Tolerance = 50.0 PPM / DBE: min = -1.5, max = 50.0

Element prediction: Off

Number of isotope peaks used for i-FIT = 3

Monoisotopic Mass, Even Electron Ions

31 formula(e) evaluated with 1 results within limits (up to 3 closest results for each mass)

Elements Used:

C: 0-16 H: 0-100 N: 0-2 O: 0-4 S: 0-1

MA-EA

QMI DIVISION, CSIR-IIIM JAMMU  
Xevo G2-XS QTOF YFC2015

22-Feb-2023

11:17:05

1: TOF MS ES+

1.36e+007

220239 8 (0.172)

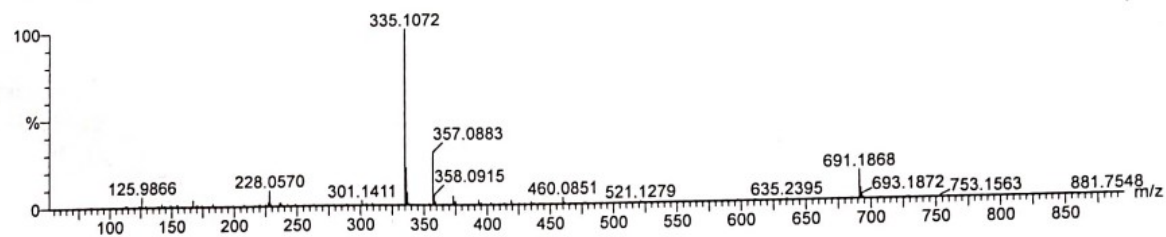

Minimum: -1.5  
Maximum: 2.0 50.0 50.0

| Mass     | Calc. Mass | mDa | PPM | DBE | i-FIT  | Norm | Conf (%) | Formula         |
|----------|------------|-----|-----|-----|--------|------|----------|-----------------|
| 335.1072 | 335.1066   | 0.6 | 1.8 | 8.5 | 1115.3 | n/a  | n/a      | C16 H19 N2 O4 S |

## <sup>1</sup>H-NMR (400 MHz, CDCl<sub>3</sub>) of 3u

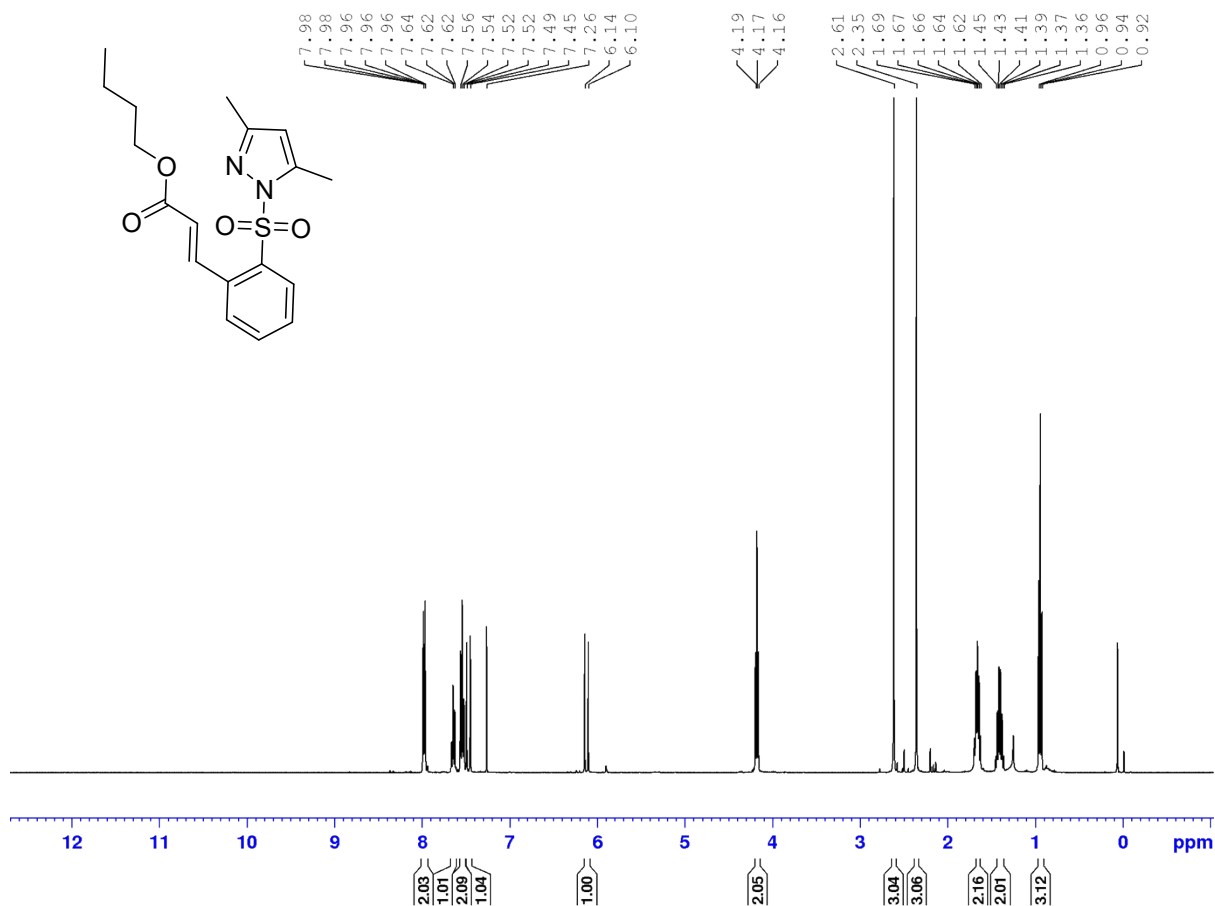

**<sup>13</sup>C{<sup>1</sup>H}-NMR (101 MHz, CDCl<sub>3</sub>) of 3u**

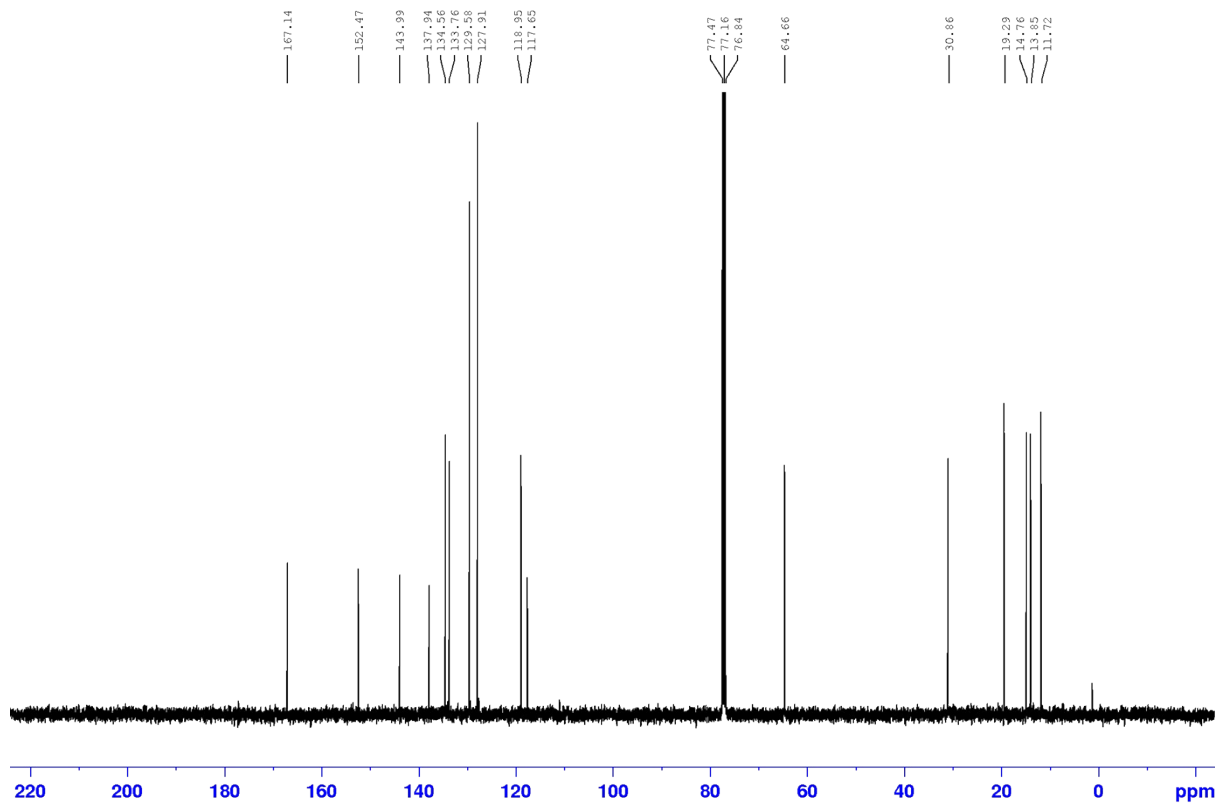

**HRMS of 3u**



## Elemental Composition Report

Page 1

### Single Mass Analysis

Tolerance = 100.0 PPM / DBE: min = -1.5, max = 50.0

Element prediction: Off

Number of isotope peaks used for i-FIT = 3

Monoisotopic Mass, Even Electron Ions

31 formula(e) evaluated with 1 results within limits (up to 3 closest results for each mass)

Elements Used:

C: 0-18 H: 0-100 N: 0-2 O: 0-4 S: 0-1

MA-bu

QMI DIVISION, CSIR-IIIM JAMMU  
Xevo G2-XS QTOF YFC2015

23-Feb-2023

12:20:52

1: TOF MS ES+

1.42e+007

230223\_25 31 (0.620)

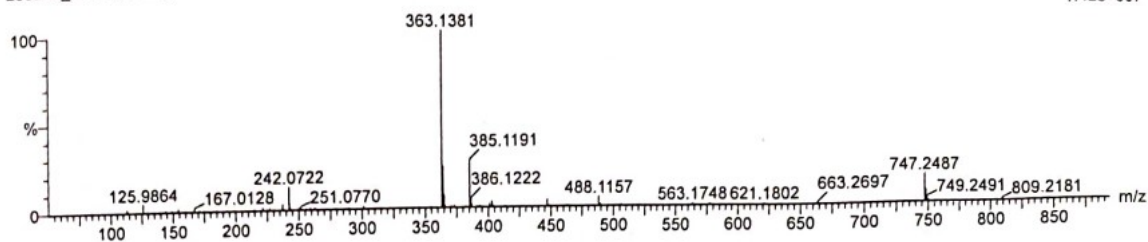

Minimum: -1.5  
Maximum: 2.0 100.0 50.0

| Mass     | Calc. Mass | mDa | PPM | DBE | i-FIT | Norm | Conf (%) | Formula         |
|----------|------------|-----|-----|-----|-------|------|----------|-----------------|
| 363.1381 | 363.1379   | 0.2 | 0.6 | 8.5 | 997.5 | n/a  | n/a      | C18 H23 N2 O4 S |

### <sup>1</sup>H-NMR (400 MHz, CDCl<sub>3</sub>) of 3aa

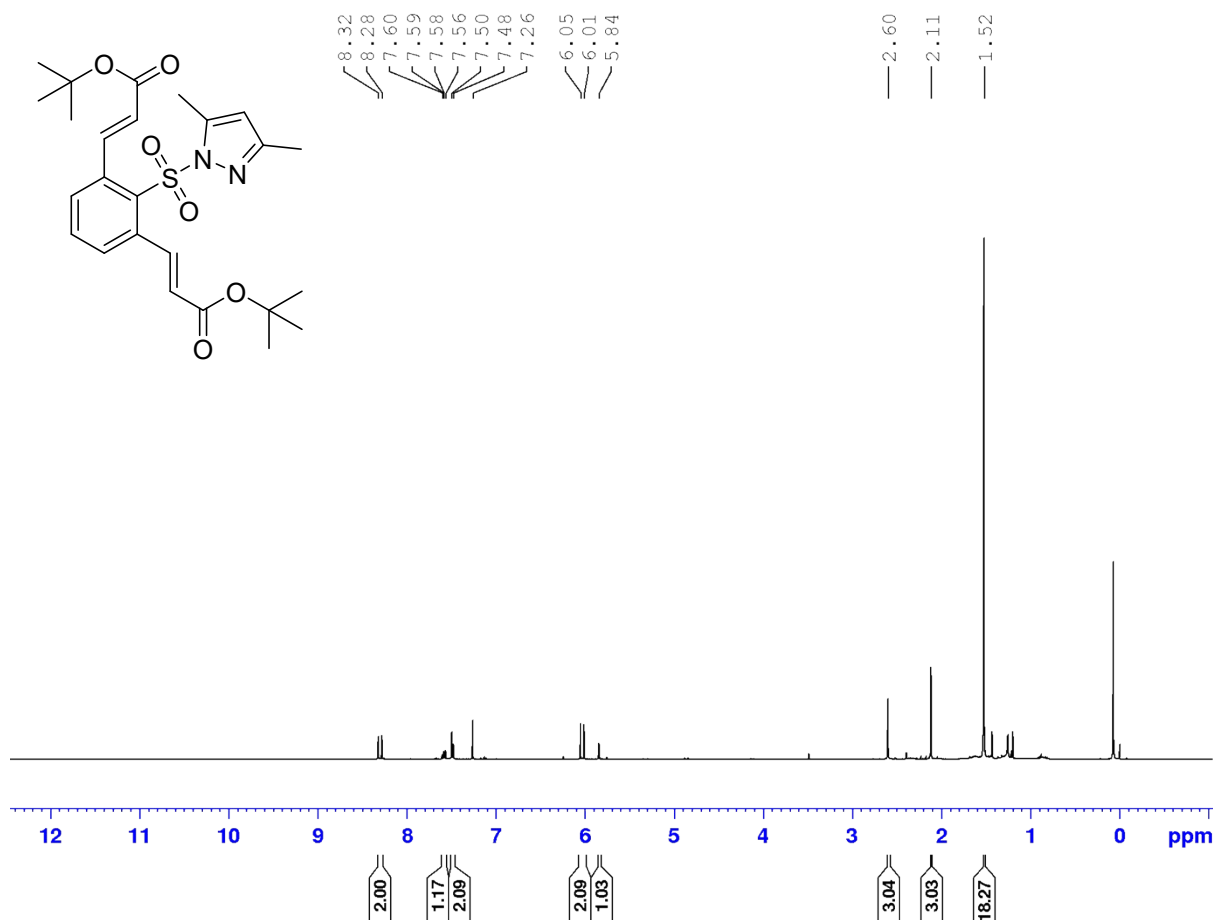

### <sup>13</sup>C{<sup>1</sup>H}-NMR (101 MHz, CDCl<sub>3</sub>) of 3aa

S-57

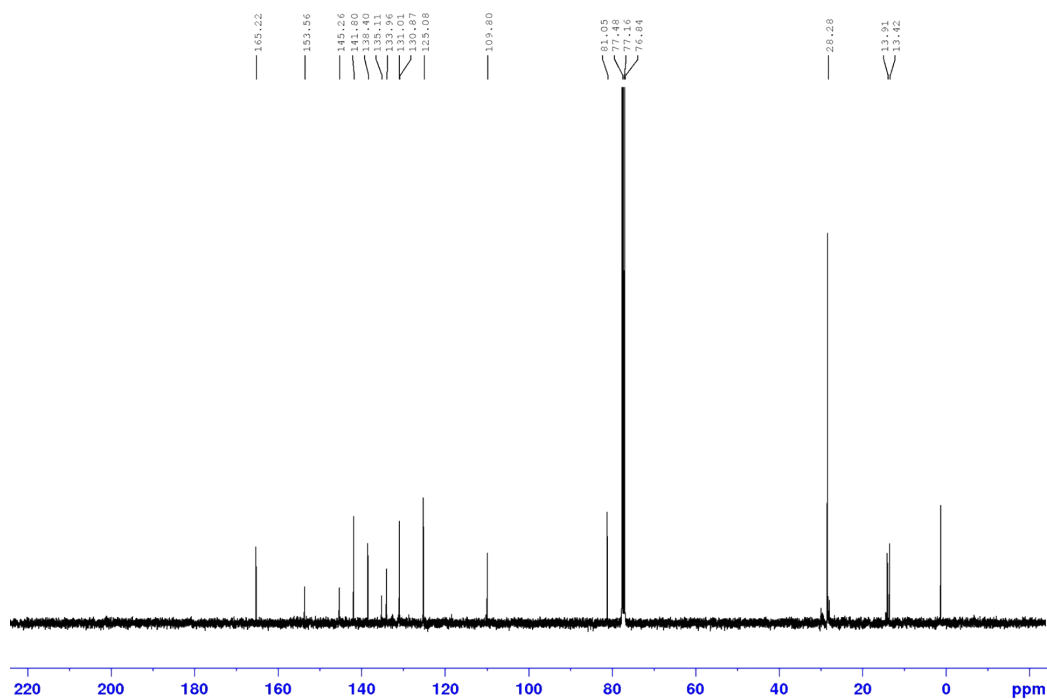

## HRMS of 3aa

### Elemental Composition Report

Page 1

#### Single Mass Analysis

Tolerance = 5.0 PPM / DBE: min = -1.5, max = 50.0

Element prediction: Off

Number of isotope peaks used for i-FIT = 3

Monoisotopic Mass, Even Electron Ions

46 formula(e) evaluated with 1 results within limits (up to 3 closest results for each mass)

Elements Used:

C: 0-25 H: 0-200 N: 0-2 O: 0-6 S: 0-1

MA-168 s2

QMI DIVISION, CSIR-IIIM JAMMU  
Xevo G2-XS QTOF YFC2015

01-Feb-2022  
12:12:49  
1: TOF MS ES+  
2.68e+006

010222\_06 8 (0.172) Cm (8)

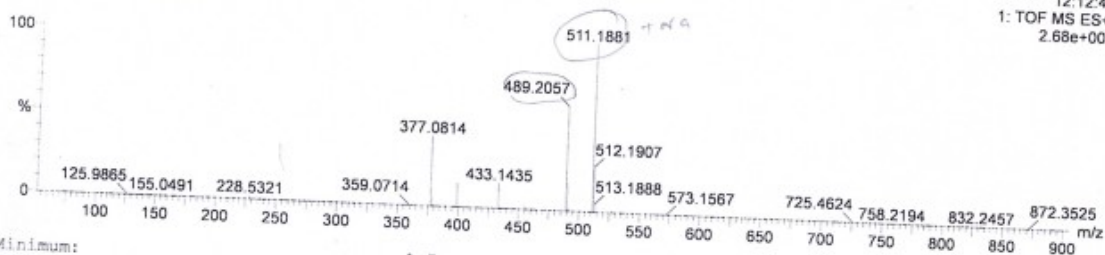

Minimum:  
Maximum:

2.0 5.0 -1.5  
50.0

| Mass     | Calc. Mass | mDa  | PPM  | DBE  | i-FIT | Norm | Conf(%) | Formula         |
|----------|------------|------|------|------|-------|------|---------|-----------------|
| 489.2057 | 489.2059   | -0.2 | -0.4 | 10.5 | 32.7  | n/a  | n/a     | C25 H33 N2 O6 S |

## <sup>1</sup>H-NMR (400 MHz, CDCl<sub>3</sub>) of 4a

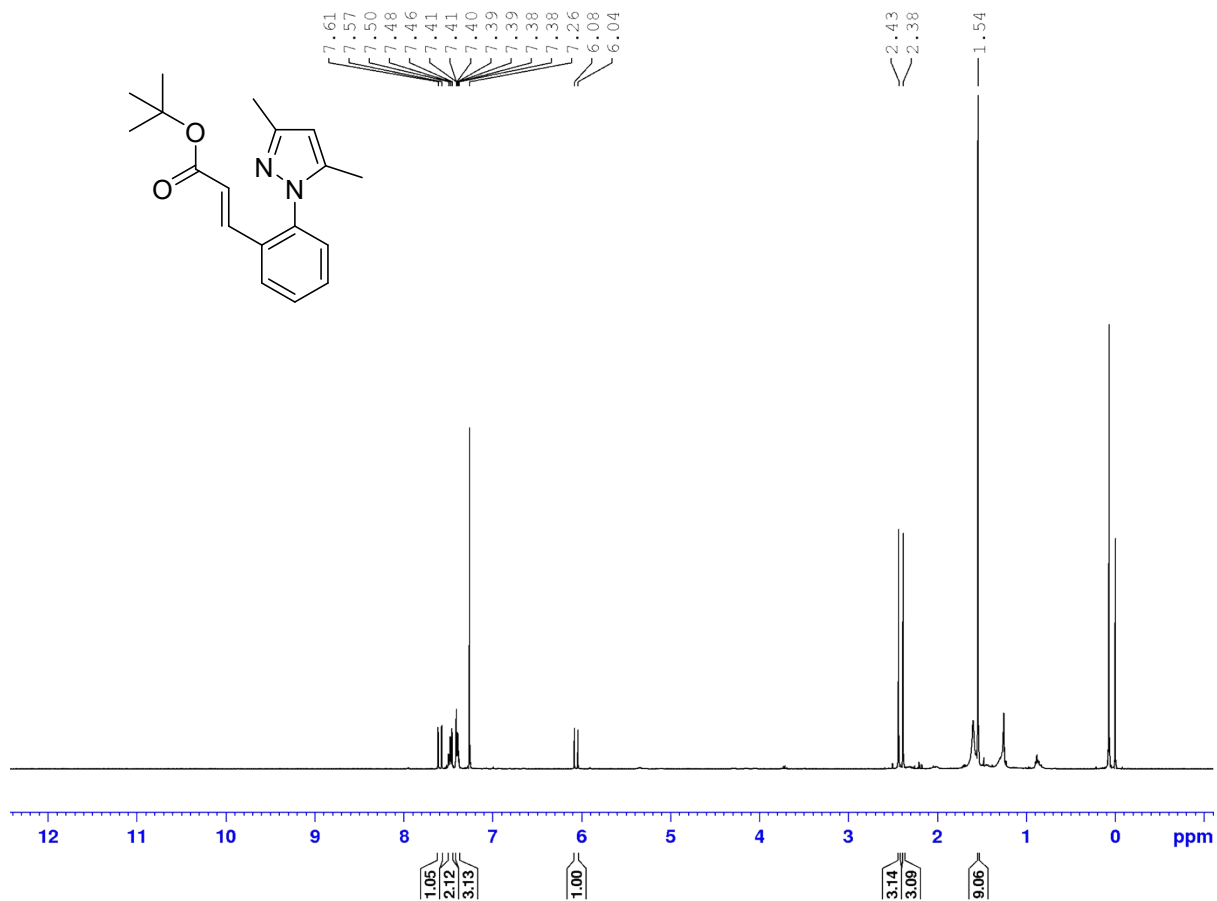

$^{13}\text{C}\{^1\text{H}\}$ -NMR (101 MHz,  $\text{CDCl}_3$ ) of 4a

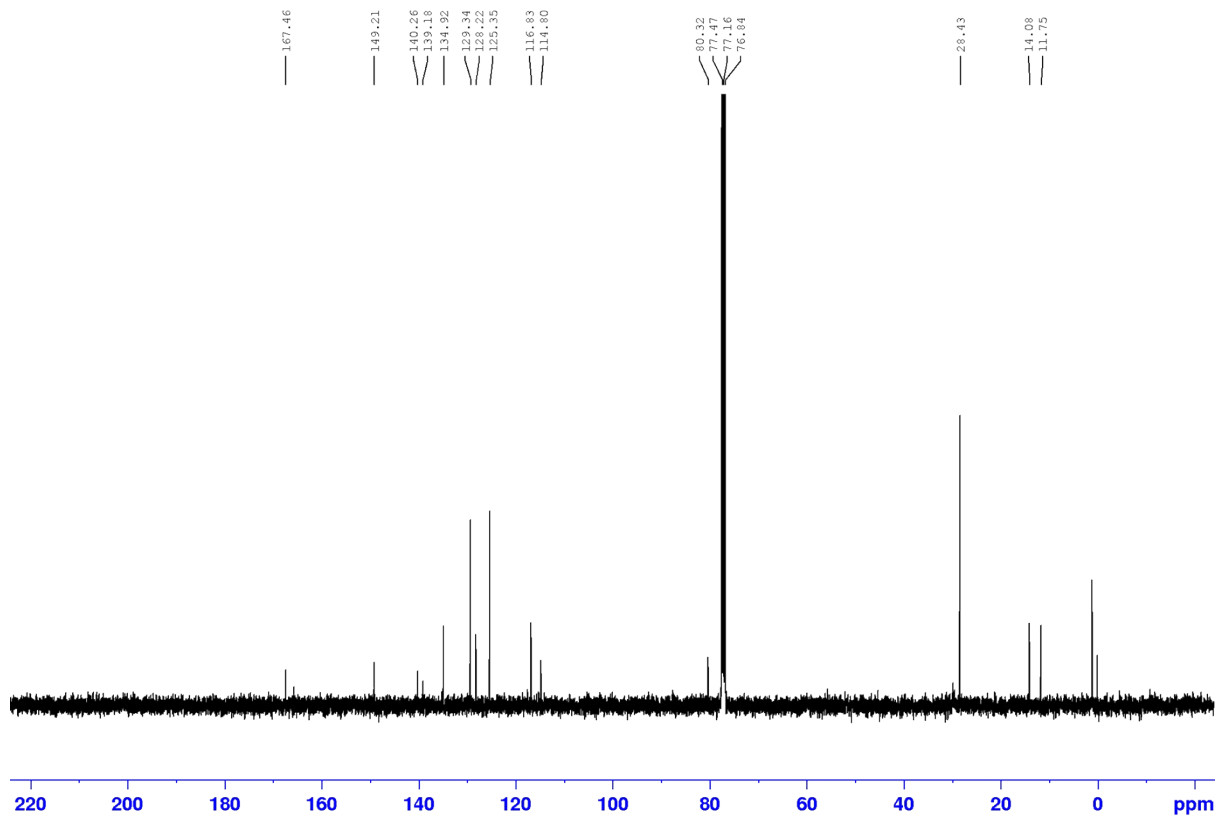

HRMS of 4a

Elemental Composition Report

Single Mass Analysis

Tolerance = 50.0 PPM / DBE: min = -1.5, max = 50.0  
 Element prediction: Off  
 Number of isotope peaks used for i-FIT = 3

Monoisotopic Mass, Even Electron Ions  
 10 formula(e) evaluated with 1 results within limits (up to 3 closest results for each mass)

Elements Used:  
 C: 0-18 H: 0-100 N: 0-2 O: 0-2  
 MA-PYZ

QMI DIVISION, CSIR-IIIM JAMMU  
 Xevo G2-XS QTOF YFC2015

22-Feb-2023  
 11:19:38  
 1: TOF MS ES+  
 1.13e+007

220240 8 (0.172)

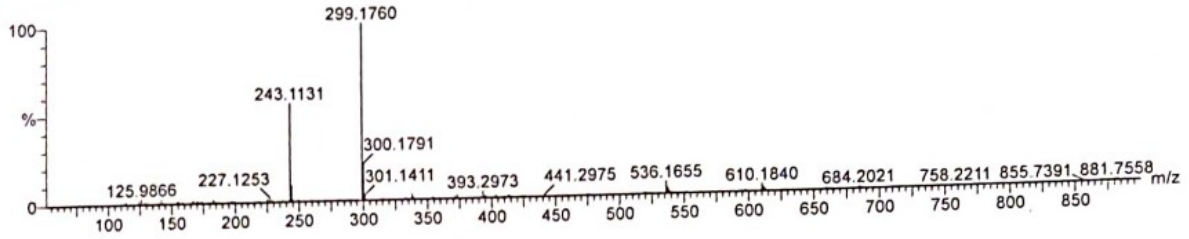

Minimum: -1.5  
 Maximum: 2.0 50.0 50.0

| Mass     | Calc. Mass | mDa | PPM | DBE | i-FIT  | Norm | Conf (%) | Formula       |
|----------|------------|-----|-----|-----|--------|------|----------|---------------|
| 299.1760 | 299.1760   | 0.0 | 0.0 | 8.5 | 1219.8 | n/a  | n/a      | C18 H23 N2 O2 |

<sup>1</sup>H-NMR (400 MHz, CDCl<sub>3</sub>) of 4b

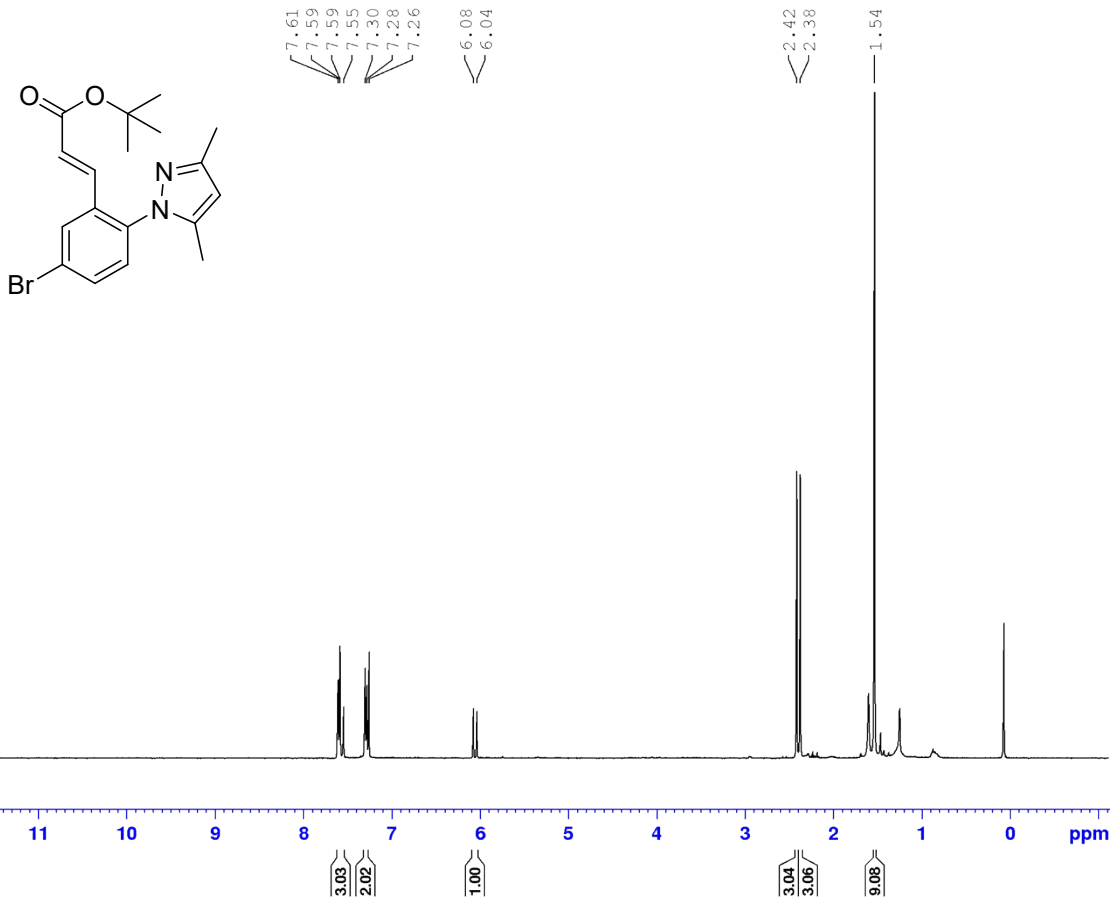

<sup>13</sup>C{<sup>1</sup>H}-NMR (101 MHz, CDCl<sub>3</sub>) of 4b

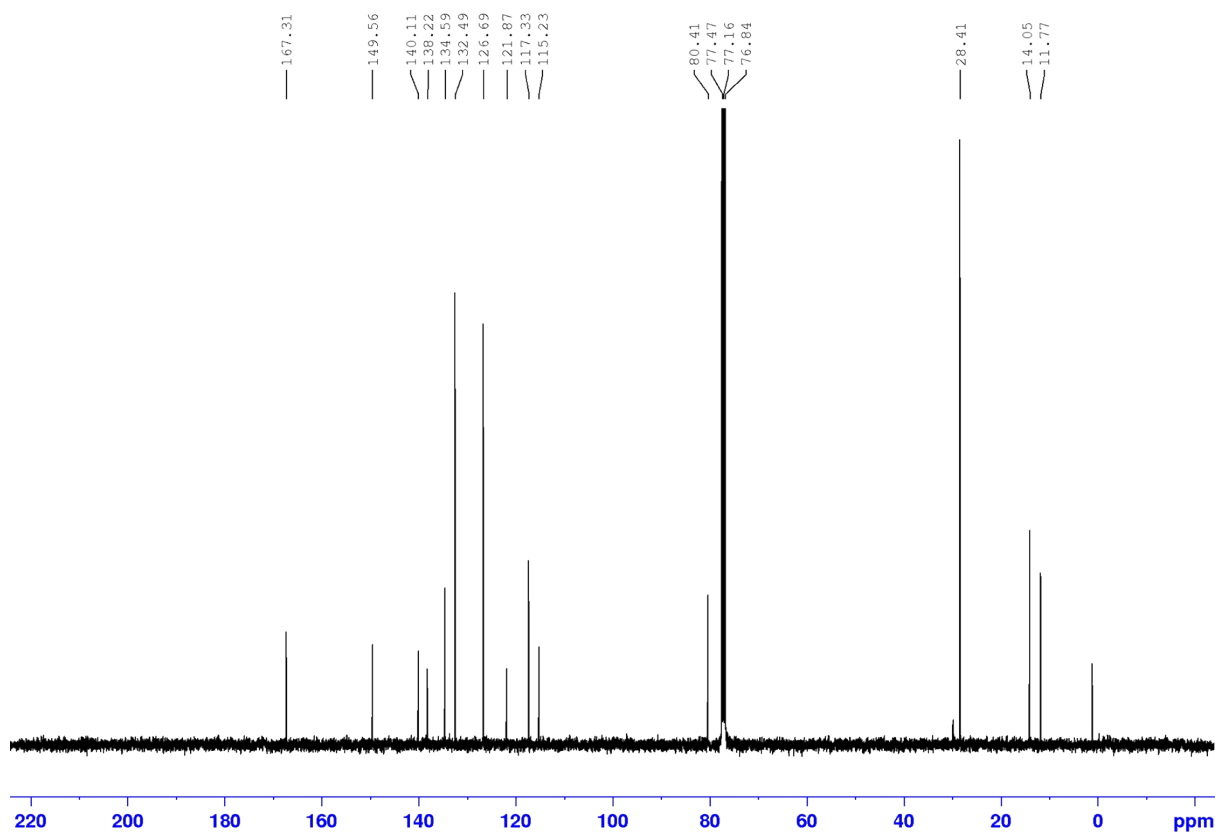

### HRMS of 4b

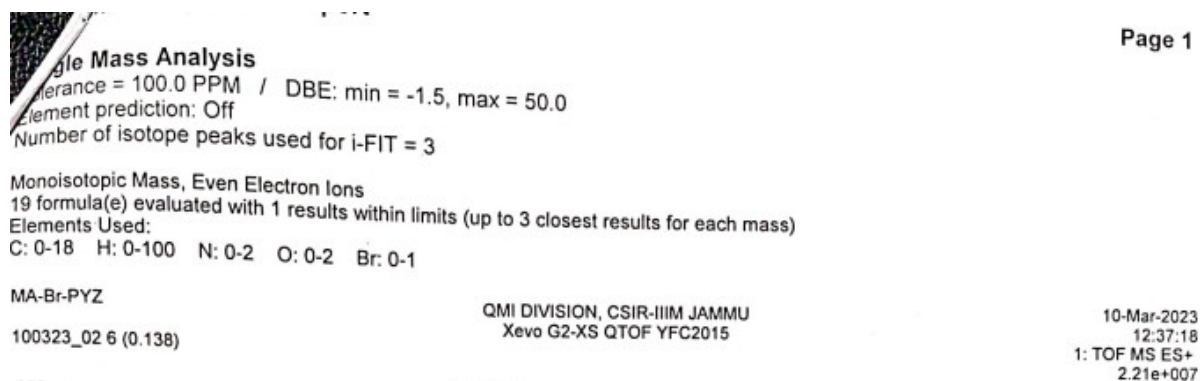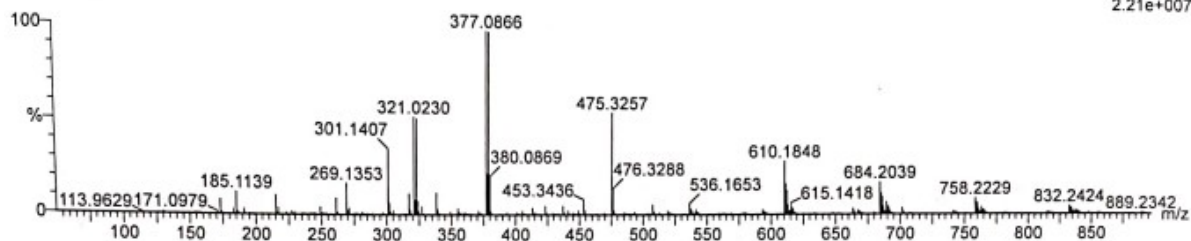

Minimum: -1.5  
 Maximum: 2.0 100.0 50.0

| Mass     | Calc. Mass | mDa | PPM | DBE | i-FIT | Norm | Conf (%) | Formula          |
|----------|------------|-----|-----|-----|-------|------|----------|------------------|
| 377.0866 | 377.0865   | 0.1 | 0.3 | 8.5 | 989.7 | n/a  | n/a      | C18 H22 N2 O2 Br |

### <sup>1</sup>H-NMR (400 MHz, CDCl<sub>3</sub>) of 4c

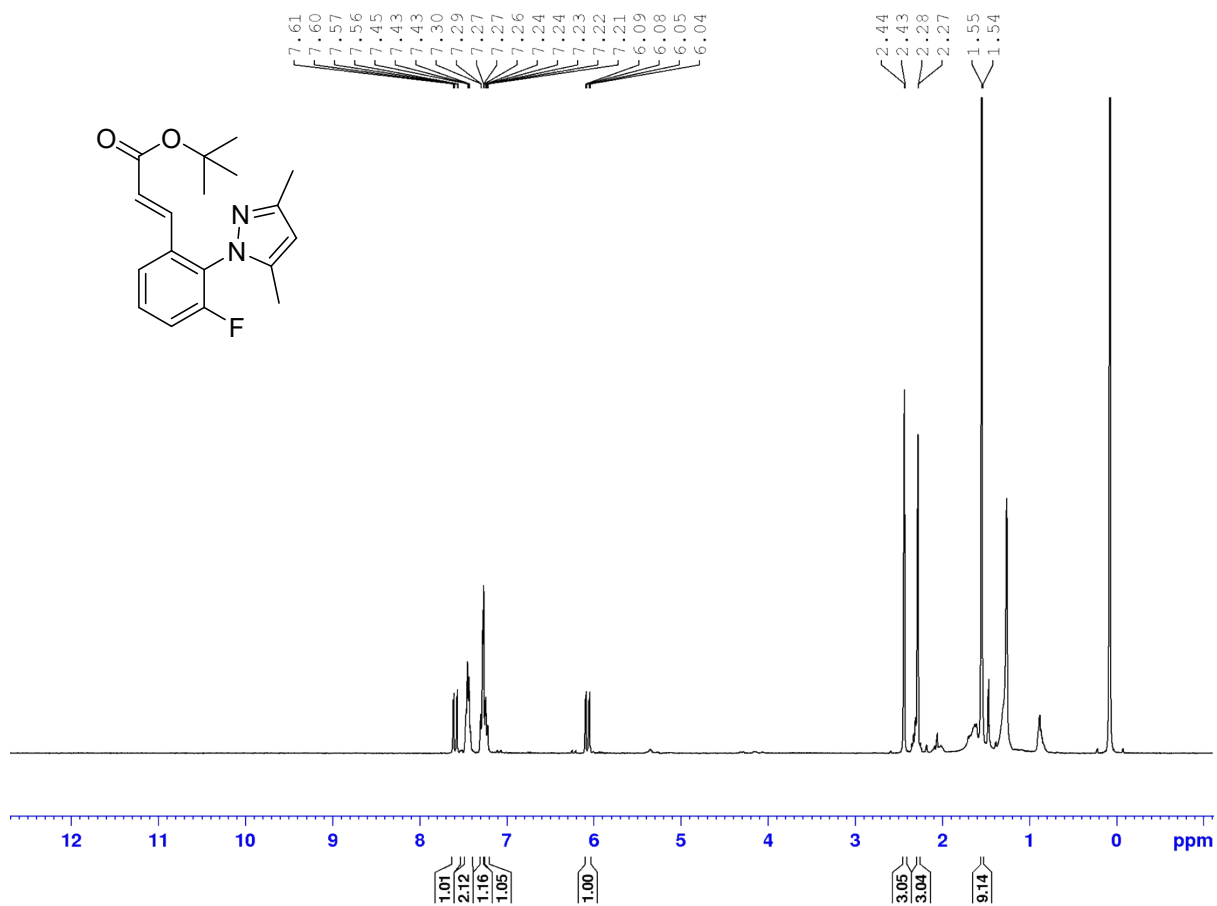

$^{13}\text{C}\{^1\text{H}\}$ -NMR (101 MHz,  $\text{CDCl}_3$ ) of 4c

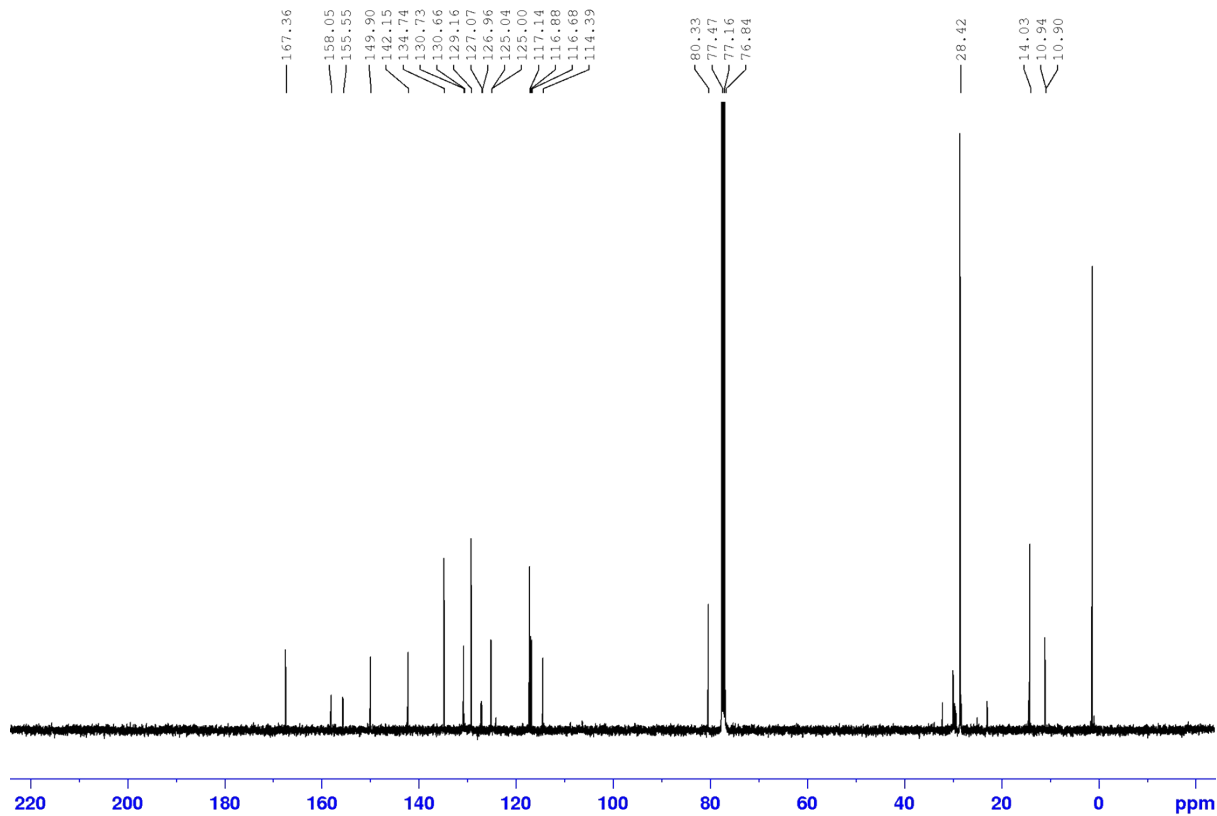

# <sup>19</sup>F-NMR (377 MHz, CDCl<sub>3</sub>) of 4c

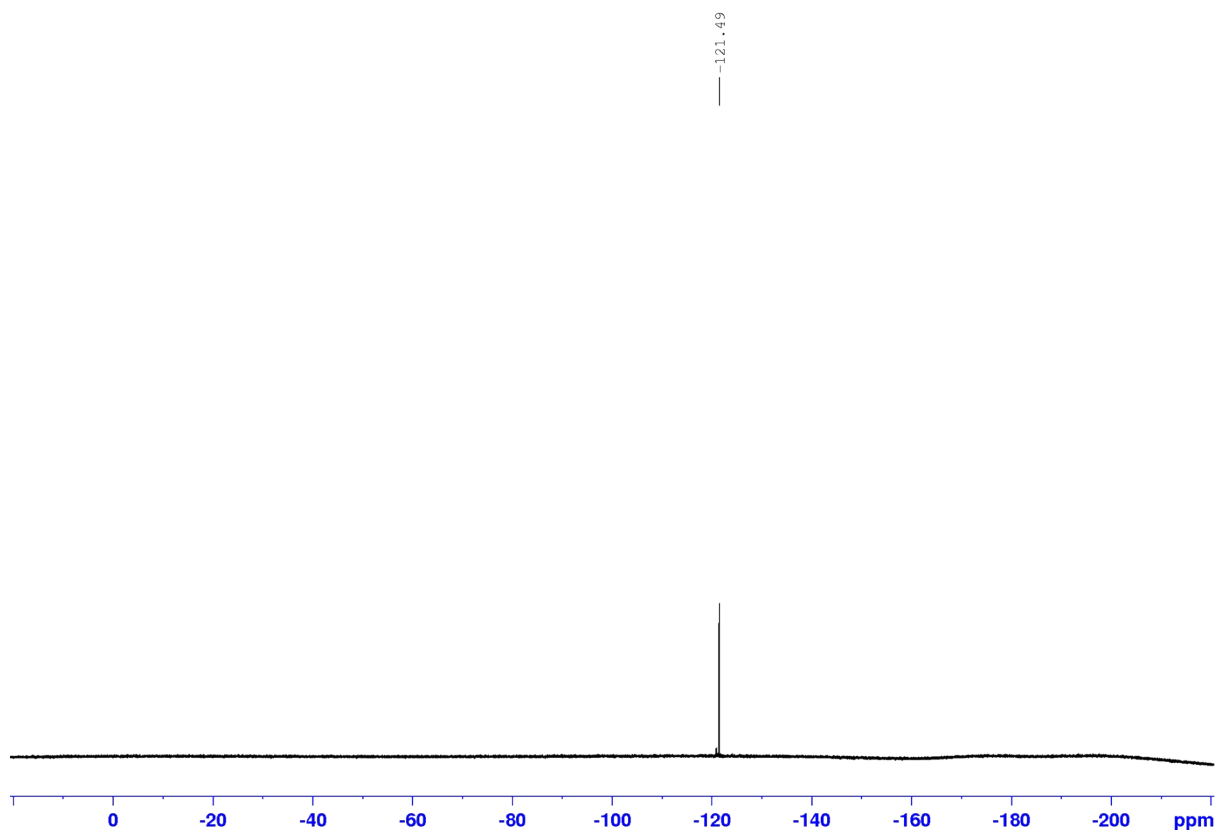

## HRMS of 4c

### Elemental Composition Report

Page 1

#### Single Mass Analysis

Tolerance = 100.0 PPM / DBE: min = -1.5, max = 50.0  
Element prediction: Off  
Number of isotope peaks used for i-FIT = 3

#### Monoisotopic Mass, Even Electron Ions

19 formula(e) evaluated with 1 results within limits (up to 3 closest results for each mass)

Elements Used:

C: 0-18 H: 0-100 N: 0-2 O: 0-2 F: 0-1

MA-2F-PYZ

QMI DIVISION, CSIR-IIIM JAMMU  
Xevo G2-XS QTOF YFC2015

10-Mar-2023  
12:33:46  
1: TOF MS ES+  
2.77e+007

100323\_03 8 (0.172)

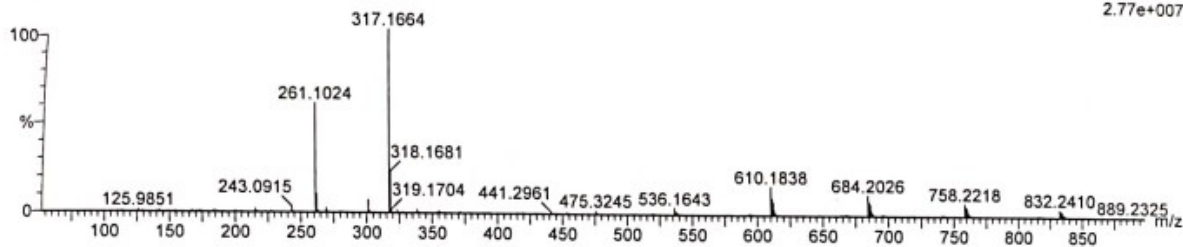

Minimum: -1.5  
Maximum: 2.0 100.0 50.0

| Mass     | Calc. Mass | mDa  | PPM  | DBE | i-FIT  | Norm | Conf (%) | Formula         |
|----------|------------|------|------|-----|--------|------|----------|-----------------|
| 317.1664 | 317.1665   | -0.1 | -0.3 | 8.5 | 1188.3 | n/a  | n/a      | C18 H22 N2 O2 F |

## <sup>1</sup>H-NMR (400 MHz, DMSO-d<sub>6</sub>) of 5a

7.68  
7.68  
7.67  
7.66  
7.60  
7.56  
7.42  
7.41  
7.40  
6.54  
6.50

— 3.47

2.50  
2.50  
2.50

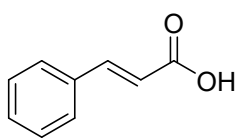

**$^{13}\text{C}\{^1\text{H}\}$ -NMR (101 MHz, DMSO- $d_6$ ) of 5a**

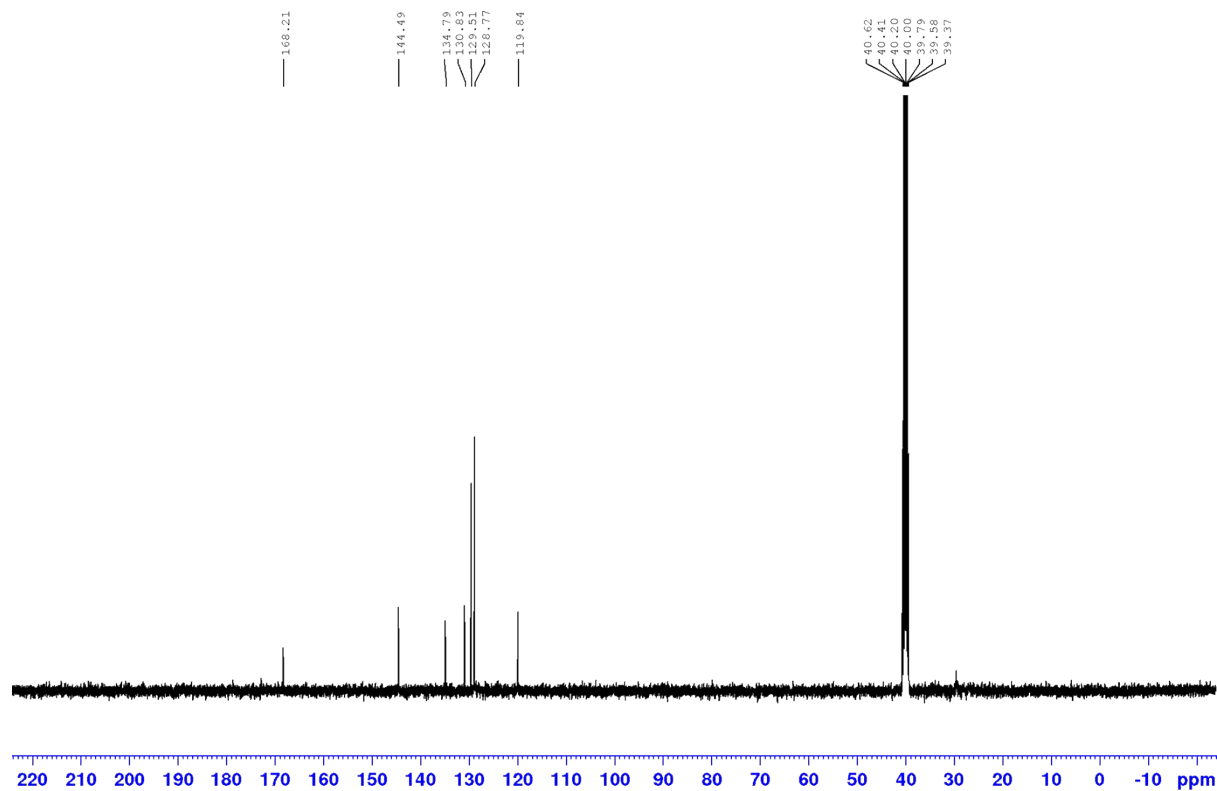

**$^1\text{H}$ -NMR (400 MHz, DMSO- $d_6$ ) of 5b**



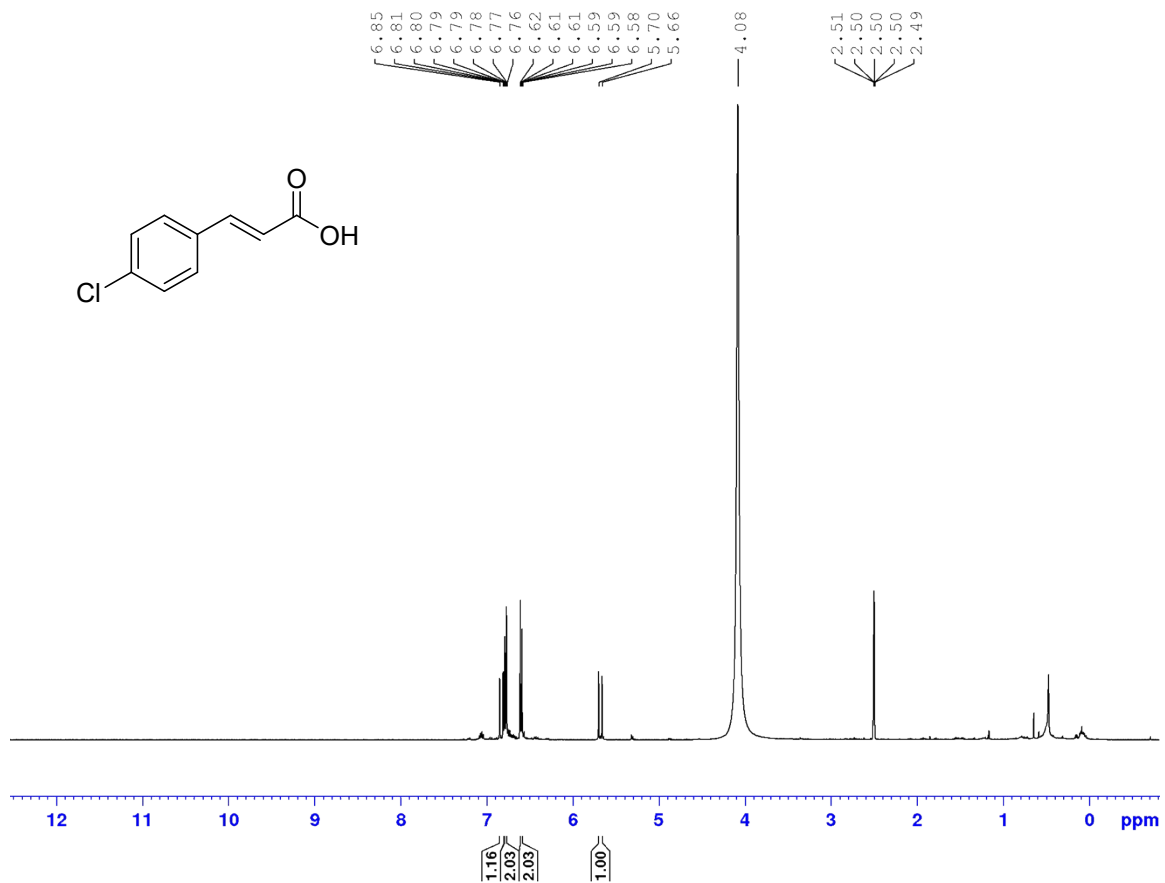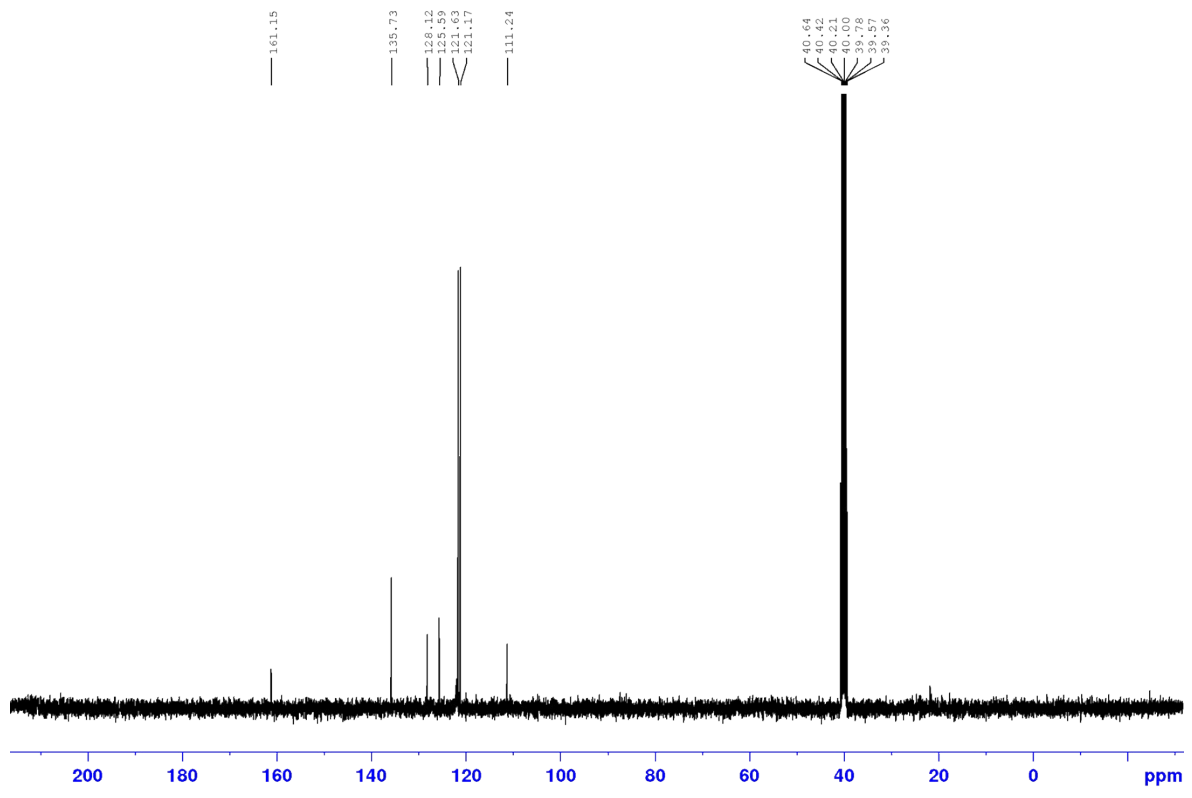

$^1\text{H}$ -NMR (400 MHz, DMSO- $d_6$ ) of 5c

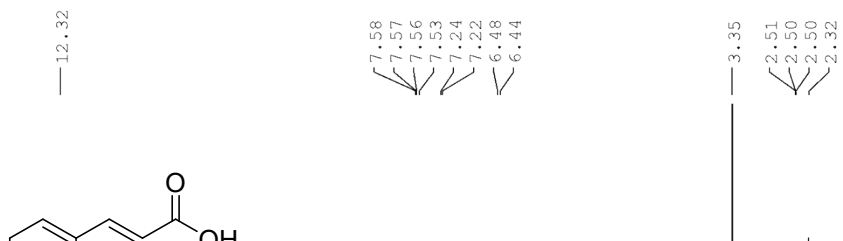

**$^{13}\text{C}\{^1\text{H}\}$ -NMR (101 MHz, DMSO- $d_6$ ) of 5c**

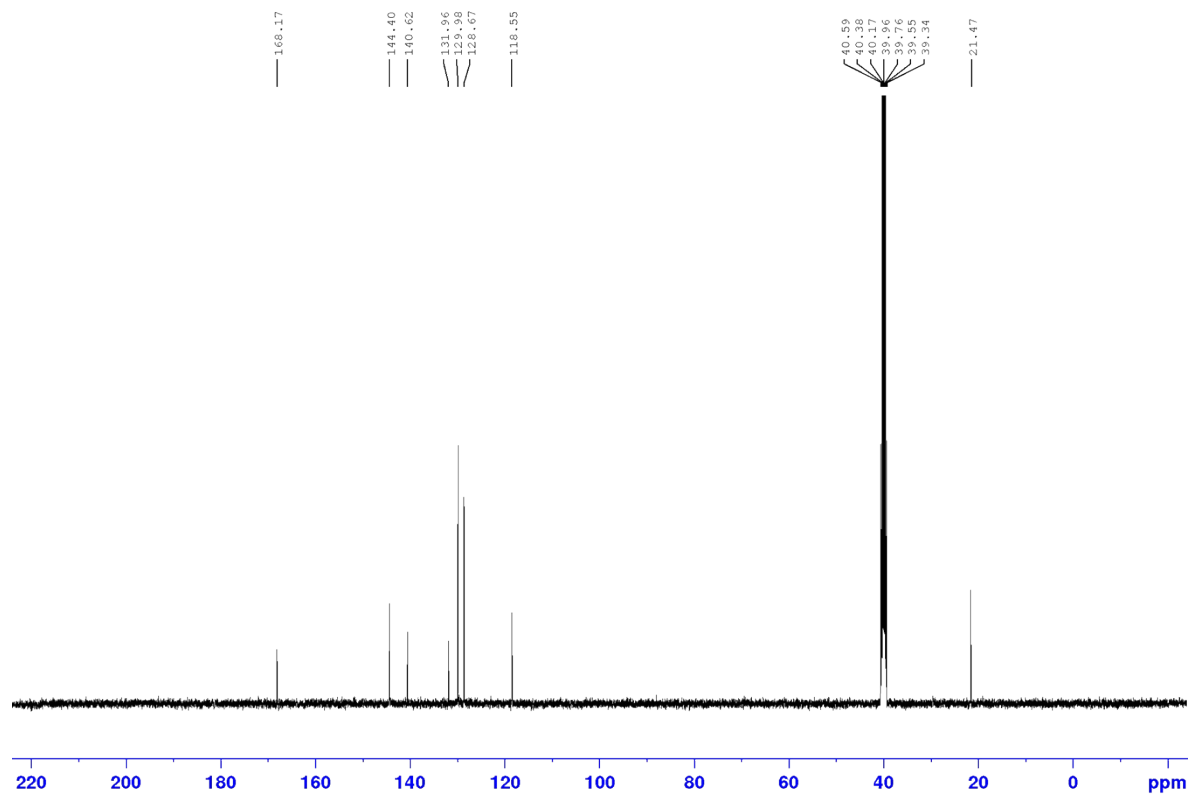

**$^1\text{H}$ -NMR (400 MHz, DMSO- $d_6$ ) of 5d**

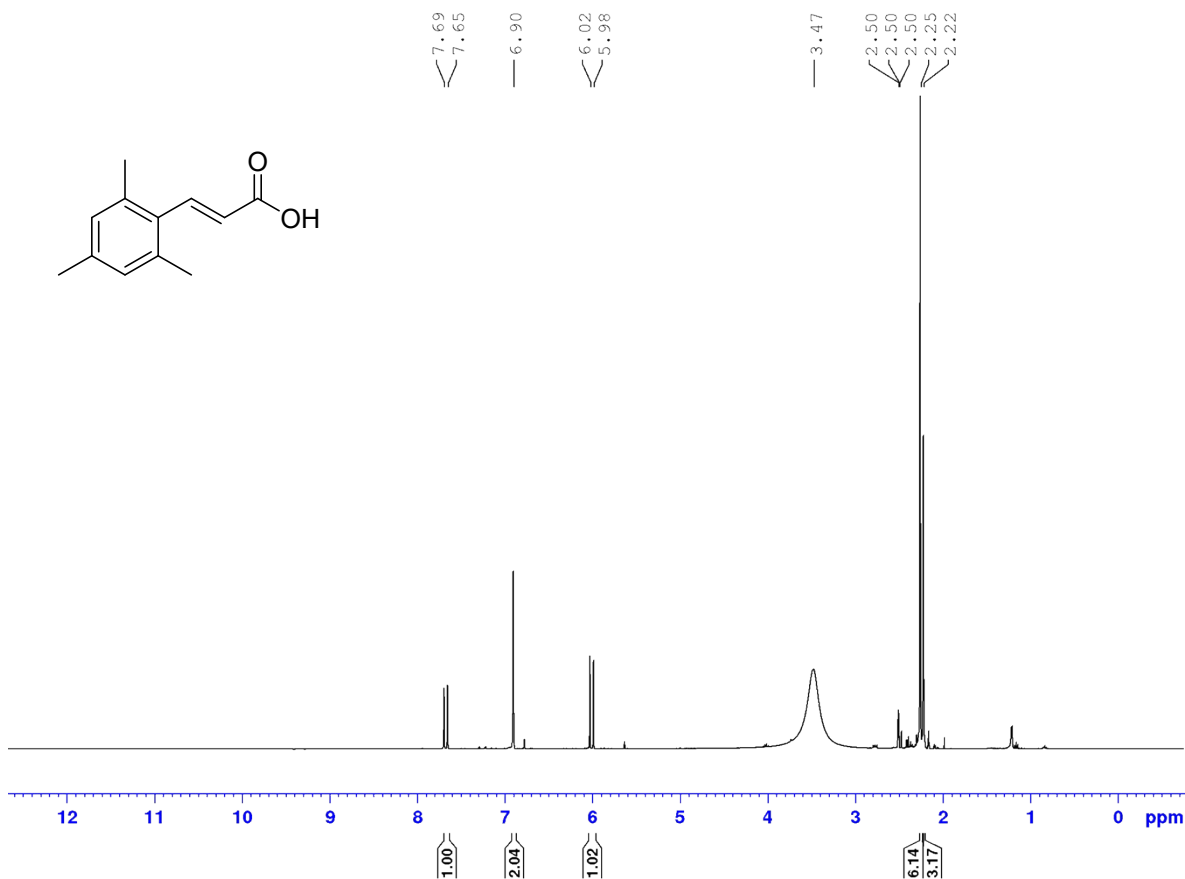

**<sup>13</sup>C{<sup>1</sup>H}-NMR (101 MHz, DMSO-d<sub>6</sub>) of 5d**

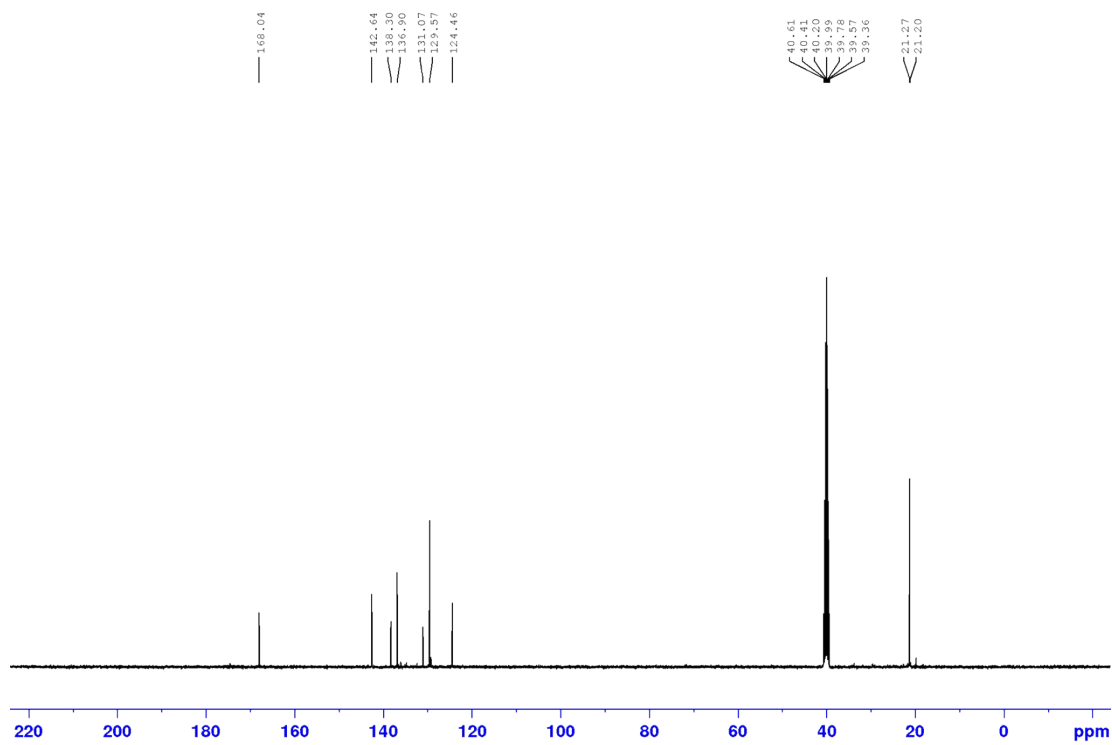

**<sup>1</sup>H-NMR (400 MHz, DMSO-d<sub>6</sub>) of 5e**

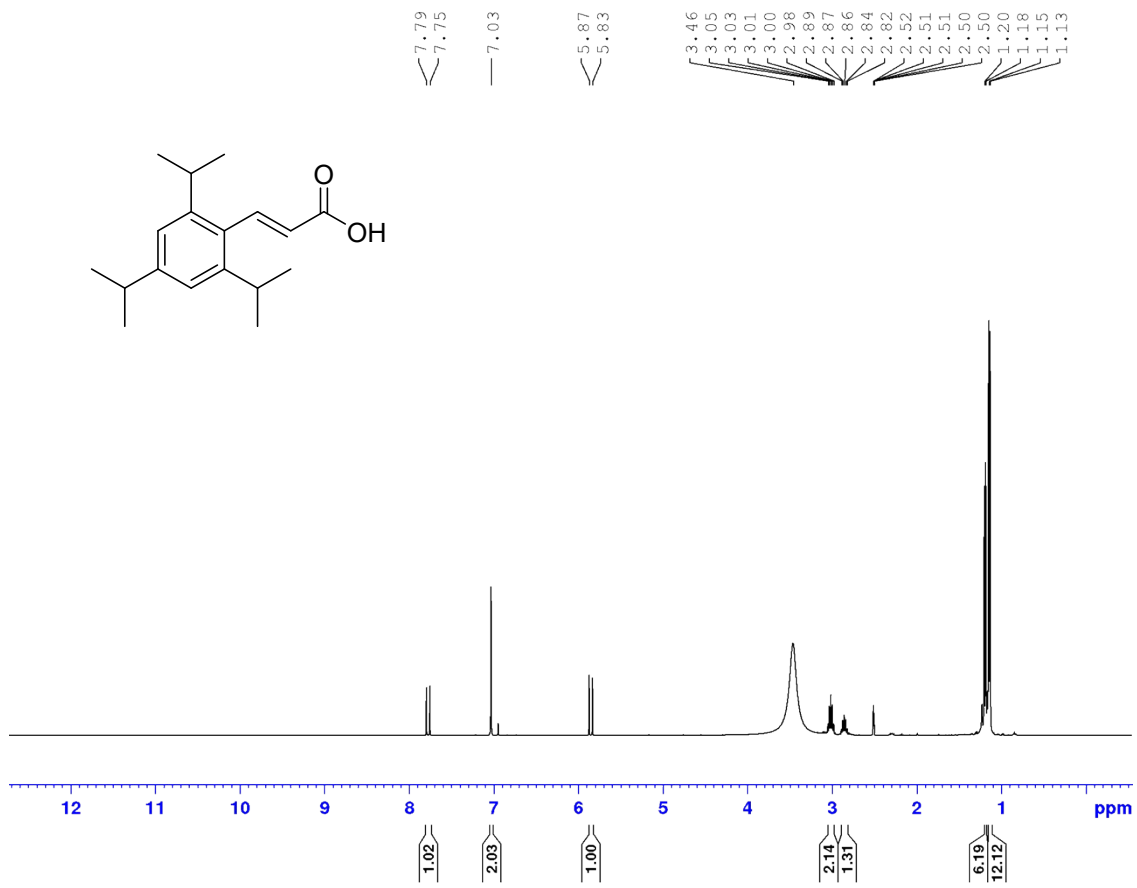

$^{13}\text{C}\{^1\text{H}\}$ -NMR (101 MHz, DMSO- $d_6$ ) of 5e

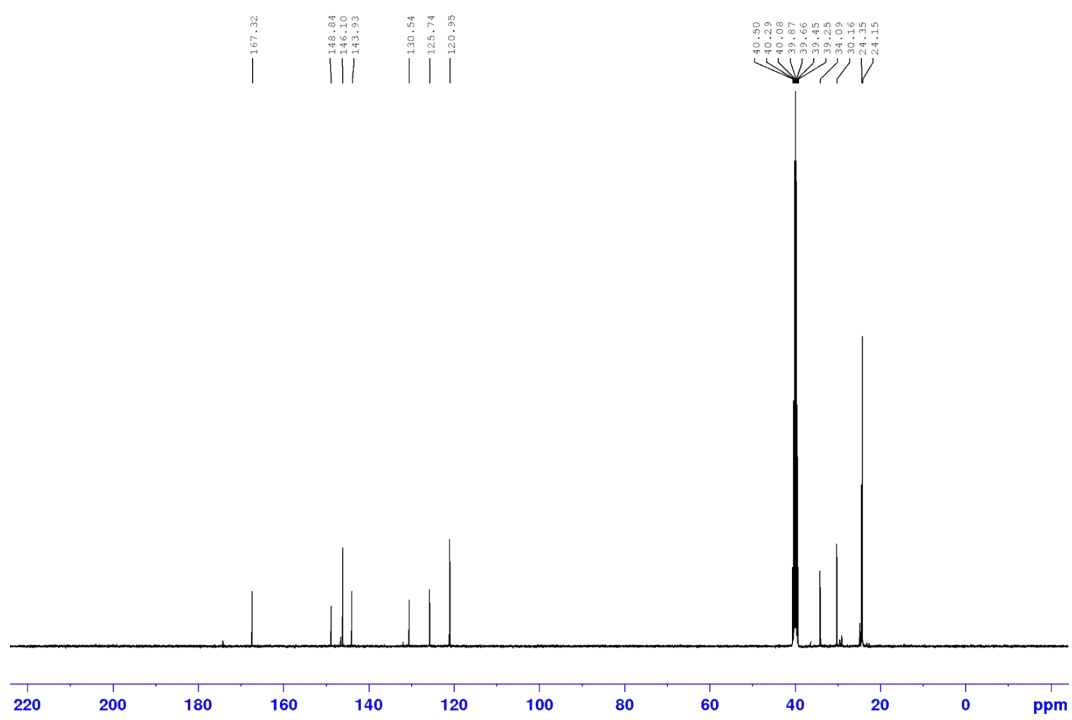

## References :

1. R. F. Pellon, T. Mamposo, E. Gonzalez and O. Calderon, *Synth. Commun.*, 2000, **30**, 3769-3774.
